# Supplementary material for: Development and Implementation of a scalable and versatile test for COVID-19 diagnostics in rural communities
Source: bioRxiv or medRxiv preprint supplement (doi:10.1101/2021.03.01.21252679), 2021-03-08

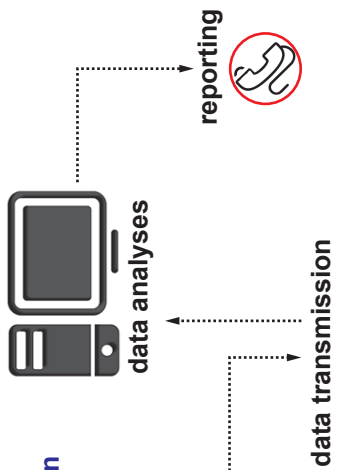

blue station, sample amplification

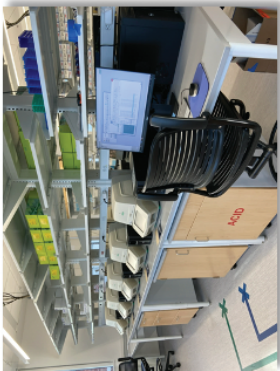

blue station, standard curves

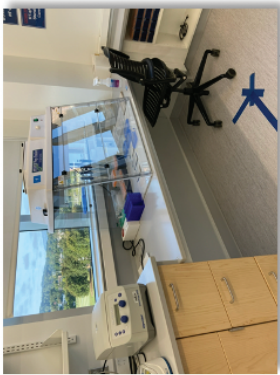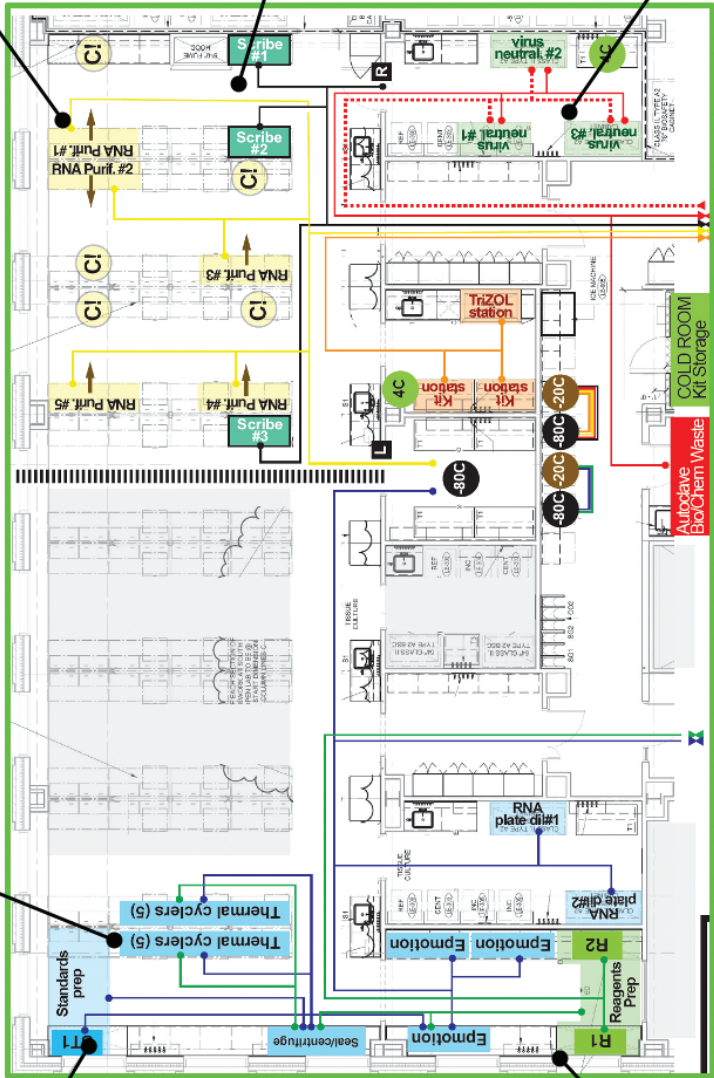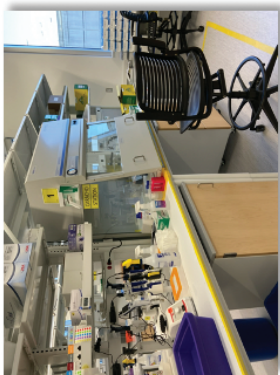

yellow station, RNA extraction

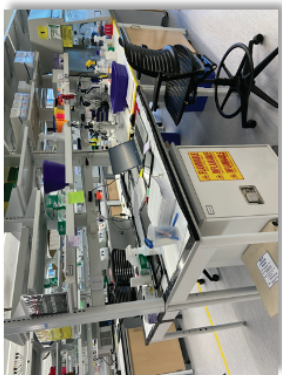

black station, scribe

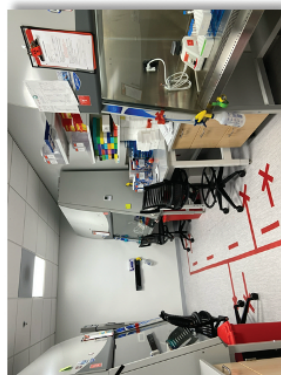

red station, neutralization

green station, PCR setup

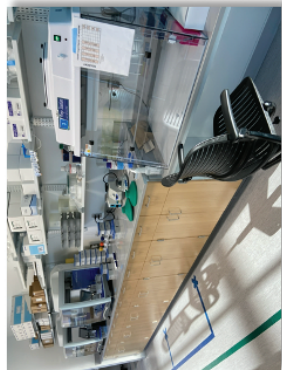

Supplement: Supplementary file [file media-1.pdf]
