# Supplementary material for: Development and Implementation of a scalable and versatile test for COVID-19 diagnostics in rural communities
Source: bioRxiv or medRxiv preprint supplement (doi:10.1101/2021.03.01.21252679), 2021-03-08

| Copy # (10 <sup>x</sup> ) | N        | E        | S        |
|---------------------------|----------|----------|----------|
| 0                         | 37.93333 | 36.56667 | -        |
| 1                         | 34.34667 | 34.04000 | 33.48333 |
| 2                         | 30.56667 | 30.44667 | 29.99667 |
| 3                         | 27.08333 | 26.83667 | 26.59000 |
| 4                         | 23.63667 | 23.26667 | 23.16000 |

|            |          |          |          |
|------------|----------|----------|----------|
| slope      | -3.58570 | -3.38030 | -3.43770 |
| efficiency | 1.90058  | 1.97620  | 1.95385  |
| percentage | 90.05775 | 97.62038 | 95.3854  |

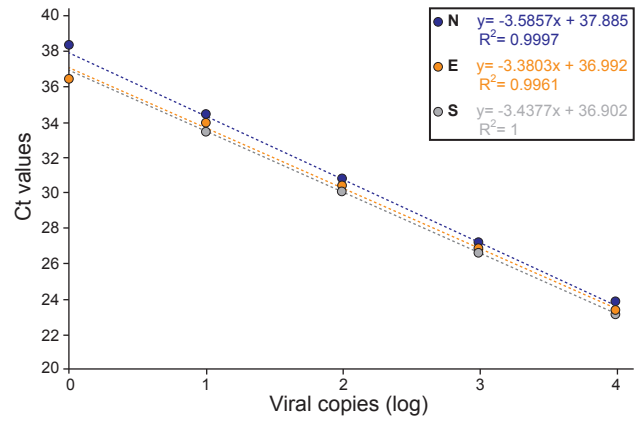

Supplement: Supplementary file [file media-2.pdf]
