# Supplementary material for: Development and Implementation of a scalable and versatile test for COVID-19 diagnostics in rural communities
Source: bioRxiv or medRxiv preprint supplement (doi:10.1101/2021.03.01.21252679), 2021-03-08
Supplement: Supplementary file [file media-3.pdf]

**Supplementary Table I**

**A.**

PCR Master Mix:

| Master mix components    | Volume per reaction (μl)/well |
|--------------------------|-------------------------------|
| RT-PCR enzyme mix (125x) | 0.08                          |
| SYBR™ master mix (2x)    | 5                             |
| 4μM Forward Primer       | 0.5                           |
| 4μM Reverse Primer       | 0.5                           |
| DNase/RNase free water   | 1.92                          |
| Total                    | 8                             |

+ 2 μl (1:20 dilution) of RNA template, positive control plasmid, non-template control water.

Cyclin parameters:

| Cycling Stage                  | Step | Temperature                 | Time  |
|--------------------------------|------|-----------------------------|-------|
| Holding                        | 1    | 48°C                        | 30:00 |
|                                | 2    | 95°C                        | 10:00 |
| Cycling                        | 3    | 95°C                        | 00:15 |
|                                | 4    | 60°C                        | 01:00 |
|                                | 5    | Go to Step 3, 44 more times |       |
| Melt Curve,<br>increment 0.5°C | 6    | 95°C                        | 00:15 |
|                                |      | 65°C                        | 00:15 |

**B.**

| Primer name           | Forward sequence (5' to 3') | Reverse sequence (5' to 3') | Target gene       | Gene product                           |
|-----------------------|-----------------------------|-----------------------------|-------------------|----------------------------------------|
| N*                    | GCTGCAATCGTGCTACAAC         | TGAACTGTTGCGACTACGTG        | <i>N</i> gene     | SARS-CoV-2 nucleocapsid protein        |
| E*                    | TTCGGAAGAGACAGGTACGTT       | CACACAATCGATGCGCAGTA        | <i>E</i> gene     | SARS-CoV-2 Small envelope protein      |
| S                     | GCTGGTGCTGCAGCTTATTA        | AGGGTCAAGTGCACAGTCTA        | <i>S</i> gene     | SARS-CoV-2 Spike surface glycoprotein  |
| CDC_RNAseP (from CDC) | AGATTTGGACCTGCGAGCG         | GAGCGGCTGTCTCCACAAGT        | <i>RPP30</i> gene | Human Ribonuclease P (RNase P) protein |
