# Supplementary material for: Development and Implementation of a scalable and versatile test for COVID-19 diagnostics in rural communities
Source: bioRxiv or medRxiv preprint supplement (doi:10.1101/2021.03.01.21252679), 2021-03-08
Supplement: Supplementary file [file media-4.pdf]

**Supplementary Table II**

| <b><i>N</i> gene</b>                       | <b><i>S</i> gene</b> | <b><i>E</i> gene</b> | <b><i>RPP30</i> gene</b> | <b>Status</b> | <b>Result</b>           | <b>Action</b>                                                                                                                        |
|--------------------------------------------|----------------------|----------------------|--------------------------|---------------|-------------------------|--------------------------------------------------------------------------------------------------------------------------------------|
| NEG                                        | NEG                  | NEG                  | NEG                      | Invalid       | N/A                     | Repeat test. If the repeat results remain invalid, a new sample would need to be collected.                                          |
| NEG                                        | NEG                  | NEG                  | POS                      | Valid         | SARS-CoV-2 no detected  | Report results.                                                                                                                      |
| Only one SARS-CoV-2 target gene is POS     |                      |                      | POS                      | Valid         | SARS-CoV-2 inconclusive | Repeat test. If the repeat result remains inconclusive, additional confirmation testing should be conducted if clinically indicated. |
| Two or more SARS-CoV-2 target gene are POS |                      |                      | POS                      | Valid         | SARS-CoV-2 positive     | Report results.                                                                                                                      |
