# Supplementary material for: Development and Implementation of a scalable and versatile test for COVID-19 diagnostics in rural communities
Source: bioRxiv or medRxiv preprint supplement (doi:10.1101/2021.03.01.21252679), 2021-03-08
Supplement: Supplementary file [file media-5.pdf]

Supplementary Table III

| cut-off value for N: 37.29, 95% CI: [36.91, 37.67] |                   |                   |              |                   |              |                   |              |
|----------------------------------------------------|-------------------|-------------------|--------------|-------------------|--------------|-------------------|--------------|
| Viral RNA copies/reaction                          | Replicate         | C <sub>T</sub> _N | N Conclusion | C <sub>T</sub> _E | E Conclusion | C <sub>T</sub> _S | S Conclusion |
| 300 copies                                         | 1                 | 31.36             | Positive     | 31.45             | Positive     | 31.39             | Positive     |
| 300 copies                                         | 2                 | 31.25             | Positive     | 31.15             | Positive     | 31.79             | Positive     |
| 300 copies                                         | 3                 | 31.02             | Positive     | 31.23             | Positive     | 31.59             | Positive     |
| 300 copies                                         | 4                 | 31.32             | Positive     | 31.55             | Positive     | 31.55             | Positive     |
| 300 copies                                         | 5                 | 31.53             | Positive     | 31.25             | Positive     | 31.41             | Positive     |
| 300 copies                                         | 6                 | 31.28             | Positive     | 30.74             | Positive     | 31.34             | Positive     |
| 300 copies                                         | 7                 | 31.13             | Positive     | 30.97             | Positive     | 31.35             | Positive     |
| 300 copies                                         | 8                 | 31.04             | Positive     | 31.03             | Positive     | 31.31             | Positive     |
| 300 copies                                         | 9                 | 31.19             | Positive     | 31.31             | Positive     | 31.43             | Positive     |
| 300 copies                                         | 10                | 31.31             | Positive     | 31.45             | Positive     | 31.63             | Positive     |
| 300 copies                                         | 11                | 31.44             | Positive     | 31.09             | Positive     | 30.98             | Positive     |
| 300 copies                                         | 12                | 31                | Positive     | 30.73             | Positive     | 30.46             | Positive     |
| 300 copies                                         | 13                | 30.92             | Positive     | 30.75             | Positive     | 31.1              | Positive     |
| 300 copies                                         | 14                | 31.09             | Positive     | 31.04             | Positive     | 30.74             | Positive     |
| 300 copies                                         | 15                | 31.38             | Positive     | 30.94             | Positive     | 31.09             | Positive     |
| 300 copies                                         | 16                | 31.2              | Positive     | 30.57             | Positive     | 30.53             | Positive     |
| 300 copies                                         | 17                | 31.15             | Positive     | 30.94             | Positive     | 31.03             | Positive     |
| 300 copies                                         | 18                | 31.1              | Positive     | 30.79             | Positive     | 30.97             | Positive     |
| 300 copies                                         | 19                | 31.47             | Positive     | 31.04             | Positive     | 31.06             | Positive     |
| 300 copies                                         | 20                | 31.36             | Positive     | 31.26             | Positive     | 30.97             | Positive     |
|                                                    | <b>SD</b>         | <b>0.17</b>       |              | <b>0.27</b>       |              | <b>0.36</b>       |              |
|                                                    | <b>% Positive</b> |                   | <b>20/20</b> |                   | <b>20/20</b> |                   | <b>20/20</b> |
