# Supplementary material for: Development and Implementation of a scalable and versatile test for COVID-19 diagnostics in rural communities
Source: bioRxiv or medRxiv preprint supplement (doi:10.1101/2021.03.01.21252679), 2021-03-08
Supplement: Supplementary file [file media-6.pdf]

Supplementary Table IV

| cut-off value for N: 37.7747, 95% CI: [37.04, 38.51] |                   |                   |              |                   |              |                   |              |
|------------------------------------------------------|-------------------|-------------------|--------------|-------------------|--------------|-------------------|--------------|
| Viral RNA copies/reaction                            | Replicate         | C <sub>T</sub> _N | N Conclusion | C <sub>T</sub> _E | E Conclusion | C <sub>T</sub> _S | S Conclusion |
| 20 copies                                            | 1                 | 35                | Positive     | 33.6              | Positive     | 33.11             | Positive     |
| 20 copies                                            | 2                 | 33.39             | Positive     | 33.72             | Positive     | 33.42             | Positive     |
| 20 copies                                            | 3                 | 33.92             | Positive     | 33.4              | Positive     | 33.07             | Positive     |
| 20 copies                                            | 4                 | 33.38             | Positive     | 33.09             | Positive     | 32.59             | Positive     |
| 20 copies                                            | 5                 | 33.87             | Positive     | 33.6              | Positive     | 34.2              | Positive     |
| 20 copies                                            | 6                 | 33.2              | Positive     | 33.18             | Positive     | 33.43             | Positive     |
| 20 copies                                            | 7                 | 33.21             | Positive     | 33.47             | Positive     | 32.95             | Positive     |
| 20 copies                                            | 8                 | 33.81             | Positive     | 33.8              | Positive     | 34.51             | Positive     |
| 20 copies                                            | 9                 | 34.14             | Positive     | 33.69             | Positive     | 33.28             | Positive     |
| 20 copies                                            | 10                | 34.04             | Positive     | 34.41             | Positive     | 33.67             | Positive     |
| 20 copies                                            | 11                | 33.75             | Positive     | 32.96             | Positive     | 33.25             | Positive     |
| 20 copies                                            | 12                | 34.06             | Positive     | 33.83             | Positive     | 33.2              | Positive     |
| 20 copies                                            | 13                | 33.67             | Positive     | 33.63             | Positive     | 33.18             | Positive     |
| 20 copies                                            | 14                | 33.68             | Positive     | 33                | Positive     | 33.27             | Positive     |
| 20 copies                                            | 15                | 34.35             | Positive     | 33.74             | Positive     | 33.69             | Positive     |
| 20 copies                                            | 16                | 33.67             | Positive     | 33.35             | Positive     | 33.32             | Positive     |
| 20 copies                                            | 17                | 33.85             | Positive     | 33.85             | Positive     | 33.02             | Positive     |
| 20 copies                                            | 18                | 33.71             | Positive     | 33.61             | Positive     | 32.5              | Positive     |
| 20 copies                                            | 19                | 35.33             | Positive     | 33.44             | Positive     | 32.94             | Positive     |
| 20 copies                                            | 20                | 33.66             | Positive     | 34.27             | Positive     | 32.82             | Positive     |
|                                                      | <b>SD</b>         | <b>0.5298607</b>  |              | <b>0.3733293</b>  |              | <b>0.4812363</b>  |              |
|                                                      | <b>% Positive</b> |                   | <b>20/20</b> |                   | <b>20/20</b> |                   | <b>20/20</b> |
