# Supplementary material for: Development and Implementation of a scalable and versatile test for COVID-19 diagnostics in rural communities
Source: bioRxiv or medRxiv preprint supplement (doi:10.1101/2021.03.01.21252679), 2021-03-08
Supplement: Supplementary file [file media-7.pdf]

Supplementary Table V

| cut-off value for N: 37.29, 95% CI: [36.91, 37.67] |                   |                   |              |                   |              |                   |              |
|----------------------------------------------------|-------------------|-------------------|--------------|-------------------|--------------|-------------------|--------------|
| Viral RNA copies/reaction                          | Replicate         | C <sub>T</sub> _N | N Conclusion | C <sub>T</sub> _E | E Conclusion | C <sub>T</sub> _S | S Conclusion |
| 1.3 copies                                         | 1                 | 37.17             | Negative     | N/A               | Negative     | N/A               | Negative     |
| 1.3 copies                                         | 2                 | N/A               | Negative     | 37.14             | Negative     | N/A               | Negative     |
| 1.3 copies                                         | 3                 | N/A               | Negative     | N/A               | Negative     | 37.49             | Negative     |
| 1.3 copies                                         | 4                 | N/A               | Negative     | N/A               | Negative     | 40.63             | Negative     |
| 1.3 copies                                         | 5                 | N/A               | Negative     | N/A               | Negative     | N/A               | Negative     |
| 1.3 copies                                         | 6                 | 37.64             | Negative     | 37.14             | Negative     | N/A               | Negative     |
| 1.3 copies                                         | 7                 | N/A               | Negative     | 37.23             | Negative     | N/A               | Negative     |
| 1.3 copies                                         | 8                 | N/A               | Negative     | N/A               | Negative     | N/A               | Negative     |
| 1.3 copies                                         | 9                 | N/A               | Negative     | N/A               | Negative     | 37.5              | Negative     |
| 1.3 copies                                         | 10                | N/A               | Negative     | 37.29             | Negative     | N/A               | Negative     |
| 1.3 copies                                         | 11                | N/A               | Negative     | N/A               | Negative     | N/A               | Negative     |
| 1.3 copies                                         | 12                | 37.07             | Negative     | N/A               | Negative     | N/A               | Negative     |
| 1.3 copies                                         | 13                | N/A               | Negative     | N/A               | Negative     | 36.6              | Negative     |
| 1.3 copies                                         | 14                | N/A               | Negative     | N/A               | Negative     | 38.38             | Negative     |
| 1.3 copies                                         | 15                | N/A               | Negative     | 37.42             | Negative     | N/A               | Negative     |
| 1.3 copies                                         | 16                | N/A               | Negative     | N/A               | Negative     | N/A               | Negative     |
| 1.3 copies                                         | 17                | 37.35             | Negative     | 37.25             | Negative     | 37.55             | Negative     |
| 1.3 copies                                         | 18                | N/A               | Negative     | N/A               | Negative     | N/A               | Negative     |
| 1.3 copies                                         | 19                | N/A               | Negative     | N/A               | Negative     | 44.65             | Negative     |
| 1.3 copies                                         | 20                | N/A               | Negative     | 42.59             | Negative     | N/A               | Negative     |
|                                                    | <b>SD</b>         | 0.25              |              | 2.02              |              | 2.8               |              |
|                                                    | <b>% Positive</b> |                   | <b>0/20</b>  |                   | <b>0/20</b>  |                   | <b>0/20</b>  |
