# Supplementary material for: Development and Implementation of a scalable and versatile test for COVID-19 diagnostics in rural communities
Source: bioRxiv or medRxiv preprint supplement (doi:10.1101/2021.03.01.21252679), 2021-03-08
Supplement: Supplementary file [file media-8.pdf]

## Supplementary Table VIII

The following alignments refer to sequences that have filtered results of  $\geq 80\%$  Identity,  $\geq 80\%$  query coverage, and an E value  $\leq 10$  for the N forward primer; Total of 3 hits.

### Bat coronavirus RaTG13, complete genome

Sequence ID: [MN996532.1](#) Length: 29855 Number of Matches: 1

Range 1: 28702 to 28721 [GenBank](#) [Graphics](#) [▼ Next Match](#) [▲ Previous Match](#)

| Score         | Expect               | Identities  | Gaps     | Strand    |
|---------------|----------------------|-------------|----------|-----------|
| 40.1 bits(20) | 0.47                 | 20/20(100%) | 0/20(0%) | Plus/Plus |
| Query 1       | GCTGCAATCGTGCTACAACT | 20          |          |           |
| Sbjct 28702   | GCTGCAATCGTGCTACAACT |             |          | 28721     |

### Bat SARS-like coronavirus isolate bat-SL-CoVZXC21, complete genome

Sequence ID: [MG772934.1](#) Length: 29732 Number of Matches: 1

Range 1: 28572 to 28591 [GenBank](#) [Graphics](#) [▼ Next Match](#) [▲ Previous Match](#)

| Score         | Expect               | Identities  | Gaps     | Strand    |
|---------------|----------------------|-------------|----------|-----------|
| 40.1 bits(20) | 0.47                 | 20/20(100%) | 0/20(0%) | Plus/Plus |
| Query 1       | GCTGCAATCGTGCTACAACT | 20          |          |           |
| Sbjct 28572   | GCTGCAATCGTGCTACAACT |             |          | 28591     |

### Bat SARS-like coronavirus isolate bat-SL-CoVZC45, complete genome

Sequence ID: [MG772933.1](#) Length: 29802 Number of Matches: 1

Range 1: 28641 to 28660 [GenBank](#) [Graphics](#) [▼ Next Match](#) [▲ Previous Match](#)

| Score         | Expect               | Identities  | Gaps     | Strand    |
|---------------|----------------------|-------------|----------|-----------|
| 40.1 bits(20) | 0.47                 | 20/20(100%) | 0/20(0%) | Plus/Plus |
| Query 1       | GCTGCAATCGTGCTACAACT | 20          |          |           |
| Sbjct 28641   | GCTGCAATCGTGCTACAACT |             |          | 28660     |

The following alignments refer to sequences that have filtered results of  $\geq 80\%$  Identity,  $\geq 80\%$  query coverage, and an E value  $\leq 10$  for the N reverse primer; Total of 3 hits.

### Bat coronavirus RaTG13, complete genome

Sequence ID: [MN996532.1](#) Length: 29855 Number of Matches: 1

Range 1: 28802 to 28821 [GenBank](#) [Graphics](#) [▼ Next Match](#) [▲ Previous Match](#)

| Score         | Expect               | Identities  | Gaps     | Strand     |
|---------------|----------------------|-------------|----------|------------|
| 40.1 bits(20) | 0.47                 | 20/20(100%) | 0/20(0%) | Plus/Minus |
| Query 1       | TGAACTGTTGCGACTACGTG | 20          |          |            |
| Sbjct 28821   | TGAACTGTTGCGACTACGTG |             |          | 28802      |

### Bat SARS-like coronavirus isolate bat-SL-CoVZXC21, complete genome

Sequence ID: [MG772934.1](#) Length: 29732 Number of Matches: 1

Range 1: 28672 to 28691 [GenBank](#) [Graphics](#) [▼ Next Match](#) [▲ Previous Match](#)

| Score         | Expect               | Identities  | Gaps     | Strand     |
|---------------|----------------------|-------------|----------|------------|
| 40.1 bits(20) | 0.47                 | 20/20(100%) | 0/20(0%) | Plus/Minus |
| Query 1       | TGAACTGTTGCGACTACGTG | 20          |          |            |
| Sbjct 28691   | TGAACTGTTGCGACTACGTG |             |          | 28672      |

### Bat SARS-like coronavirus isolate bat-SL-CoVZC45, complete genome

Sequence ID: [MG772933.1](#) Length: 29802 Number of Matches: 1

Range 1: 28741 to 28760 [GenBank](#) [Graphics](#) [▼ Next Match](#) [▲ Previous Match](#)

| Score         | Expect               | Identities  | Gaps     | Strand     |
|---------------|----------------------|-------------|----------|------------|
| 40.1 bits(20) | 0.47                 | 20/20(100%) | 0/20(0%) | Plus/Minus |
| Query 1       | TGAACTGTTGCGACTACGTG | 20          |          |            |
| Sbjct 28760   | TGAACTGTTGCGACTACGTG |             |          | 28741      |

The following alignments refer to sequences that have filtered results of  $\geq 80\%$  Identity,  $\geq 80\%$  query coverage, and an E value  $\leq 10$  for the E forward primer; Total of 21 hits.

### Bat coronavirus RaTG13, complete genome

Sequence ID: [MN996532.1](#) Length: 29855 Number of Matches: 1

Range 1: 26229 to 26249 [GenBank](#) [Graphics](#) [▼ Next Match](#) [▲ Previous Match](#)

| Score         | Expect                | Identities  | Gaps     | Strand    |
|---------------|-----------------------|-------------|----------|-----------|
| 42.1 bits(21) | 0.12                  | 21/21(100%) | 0/21(0%) | Plus/Plus |
| Query 1       | TTCGGAAGAGACAGGTACGTT | 21          |          |           |
|               |                       |             |          |           |
| Sbjct 26229   | TTCGGAAGAGACAGGTACGTT | 26249       |          |           |

### Bat SARS-like coronavirus isolate bat-SL-CoVZXC21, complete genome

Sequence ID: [MG772934.1](#) Length: 29732 Number of Matches: 1

Range 1: 26095 to 26115 [GenBank](#) [Graphics](#) [▼ Next Match](#) [▲ Previous Match](#)

| Score         | Expect                | Identities  | Gaps     | Strand    |
|---------------|-----------------------|-------------|----------|-----------|
| 42.1 bits(21) | 0.12                  | 21/21(100%) | 0/21(0%) | Plus/Plus |
| Query 1       | TTCGGAAGAGACAGGTACGTT | 21          |          |           |
|               |                       |             |          |           |
| Sbjct 26095   | TTCGGAAGAGACAGGTACGTT | 26115       |          |           |

### Bat SARS-like coronavirus isolate bat-SL-CoVZC45, complete genome

Sequence ID: [MG772933.1](#) Length: 29802 Number of Matches: 1

Range 1: 26164 to 26184 [GenBank](#) [Graphics](#) [▼ Next Match](#) [▲ Previous Match](#)

| Score         | Expect                | Identities  | Gaps     | Strand    |
|---------------|-----------------------|-------------|----------|-----------|
| 42.1 bits(21) | 0.12                  | 21/21(100%) | 0/21(0%) | Plus/Plus |
| Query 1       | TTCGGAAGAGACAGGTACGTT | 21          |          |           |
|               |                       |             |          |           |
| Sbjct 26164   | TTCGGAAGAGACAGGTACGTT | 26184       |          |           |

### BtRs-BetaCoV/YN2013, complete genome

Sequence ID: [KJ473816.1](#) Length: 29142 Number of Matches: 1

Range 1: 25831 to 25851 [GenBank](#) [Graphics](#) [▼ Next Match](#) [▲ Previous Match](#)

| Score         | Expect                | Identities  | Gaps     | Strand    |
|---------------|-----------------------|-------------|----------|-----------|
| 42.1 bits(21) | 0.12                  | 21/21(100%) | 0/21(0%) | Plus/Plus |
| Query 1       | TTCGGAAGAGACAGGTACGTT | 21          |          |           |
|               |                       |             |          |           |
| Sbjct 25831   | TTCGGAAGAGACAGGTACGTT | 25851       |          |           |

### BtRs-BetaCoV/GX2013, complete genome

Sequence ID: [KJ473815.1](#) Length: 29161 Number of Matches: 1

Range 1: 25847 to 25867 [GenBank](#) [Graphics](#) [▼ Next Match](#) [▲ Previous Match](#)

| Score         | Expect                | Identities  | Gaps     | Strand    |
|---------------|-----------------------|-------------|----------|-----------|
| 42.1 bits(21) | 0.12                  | 21/21(100%) | 0/21(0%) | Plus/Plus |
| Query 1       | TTCGGAAGAGACAGGTACGTT | 21          |          |           |
|               |                       |             |          |           |
| Sbjct 25847   | TTCGGAAGAGACAGGTACGTT | 25867       |          |           |

### BtRs-BetaCoV/HuB2013, complete genome

Sequence ID: [KJ473814.1](#) Length: 29658 Number of Matches: 1

Range 1: 26021 to 26041 [GenBank](#) [Graphics](#) [▼ Next Match](#) [▲ Previous Match](#)

| Score         | Expect                | Identities  | Gaps     | Strand    |
|---------------|-----------------------|-------------|----------|-----------|
| 42.1 bits(21) | 0.12                  | 21/21(100%) | 0/21(0%) | Plus/Plus |
| Query 1       | TTCGGAAGAGACAGGTACGTT | 21          |          |           |
|               |                       |             |          |           |
| Sbjct 26021   | TTCGGAAGAGACAGGTACGTT | 26041       |          |           |

### SARS-related bat coronavirus isolate Longquan-140 orf1ab polyprotein, spike glycoprotein, envelope protein, membrane protein, and nucleocapsid protein genes, complete cds

Sequence ID: [KF294457.1](#) Length: 29676 Number of Matches: 1

Range 1: 26061 to 26081 [GenBank](#) [Graphics](#) [▼ Next Match](#) [▲ Previous Match](#)

| Score         | Expect                | Identities  | Gaps     | Strand    |
|---------------|-----------------------|-------------|----------|-----------|
| 42.1 bits(21) | 0.12                  | 21/21(100%) | 0/21(0%) | Plus/Plus |
| Query 1       | TTCGGAAGAGACAGGTACGTT | 21          |          |           |
|               |                       |             |          |           |
| Sbjct 26061   | TTCGGAAGAGACAGGTACGTT | 26081       |          |           |

### Bat coronavirus Cp/Yunnan2011, complete genome

Sequence ID: [JX993988.1](#) Length: 29452 Number of Matches: 1

Range 1: 25989 to 26009 [GenBank](#) [Graphics](#) [▼ Next Match](#) [▲ Previous Match](#)

| Score         | Expect | Identities  | Gaps     | Strand    |
|---------------|--------|-------------|----------|-----------|
| 42.1 bits(21) | 0.12   | 21/21(100%) | 0/21(0%) | Plus/Plus |

```
Query 1      TTCGGAAGAGACAGGTACGTT 21
             |||
Sbjct 25989  TTCGGAAGAGACAGGTACGTT 26009
```

### Bat SARS coronavirus HKU3-13, complete genome

Sequence ID: [GQ153548.1](#) Length: 29677 Number of Matches: 1

Range 1: 26045 to 26065 [GenBank](#) [Graphics](#) [▼ Next Match](#) [▲ Previous Match](#)

| Score         | Expect | Identities  | Gaps     | Strand    |
|---------------|--------|-------------|----------|-----------|
| 42.1 bits(21) | 0.12   | 21/21(100%) | 0/21(0%) | Plus/Plus |

```
Query 1      TTCGGAAGAGACAGGTACGTT 21
             |||
Sbjct 26045  TTCGGAAGAGACAGGTACGTT 26065
```

### Bat SARS coronavirus HKU3-12, complete genome

Sequence ID: [GQ153547.1](#) Length: 29704 Number of Matches: 1

Range 1: 26072 to 26092 [GenBank](#) [Graphics](#) [▼ Next Match](#) [▲ Previous Match](#)

| Score         | Expect | Identities  | Gaps     | Strand    |
|---------------|--------|-------------|----------|-----------|
| 42.1 bits(21) | 0.12   | 21/21(100%) | 0/21(0%) | Plus/Plus |

```
Query 1      TTCGGAAGAGACAGGTACGTT 21
             |||
Sbjct 26072  TTCGGAAGAGACAGGTACGTT 26092
```

### Bat SARS coronavirus HKU3-11, complete genome

Sequence ID: [GQ153546.1](#) Length: 29695 Number of Matches: 1

Range 1: 26063 to 26083 [GenBank](#) [Graphics](#) [▼ Next Match](#) [▲ Previous Match](#)

| Score         | Expect | Identities  | Gaps     | Strand    |
|---------------|--------|-------------|----------|-----------|
| 42.1 bits(21) | 0.12   | 21/21(100%) | 0/21(0%) | Plus/Plus |

```
Query 1      TTCGGAAGAGACAGGTACGTT 21
             |||
Sbjct 26063  TTCGGAAGAGACAGGTACGTT 26083
```

### Bat SARS coronavirus HKU3-10, complete genome

Sequence ID: [GQ153545.1](#) Length: 29695 Number of Matches: 1

Range 1: 26063 to 26083 [GenBank](#) [Graphics](#) [▼ Next Match](#) [▲ Previous Match](#)

| Score         | Expect | Identities  | Gaps     | Strand    |
|---------------|--------|-------------|----------|-----------|
| 42.1 bits(21) | 0.12   | 21/21(100%) | 0/21(0%) | Plus/Plus |

```
Query 1      TTCGGAAGAGACAGGTACGTT 21
             |||
Sbjct 26063  TTCGGAAGAGACAGGTACGTT 26083
```

### Bat SARS coronavirus HKU3-9, complete genome

Sequence ID: [GQ153544.1](#) Length: 29695 Number of Matches: 1

Range 1: 26063 to 26083 [GenBank](#) [Graphics](#) [▼ Next Match](#) [▲ Previous Match](#)

| Score         | Expect | Identities  | Gaps     | Strand    |
|---------------|--------|-------------|----------|-----------|
| 42.1 bits(21) | 0.12   | 21/21(100%) | 0/21(0%) | Plus/Plus |

```
Query 1      TTCGGAAGAGACAGGTACGTT 21
             |||
Sbjct 26063  TTCGGAAGAGACAGGTACGTT 26083
```

### Bat SARS coronavirus HKU3-8, complete genome

Sequence ID: [GQ153543.1](#) Length: 29681 Number of Matches: 1

Range 1: 26075 to 26095 [GenBank](#) [Graphics](#) [▼ Next Match](#) [▲ Previous Match](#)

| Score         | Expect | Identities  | Gaps     | Strand    |
|---------------|--------|-------------|----------|-----------|
| 42.1 bits(21) | 0.12   | 21/21(100%) | 0/21(0%) | Plus/Plus |

```
Query 1      TTCGGAAGAGACAGGTACGTT 21
             |||
Sbjct 26075  TTCGGAAGAGACAGGTACGTT 26095
```

### Bat SARS coronavirus HKU3-7, complete genome

Sequence ID: [GQ153542.1](#) Length: 29716 Number of Matches: 1

Range 1: 26084 to 26104 [GenBank](#) [Graphics](#) [▼ Next Match](#) [▲ Previous Match](#)

| Score         | Expect | Identities  | Gaps     | Strand    |
|---------------|--------|-------------|----------|-----------|
| 42.1 bits(21) | 0.12   | 21/21(100%) | 0/21(0%) | Plus/Plus |

```
Query 1      TTCGGAAGAGACAGGTACGTT 21
             |||
Sbjct 26084  TTCGGAAGAGACAGGTACGTT 26104
```

### Bat SARS coronavirus HKU3-6, complete genome

Sequence ID: [GQ153541.1](#) Length: 29704 Number of Matches: 1

Range 1: 26072 to 26092 [GenBank](#) [Graphics](#) [▼ Next Match](#) [▲ Previous Match](#)

| Score         | Expect | Identities  | Gaps     | Strand    |
|---------------|--------|-------------|----------|-----------|
| 42.1 bits(21) | 0.12   | 21/21(100%) | 0/21(0%) | Plus/Plus |

```
Query 1      TTCGGAAGAGACAGGTACGTT 21
             |||
Sbjct 26072  TTCGGAAGAGACAGGTACGTT 26092
```

### Bat SARS coronavirus HKU3-5, complete genome

Sequence ID: [GQ153540.1](#) Length: 29704 Number of Matches: 1

Range 1: 26072 to 26092 [GenBank](#) [Graphics](#) [▼ Next Match](#) [▲ Previous Match](#)

| Score         | Expect | Identities  | Gaps     | Strand    |
|---------------|--------|-------------|----------|-----------|
| 42.1 bits(21) | 0.12   | 21/21(100%) | 0/21(0%) | Plus/Plus |

```
Query 1      TTCGGAAGAGACAGGTACGTT 21
             |||
Sbjct 26072  TTCGGAAGAGACAGGTACGTT 26092
```

### Bat SARS coronavirus HKU3-4, complete genome

Sequence ID: [GQ153539.1](#) Length: 29704 Number of Matches: 1

Range 1: 26072 to 26092 [GenBank](#) [Graphics](#) [▼ Next Match](#) [▲ Previous Match](#)

| Score         | Expect | Identities  | Gaps     | Strand    |
|---------------|--------|-------------|----------|-----------|
| 42.1 bits(21) | 0.12   | 21/21(100%) | 0/21(0%) | Plus/Plus |

```
Query 1      TTCGGAAGAGACAGGTACGTT 21
             |||
Sbjct 26072  TTCGGAAGAGACAGGTACGTT 26092
```

### bat SARS coronavirus HKU3-3, complete genome

Sequence ID: [DQ084200.1](#) Length: 29711 Number of Matches: 1

Range 1: 26055 to 26075 [GenBank](#) [Graphics](#) [▼ Next Match](#) [▲ Previous Match](#)

| Score         | Expect | Identities  | Gaps     | Strand    |
|---------------|--------|-------------|----------|-----------|
| 42.1 bits(21) | 0.12   | 21/21(100%) | 0/21(0%) | Plus/Plus |

```
Query 1      TTCGGAAGAGACAGGTACGTT 21
             |||
Sbjct 26055  TTCGGAAGAGACAGGTACGTT 26075
```

### Bat SARS coronavirus HKU3-1, complete genome

Sequence ID: [DQ022305.2](#) Length: 29728 Number of Matches: 1

Range 1: 26072 to 26092 [GenBank](#) [Graphics](#)

[▼ Next Match](#) [▲ Previous Match](#)

| Score         | Expect                | Identities  | Gaps     | Strand    |
|---------------|-----------------------|-------------|----------|-----------|
| 42.1 bits(21) | 0.12                  | 21/21(100%) | 0/21(0%) | Plus/Plus |
| Query 1       | TTCGGAAGAGACAGGTACGTT | 21          |          |           |
| Sbjct 26072   | TTCGGAAGAGACAGGTACGTT | 26092       |          |           |

### bat SARS coronavirus HKU3-2, complete genome

Sequence ID: [DQ084199.1](#) Length: 29687 Number of Matches: 1

Range 1: 26055 to 26075 [GenBank](#) [Graphics](#)

[▼ Next Match](#) [▲ Previous Match](#)

| Score         | Expect                | Identities  | Gaps     | Strand    |
|---------------|-----------------------|-------------|----------|-----------|
| 42.1 bits(21) | 0.12                  | 21/21(100%) | 0/21(0%) | Plus/Plus |
| Query 1       | TTCGGAAGAGACAGGTACGTT | 21          |          |           |
| Sbjct 26055   | TTCGGAAGAGACAGGTACGTT | 26075       |          |           |

The following alignments refer to sequences that have filtered results of  $\geq 80\%$  Identity,  $\geq 80\%$  query coverage, and an E value  $\leq 10$  for the E reverse primer; Total of 3 hits.

### SARS coronavirus ExoN1 strain SARS/VeroE6\_lab/USA/ExoN1\_c5.7P20/2010, complete genome

Sequence ID: [KF514407.1](#) Length: 29689 Number of Matches: 1

Range 1: 26198 to 26217 [GenBank](#) [Graphics](#)

[▼ Next Match](#) [▲ Previous Match](#)

| Score         | Expect               | Identities  | Gaps     | Strand     |
|---------------|----------------------|-------------|----------|------------|
| 40.1 bits(20) | 0.47                 | 20/20(100%) | 0/20(0%) | Plus/Minus |
| Query 1       | CACACAATCGATGCGCAGTA | 20          |          |            |
| Sbjct 26217   | CACACAATCGATGCGCAGTA | 26198       |          |            |

### SARS coronavirus ExoN1 isolate c5P10, complete genome

Sequence ID: [JX162087.1](#) Length: 29688 Number of Matches: 1

Range 1: 26198 to 26217 [GenBank](#) [Graphics](#)

[▼ Next Match](#) [▲ Previous Match](#)

| Score         | Expect               | Identities  | Gaps     | Strand     |
|---------------|----------------------|-------------|----------|------------|
| 40.1 bits(20) | 0.47                 | 20/20(100%) | 0/20(0%) | Plus/Minus |
| Query 1       | CACACAATCGATGCGCAGTA | 20          |          |            |
| Sbjct 26217   | CACACAATCGATGCGCAGTA | 26198       |          |            |

### SARS coronavirus ExoN1 isolate P3pp53, complete genome

Sequence ID: [FJ882956.1](#) Length: 29644 Number of Matches: 1

Range 1: 26178 to 26197 [GenBank](#) [Graphics](#)

[▼ Next Match](#) [▲ Previous Match](#)

| Score         | Expect               | Identities  | Gaps     | Strand     |
|---------------|----------------------|-------------|----------|------------|
| 40.1 bits(20) | 0.47                 | 20/20(100%) | 0/20(0%) | Plus/Minus |
| Query 1       | CACACAATCGATGCGCAGTA | 20          |          |            |
| Sbjct 26197   | CACACAATCGATGCGCAGTA | 26178       |          |            |
