# Supplementary material for: Development and Implementation of a scalable and versatile test for COVID-19 diagnostics in rural communities
Source: bioRxiv or medRxiv preprint supplement (doi:10.1101/2021.03.01.21252679), 2021-03-08
Supplement: Supplementary file [file media-9.pdf]

Supplementary Table X

| Sample ID | Ct <sub>N</sub> | Ct <sub>E</sub> | Ct <sub>S</sub> | Ct <sub>RPP30</sub> | Cut-off N | Cut-off RPP30 | CDC N1 Ct | CDC N2 Ct | Agreement? |
|-----------|-----------------|-----------------|-----------------|---------------------|-----------|---------------|-----------|-----------|------------|
| V0001455  | 18.82           | 20.85           | 21.45           | 28.45               | 36.51     | 38.26         | 17.3      | 17.2      | YES        |
| V0001531  | 42.23           | --              | 38.93           | 27.64               | 37.07     | 38.34         | --        | --        | YES        |
| V0001533  | --              | 40.97           | 40.09           | 27.44               | 37.07     | 38.34         | --        | --        | YES        |
| V0001537  | 37.86           | --              | 39.73           | 27.11               | 37.07     | 38.34         | --        | --        | YES        |
| V0001547  | 44.16           | --              | 40.36           | 26.01               | 37.07     | 38.34         | --        | --        | YES        |
| V0001550  | --              | 44.64           | 41.39           | 27.80               | 37.07     | 38.34         | --        | --        | YES        |
| V0001730  | --              | --              | --              | 29.32               | 35.60     | 35.42         | --        | --        | YES        |
| V0001792  | 24.59           | 25.37           | 25.74           | 32.37               | 33.94     | 36.13         | 18.5      | 18.5      | YES        |
| V0001939  | --              | --              | --              | 26.94               | 37.07     | 38.34         | --        | --        | YES        |
| V0001947  | 34.55           | 34.63           | 33.77           | 29.87               | 36.61     | 34.36         | 30.8      | 31.2      | YES        |
| V0002420  | --              | --              | 36.12           | 27.13               | 37.07     | 38.34         | --        | --        | YES        |
| V0002422  | --              | --              | --              | 29.47               | 37.07     | 38.34         | --        | --        | YES        |
| V0002449  | 38.09           | 42.18           | 43.74           | 27.50               | 37.07     | 38.34         | --        | --        | YES        |
| V0002450  | 43.12           | --              | 38.56           | 26.24               | 37.07     | 38.34         | --        | --        | YES        |
| V0002455  | 39.45           | --              | 44.77           | 27.56               | 37.07     | 38.34         | --        | --        | YES        |
| V0002456  | --              | 43.03           | 39.87           | 27.0                | 37.07     | 38.34         | --        | --        | YES        |
| V0002457  | --              | --              | --              | 29.77               | 37.07     | 38.34         | --        | --        | YES        |
| V0002458  | --              | 42.44           | 39.81           | 28.20               | 37.07     | 38.34         | --        | --        | YES        |
| V0002459  | 43.94           | --              | 41.70           | 27.75               | 37.07     | 38.34         | --        | --        | YES        |
| V0002460  | 42.24           | --              | --              | 28.31               | 37.07     | 38.34         | --        | --        | YES        |
| V0002463  | 40.38           | --              | 38.49           | 27.16               | 37.07     | 38.34         | --        | --        | YES        |
| V0002466  | 43.73           | --              | 43.25           | 27.04               | 37.07     | 38.34         | --        | --        | YES        |
| V0002467  | 43.59           | 42.54           | 39.57           | 26.37               | 37.07     | 38.34         | --        | --        | YES        |
| V0002470  | --              | 41.07           | 39.11           | 28.07               | 37.07     | 38.34         | --        | --        | YES        |
| V0002471  | --              | --              | --              | 27.54               | 37.07     | 38.34         | --        | --        | YES        |
| V0002472  | --              | --              | 44.41           | 27.97               | 37.07     | 38.34         | --        | --        | YES        |
| V0002474  | 37.34           | --              | 40.06           | 28.02               | 37.07     | 38.34         | --        | --        | YES        |
| V0002475  | --              | --              | 42.54           | 28.14               | 37.07     | 38.34         | --        | --        | YES        |
| V0002478  | 41.09           | --              | --              | 27.57               | 37.07     | 38.34         | --        | 40.6      | YES        |
| V0002479  | 41.29           | --              | 40.19           | 26.76               | 37.07     | 38.34         | --        | --        | YES        |
| V0002481  | --              | --              | 43.63           | 28.02               | 37.07     | 38.34         | --        | --        | YES        |
| V0002482  | --              | --              | 43.37           | 28.40               | 37.07     | 38.34         | --        | --        | YES        |
| V0002483  | --              | --              | 37.84           | 27.52               | 37.07     | 38.34         | --        | --        | YES        |
| V0002487  | --              | --              | 40.31           | 27.73               | 37.07     | 38.34         | --        | --        | YES        |
| V0002489  | --              | --              | 39.34           | 27.80               | 37.07     | 38.34         | --        | --        | YES        |
| V0002510  | --              | 37.3            | --              | 29.31               | 35.60     | 35.42         | --        | --        | YES        |
| V0002520  | --              | 36.45           | --              | 27.37               | 35.60     | 35.42         | --        | --        | YES        |
| V0003324  | 41.12           | --              | --              | 28.02               | 35.60     | 35.42         | --        | --        | YES        |
| V0003341  | --              | --              | --              | 29.35               | 35.60     | 35.42         | --        | --        | YES        |
| V0003371  | 31.62           | 31.51           | 31.89           | 31.11               | 33.65     | 35.31         | 27.6      | 27.6      | YES        |
| V0003376  | 27.54           | 27.62           | 27.84           | 29.89               | 33.65     | 35.31         | 23.5      | 23.5      | YES        |
| V0004170  | 24.56           | 24.79           | 24.88           | 32.41               | 34.36     | 34.94         | 15.6      | 16.0      | YES        |
| V0004173  | 20.57           | 21.52           | 21.40           | 29.37               | 34.34     | 35.47         | 16.6      | 16.6      | YES        |
| V0004179  | 25.08           | 25.83           | 25.28           | 29.48               | 34.34     | 35.47         | 20.1      | 20.2      | YES        |
| V0004182  | 24.92           | 27.03           | 26.47           | 33.53               | 36.77     | 37.91         | 17.2      | 17.2      | YES        |
| V0004184  | 30.47           | 34.66           | 33.28           | 34.83               | 36.77     | 37.91         | 21.5      | 21.5      | YES        |
| V0004191  | 26.14           | 27.90           | 27.32           | 35.26               | 36.77     | 37.91         | 17.1      | 16.8      | YES        |
| V0004195  | 31.10           | 32.23           | 31.44           | 34.49               | 36.77     | 37.91         | 22.3      | 21.8      | YES        |
| V0004196  | 27.93           | 28.04           | 27.70           | 33.62               | 34.34     | 35.47         | 21.9      | 21.5      | YES        |
| V0004197  | 32.24           | 32.65           | 32.40           | 28.32               | 34.34     | 35.47         | 27.2      | 27.7      | YES        |

|          |       |       |       |       |       |       |      |      |     |
|----------|-------|-------|-------|-------|-------|-------|------|------|-----|
| V0004198 | 34.38 | 36.20 | 35.54 | 35.49 | 36.77 | 37.91 | 23.5 | 23.4 | YES |
| V0004199 | 31.72 | 31.90 | 32.85 | 38.66 | 34.36 | 34.94 | 16.4 | 16.7 | YES |
| V0004200 | 28.88 | 31.17 | 30.35 | 36.05 | 36.77 | 37.91 | 18.3 | 18.3 | YES |
| V0004201 | 26.63 | 28.49 | 28.30 | 35.37 | 36.77 | 37.91 | 15.8 | 16.3 | YES |
| V0004202 | 28.61 | 30.30 | 29.32 | 34.53 | 36.77 | 37.91 | 20.2 | 19.9 | YES |
| V0004205 | 23.02 | 25.07 | 23.98 | 35.68 | 36.77 | 37.91 | 15.7 | 16.1 | YES |
| V0004222 | 25.38 | 25.19 | 24.93 | 30.17 | 34.34 | 35.47 | 19.7 | 19.4 | YES |
| V0004230 | 30.65 | 30.97 | 30.80 | 36.19 | 34.36 | 34.94 | 19.9 | 19.0 | YES |
| V0004251 | 24.59 | 25.98 | 25.88 | 30.82 | 34.34 | 35.47 | 19.6 | 19.5 | YES |
| V0004258 | 27.57 | 28.01 | 27.68 | 29.81 | 34.34 | 35.47 | 19.8 | 21.0 | YES |
| V0004309 | 27.01 | 29.15 | 29.49 | 31.88 | 34.36 | 34.94 | 18.7 | 18.9 | YES |
| V0004312 | 32.22 | 32.34 | 32.40 | 36.22 | 34.36 | 34.94 | 22.3 | 22.0 | YES |
| V0004313 | 30.03 | 30.15 | 29.97 | 26.41 | 34.34 | 35.47 | 26.2 | 25.9 | YES |
| V0004318 | 21.42 | 24.36 | 23.99 | 35.36 | 36.77 | 37.91 | 15.5 | 16.3 | YES |
| V0004319 | 20.52 | 22.66 | 21.72 | 26.81 | 34.36 | 34.94 | 16.6 | 17.4 | YES |
| V0004323 | 24.92 | 25.96 | 26.55 | 34.11 | 34.36 | 34.94 | 16.1 | 16.3 | YES |
| V0004324 | 26.08 | 28.82 | 28.41 | 34.26 | 36.77 | 37.91 | 16.3 | 17.0 | YES |
| V0004329 | 30.18 | 30.68 | 30.17 | 30.80 | 34.34 | 35.47 | 35.1 | 38.1 | YES |
| V0004338 | 29.38 | 31.72 | 31.61 | 34.37 | 36.77 | 37.91 | 20.1 | 20.2 | YES |
| V0004342 | 21.86 | 24.98 | 24.99 | 35.27 | 36.77 | 37.91 | 15.6 | 16.4 | YES |
| V0004344 | 27.40 | 29.58 | 28.63 | 35.93 | 36.77 | 37.91 | 16.7 | 17.5 | YES |
| V0004349 | 27.18 | 30.11 | 29.70 | 36.25 | 36.77 | 37.91 | 17.4 | 17.6 | YES |
| V0004352 | 25.46 | 26.81 | 27.03 | 35.10 | 34.36 | 34.94 | 15.9 | 15.9 | YES |
| V0004360 | 32.69 | 34.27 | 35.14 | 34.44 | 34.36 | 34.94 | 23.0 | 22.8 | YES |
| V0004364 | 26.04 | 28.54 | 28.02 | 34.92 | 36.77 | 37.91 | 16.4 | 16.7 | YES |
| V0004365 | 28.43 | 29.83 | 29.05 | 36.5  | 36.77 | 37.91 | 18.9 | 18.6 | YES |
| V0004366 | 32.46 | 31.49 | 31.89 | 36.64 | 34.36 | 34.94 | 16.4 | 16.9 | YES |
| V0004368 | 23.71 | 24.54 | 24.66 | 30.76 | 34.34 | 35.47 | 17.4 | 17.3 | YES |
| V0004380 | 26.66 | 27.33 | 27.07 | 37.34 | 34.36 | 34.94 | 15.8 | 16.0 | YES |
| V0004565 | 29.14 | 31.81 | 31.29 | 35.13 | 36.77 | 37.91 | 17.7 | 17.9 | YES |
| V0004567 | 22.30 | 22.64 | 22.43 | 28.68 | 34.34 | 35.47 | 18.2 | 18.2 | YES |
