# Supplementary material for: Development and Implementation of a scalable and versatile test for COVID-19 diagnostics in rural communities
Source: bioRxiv or medRxiv preprint supplement (doi:10.1101/2021.03.01.21252679), 2021-03-08
Supplement: Supplementary file [file media-10.pdf]

Supplementary Table XIV

A.

|                      |   | Pooled Result |    |
|----------------------|---|---------------|----|
|                      |   | -             | +  |
| Individual<br>Result | - | 20            | 0  |
|                      | + | 0             | 21 |

B.

| Gene     | Slope | Lower 95% CI | Upper 95% CI |
|----------|-------|--------------|--------------|
| <i>N</i> | 0.94  | 0.86         | 1.11         |
| <i>E</i> | 0.96  | 0.83         | 1.10         |
| <i>S</i> | 0.98  | 0.84         | 1.17         |
