# Supplementary material for: Development and Implementation of a scalable and versatile test for COVID-19 diagnostics in rural communities
Source: bioRxiv or medRxiv preprint supplement (doi:10.1101/2021.03.01.21252679), 2021-03-08
Supplement: Supplementary file [file media-11.pdf]

Supplementary Table XVI

|                       |                             | MRHD                  | NRVHD                 | FHD       |
|-----------------------|-----------------------------|-----------------------|-----------------------|-----------|
| Demographics*         | Population                  | 187,324               | 182,147               | 1,147,532 |
|                       | Median age                  | 47.4                  | 34.4                  | 38.4      |
|                       | Population under 18         | 19%                   | 16%                   | 23%       |
|                       | Population 18-64            | 58%                   | 67%                   | 63%       |
|                       | Population +65              | 23%                   | 16%                   | 14%       |
|                       | Per capita income           | 25073                 | 28,210                | 57,492    |
|                       | Median household income     | 44600                 | 55825                 | 128374    |
|                       | Persons below poverty line  | 14.80%                | 21.1                  | 6%        |
|                       | High school or higher       | 84.6%                 | 91.90%                | 92.70%    |
|                       | Bachelor's degree or higher | 21%                   | 34.80%                | 62.40%    |
|                       | Veteran status              | 8.80%                 | 5.90%                 | 8.50%     |
| Clinical data         |                             |                       |                       |           |
|                       | Uninsured*                  | 10.50%                | 6.97%                 | 8.18%     |
|                       | Medicaid*                   | 15.60%                | 9.08%                 | 6.03%     |
|                       | Medicare*                   | 18%                   | 12.20%                | 8.36%     |
|                       | Employer coverage*          | 40.9                  | 54.60%                | 58.40%    |
|                       | Military or VA*             | 2.09%                 | 2.07%                 | 3.81%     |
|                       | ICU beds**                  | 16                    | 35                    | 333       |
| ICU bed per capita*** | 11,708 people to 1 bed      | 5,204 people to 1 bed | 3,446 people to 1 bed |           |
