# Supplementary material for: Development and Implementation of a scalable and versatile test for COVID-19 diagnostics in rural communities
Source: bioRxiv or medRxiv preprint supplement (doi:10.1101/2021.03.01.21252679), 2021-03-08
Supplement: Supplementary file [file media-12.pdf]

Pool\_raw\_data

| A         | B                  | CTRPP             | D                | E                | F                | G          | H             | I                  | J                 | K                | L                | M                | N          | O             | P                  | Q                 | R                | S                | T                | U          | V             | W                  | X                 | Y                | Z                | AA               | AB         | AC            | AD                 | AE                | AF               | AG               | AH               | AI         | AJ            |                   |
|-----------|--------------------|-------------------|------------------|------------------|------------------|------------|---------------|--------------------|-------------------|------------------|------------------|------------------|------------|---------------|--------------------|-------------------|------------------|------------------|------------------|------------|---------------|--------------------|-------------------|------------------|------------------|------------------|------------|---------------|--------------------|-------------------|------------------|------------------|------------------|------------|---------------|-------------------|
| Pool name | Original test date | Sample 1          |                  |                  |                  | cut-off N2 | cut-off RPP30 | Original test date | Sample 2          |                  |                  |                  | cut-off N2 | cut-off RPP30 | Original test date | Sample 3          |                  |                  |                  | cut-off N2 | cut-off RPP30 | Original test date | Sample 4          |                  |                  |                  | cut-off N2 | cut-off RPP30 | Original test date | Pool              |                  |                  |                  | cut-off N2 | cut-off RPP30 |                   |
|           |                    | Ct <sub>RPP</sub> | Ct <sub>N2</sub> | Ct <sub>E1</sub> | Ct <sub>S6</sub> |            |               |                    | Ct <sub>RPP</sub> | Ct <sub>N2</sub> | Ct <sub>E1</sub> | Ct <sub>S6</sub> |            |               |                    | Ct <sub>RPP</sub> | Ct <sub>N2</sub> | Ct <sub>E1</sub> | Ct <sub>S6</sub> |            |               |                    | Ct <sub>RPP</sub> | Ct <sub>N2</sub> | Ct <sub>E1</sub> | Ct <sub>S6</sub> |            |               |                    | Ct <sub>RPP</sub> | Ct <sub>N2</sub> | Ct <sub>E1</sub> | Ct <sub>S6</sub> |            |               | Ct <sub>RPP</sub> |
| 1N        | 29.65              | N/A               | N/A              | N/A              | 34.78            | 35.37      |               |                    | 30.66             | N/A              | N/A              | N/A              | 34.78      | 35.37         |                    | 26.43             | N/A              | N/A              | 44.16            | 34.78      | 35.37         |                    | 23.62             | N/A              | N/A              | 41.22            | 34.78      | 35.37         |                    | 27.49             | 27.49            | N/A              | N/A              | 35.45      | 36.50         |                   |
| 2N        | 32.04              | N/A               | N/A              | N/A              | 34.78            | 35.37      |               |                    | 29.48             | 38.87            | N/A              | N/A              | 34.78      | 35.37         |                    | 27.93             | 39.49            | N/A              | 42.52            | 34.78      | 35.37         |                    | 28.55             | N/A              | N/A              | N/A              | 34.78      | 35.37         |                    | 28.20             | 43.22            | N/A              | N/A              | 38.33      | 35.45         | 36.50             |
| 3N        | 29.14              | N/A               | N/A              | N/A              | 34.78            | 35.37      |               |                    | 30.17             | 44.61            | N/A              | N/A              | 34.78      | 35.37         |                    | 29.06             | N/A              | N/A              | N/A              | 34.78      | 35.37         |                    | 29.13             | N/A              | N/A              | 37.27            | 34.78      | 35.37         |                    | 28.99             | N/A              | N/A              | N/A              | 35.45      | 36.50         |                   |
| 4N        | 29.08              | 43.23             | N/A              | N/A              | 34.78            | 35.37      |               |                    | 28.23             | N/A              | N/A              | N/A              | 40.97      | 34.78         | 35.37              |                   | 31.01            | N/A              | N/A              | N/A        | 34.78         | 35.37              |                   | 29.73            | N/A              | N/A              | 41.21      | 34.78         | 35.37              |                   | 29.10            | N/A              | N/A              | 44.81      | 35.45         | 36.50             |
| 5N        | 28.40              | N/A               | 43.83            | 43.58            | 34.78            | 35.37      |               |                    | 29.67             | N/A              | N/A              | 40.24            | 34.78      | 35.37         |                    | 29.14             | N/A              | N/A              | N/A              | 34.78      | 35.37         |                    | 29.15             | N/A              | N/A              | 38.58            | 34.78      | 35.37         |                    | 28.54             | N/A              | N/A              | 37.38            | 35.45      | 36.50         |                   |
| 6N        | 32.08              | N/A               | N/A              | N/A              | 34.78            | 35.37      |               |                    | 30.35             | N/A              | N/A              | 40.00            | 34.78      | 35.37         |                    | 29.44             | 38.40            | 40.34            | N/A              | 34.78      | 35.37         |                    | 29.45             | N/A              | N/A              | 41.71            | 34.86      | 34.75         |                    | 29.97             | N/A              | N/A              | N/A              | 35.45      | 36.50         |                   |
| 7N        | 29.17              | N/A               | N/A              | N/A              | 34.86            | 34.75      |               |                    | 30.81             | N/A              | N/A              | N/A              | 34.86      | 34.75         |                    | 29.33             | N/A              | N/A              | N/A              | 34.86      | 34.75         |                    | 30.38             | N/A              | 37.10            | 39.72            | 34.86      | 34.75         |                    | 29.28             | 38.82            | N/A              | N/A              | 35.45      | 36.50         |                   |
| 8N        | 27.52              | N/A               | 43.27            | N/A              | 34.86            | 34.75      |               |                    | 30.64             | N/A              | N/A              | N/A              | 34.86      | 34.75         |                    | 27.81             | N/A              | N/A              | 40.70            | 34.86      | 34.75         |                    | 28.70             | N/A              | N/A              | 40.85            | 34.86      | 34.75         |                    | 29.26             | N/A              | N/A              | N/A              | 35.45      | 36.50         |                   |
| 9N        | 30.52              | N/A               | N/A              | N/A              | 34.86            | 34.75      |               |                    | 30.88             | N/A              | N/A              | N/A              | 34.86      | 34.75         |                    | 30.29             | 37.16            | N/A              | N/A              | 34.86      | 34.75         |                    | 31.64             | N/A              | N/A              | N/A              | 34.86      | 34.75         |                    | 29.84             | N/A              | N/A              | 40.30            | 35.45      | 36.50         |                   |
| 10N       | 28.02              | N/A               | N/A              | N/A              | 34.86            | 34.75      |               |                    | 28.38             | N/A              | N/A              | 43.41            | 34.86      | 34.75         |                    | 29.17             | N/A              | N/A              | N/A              | 34.86      | 34.75         |                    | 31.14             | N/A              | N/A              | 40.94            | 34.86      | 34.75         |                    | 28.10             | N/A              | N/A              | 37.62            | 35.45      | 36.50         |                   |
| 11N       | 27.38              | N/A               | N/A              | N/A              | 34.78            | 35.37      |               |                    | 31.39             | N/A              | N/A              | N/A              | 34.86      | 34.75         |                    | 29.46             | N/A              | N/A              | N/A              | 34.86      | 34.75         |                    | 29.62             | 36.24            | 37.70            | 41.67            | 34.86      | 34.75         |                    | 28.37             | N/A              | N/A              | 43.20            | 35.45      | 36.50         |                   |
| 12N       | 31.82              | N/A               | 37.02            | N/A              | 34.86            | 34.75      |               |                    | 31.16             | N/A              | N/A              | N/A              | 34.86      | 34.75         |                    | 30.27             | N/A              | N/A              | 39.80            | 34.86      | 34.75         |                    | 30.44             | N/A              | N/A              | N/A              | 34.86      | 34.75         |                    | 30.37             | 42.20            | N/A              | 37.71            | 35.45      | 36.50         |                   |
| 13N       | 30.12              | N/A               | N/A              | 41.78            | 34.78            | 35.37      |               |                    | 28.47             | 39.42            | N/A              | N/A              | 34.78      | 35.37         |                    | 27.05             | N/A              | N/A              | 38.24            | 34.78      | 35.37         |                    | 28.80             | N/A              | N/A              | 44.72            | 34.78      | 35.37         |                    | 28.10             | N/A              | N/A              | N/A              | 35.45      | 36.50         |                   |
| 14N       | 30.14              | N/A               | N/A              | N/A              | 34.78            | 35.37      |               |                    | 29.53             | 42.71            | N/A              | N/A              | 34.78      | 35.37         |                    | 28.44             | N/A              | N/A              | 44.75            | 34.78      | 35.37         |                    | 27.16             | N/A              | N/A              | 42.08            | 34.78      | 35.37         |                    | 28.14             | N/A              | N/A              | 41.68            | 35.45      | 36.50         |                   |
| 15N       | 30.59              | N/A               | N/A              | N/A              | 34.86            | 34.75      |               |                    | 28.02             | N/A              | N/A              | 42.06            | 34.57      | 35.53         |                    | 27.35             | N/A              | N/A              | 40.98            | 34.57      | 35.53         |                    | 28.56             | 44.14            | N/A              | N/A              | 34.57      | 35.53         |                    | 27.48             | N/A              | N/A              | 38.61            | 35.45      | 36.50         |                   |
| 16N       | 34.93              | N/A               | N/A              | N/A              | 34.78            | 35.37      |               |                    | 29.22             | N/A              | 36.63            | N/A              | 34.78      | 35.37         |                    | 27.68             | N/A              | N/A              | 43.37            | 34.78      | 35.37         |                    | 28.81             | N/A              | N/A              | N/A              | 34.78      | 35.37         |                    | 28.43             | N/A              | 41.70            | N/A              | 34.84      | 37.00         |                   |
| 17N       | 28.97              | N/A               | N/A              | N/A              | 34.86            | 34.75      |               |                    | 28.22             | N/A              | N/A              | 41.10            | 34.86      | 34.75         |                    | 28.56             | N/A              | N/A              | 39.98            | 34.86      | 34.75         |                    | 28.42             | N/A              | N/A              | N/A              | 34.86      | 34.75         |                    | 28.13             | N/A              | N/A              | N/A              | 34.84      | 37.00         |                   |
| 18N       | 30.30              | 41.06             | N/A              | N/A              | 34.62            | 35.53      |               |                    | 31.55             | N/A              | N/A              | N/A              | 34.86      | 34.75         |                    | 29.71             | 36.96            | N/A              | N/A              | 34.86      | 34.75         |                    | 29.12             | N/A              | N/A              | N/A              | 34.86      | 34.75         |                    | 29.32             | N/A              | N/A              | N/A              | 34.84      | 37.00         |                   |
| 19N       | 28.61              | N/A               | N/A              | 40.87            | 34.83            | 36.97      |               |                    | 29.38             | 41.11            | N/A              | N/A              | 34.83      | 36.97         |                    | 28.51             | N/A              | N/A              | N/A              | 34.83      | 36.97         |                    | 29.18             | N/A              | N/A              | 44.22            | 34.83      | 36.97         |                    | 28.64             | N/A              | N/A              | 42.16            | 34.84      | 37.00         |                   |
| 20N       | 29.54              | N/A               | N/A              | 38.64            | 34.83            | 36.97      |               |                    | 28.95             | N/A              | N/A              | 43.42            | 34.83      | 36.97         |                    | 31.05             | N/A              | 39.29            | N/A              | 34.83      | 36.97         |                    | 29.57             | N/A              | N/A              | N/A              | 34.83      | 36.97         |                    | 30.06             | N/A              | N/A              | N/A              | 34.84      | 37.00         |                   |
| 1P        | 27.99              | 25.93             | 28.19            | 28.31            | 34.85            | 36.50      |               |                    | 30.66             | N/A              | N/A              | N/A              | 34.83      | 36.97         |                    | 26.43             | N/A              | N/A              | 44.16            | 34.83      | 36.97         |                    | 23.62             | N/A              | N/A              | 41.22            | 34.83      | 36.97         |                    | 27.66             | 28.73            | 30.42            | 30.70            | 35.45      | 36.50         |                   |
| 2P        | 30.23              | 19.81             | 20.86            | 21.52            | 35.05            | 36.98      |               |                    | 30.64             | N/A              | N/A              | N/A              | 34.83      | 36.97         |                    | 27.81             | N/A              | N/A              | 40.70            | 34.83      | 36.97         |                    | 28.70             | N/A              | N/A              | 40.85            | 34.83      | 36.97         |                    | 28.87             | 23.25            | 24.25            | 25.45            | 35.45      | 36.50         |                   |
| 3P        | 30.50              | 20.67             | 20.84            | 20.54            | 35.45            | 36.50      |               |                    | 28.38             | N/A              | N/A              | 43.41            | 34.83      | 36.97         |                    | 29.17             | N/A              | N/A              | N/A              | 34.83      | 36.97         |                    | 31.14             | N/A              | N/A              | 40.94            | 34.83      | 36.97         |                    | 29.01             | 20.31            | 20.61            | 20.46            | 35.45      | 36.50         |                   |
| 4P        | 27.63              | 32.52             | 33.79            | 34.24            | 34.75            | 34.73      |               |                    | 25.68             | 36.67            | N/A              | 36.33            | 34.75      | 34.73         |                    | 27.20             | 36.60            | 44.43            | 44.24            | 34.75      | 34.73         |                    | 27.27             | 44.23            | N/A              | 41.82            | 34.75      | 34.73         |                    | 27.08             | 33.09            | 34.22            | 34.70            | 35.82      | 34.13         |                   |
| 5P        | 28.43              | 15.32             | 16.49            | 16.58            | 34.82            | 38.17      |               |                    | 26.46             | 41.00            | 41.41            | 40.55            | 34.82      | 38.17         |                    | 29.24             | N/A              | N/A              | N/A              | 34.82      | 38.17         |                    | 27.30             | 42.96            | 44.99            | 41.84            | 34.82      | 38.17         |                    | 28.82             | 18.01            | 18.74            | 18.38            | 35.82      | 34.13         |                   |
| 6P        | 29.03              | 26.65             | 28.78            | 29.38            | 34.82            | 38.17      |               |                    | 27.17             | 36.47            | 36.01            | 42.53            | 34.82      | 38.17         |                    | 27.35             | N/A              | N/A              | 38.54            | 34.82      | 38.17         |                    | 29.59             | N/A              | N/A              | 41.82            | 34.82      | 38.17         |                    | 28.07             | 29.18            | 30.90            | 31.17            | 35.82      | 34.13         |                   |
| 7P        | 29.10              | 21.48             | 23.29            | 23.16            | 35.36            | 37.96      |               |                    | 29.99             | N/A              | N/A              | N/A              | 35.36      | 37.96         |                    | 28.23             | 42.18            | N/A              | N/A              | 35.36      | 37.96         |                    | 27.83             | N/A              | 42.17            | 37.90            | 35.36      | 37.96         |                    | 29.04             | 23.68            | 25.06            | 24.96            | 35.82      | 34.13         |                   |
| 8P        | 29.60              | 32.91             | 33.68            | 33.48            | 35.36            | 37.96      |               |                    | 29.50             | N/A              | N/A              | 39.25            | 35.36      | 37.96         |                    | 28.65             | 35.15            | 37.22            | 44.27            | 35.36      | 37.96         |                    | 29.08             | N/A              | N/A              | 42.11            | 35.36      | 37.96         |                    | 28.73             | 33.72            | 34.38            | 34.91            | 35.82      | 34.13         |                   |
| 9P        | 28.41              | 21.68             | 22.80            | 22.99            | 35.36            | 37.96      |               |                    | 28.99             | N/A              | N/A              | 37.58            | 35.36      | 37.96         |                    | 28.80             | N/A              | N/A              | 37.14            | 35.36      | 37.96         |                    | 30.19             | N/A              | N/A              | 43.22            | 35.36      | 37.96         |                    | 28.09             | 23.05            | 24.41            | 24.19            | 34.22      | 34.24         |                   |
| 10P       | 28.27              | 20.07             | 21.38            | 21.71            | 35.14            | 38.32      |               |                    | 29.83             | N/A              | N/A              | N/A              | 35.14      | 38.32         |                    | 28.76             | N/A              | N/A              | N/A              | 35.14      | 38.32         |                    | 28.11             | 36.28            | 36.04            | 37.87            | 35.14      | 38.32         |                    | 30.80             | 25.15            | 26.27            | 26.49            | 35.14      | 37.18         |                   |
| 11P       | 29.45              | 21.49             | 23.53            | 24.17            | 35.49            | 38.34      |               |                    | 27.67             | 43.23            | N/A              | N/A              | 35.49      | 38.34         |                    | 28.29             | N/A              | N/A              | N/A              | 35.49      | 38.34         |                    | 29.39             | 37.08            | N/A              | N/A              | 35.49      | 38.34         |                    | 30.11             | 24.67            | 26.74            | 27.12            | 35.14      | 37.18         |                   |
| 12P       | 28.25              | 17.45             | 19.10            | 19.55            | 35.36            | 37.96      |               |                    | 32.04             | N/A              | N/A              | N/A              | 35.36      | 37.96         |                    | 27.98             | N/A              | N/A              | 40.87            | 35.36      | 37.96         |                    | 28.57             | N/A              | N/A              | 42.20            | 35.36      | 37.96         |                    | 31.54             | 21.92            | 23.31            | 23.86            | 35.14      | 37.18         |                   |
| 13P       | 28.56              | 20.85             | 21.81            | 21.73            | 34.72            | 37.90      |               |                    | 28.70             | 37.18            | N/A              | N/A              | 34.72      | 37.90         |                    | 27.68             | 37.09            | N/A              | 38.44            | 34.72      | 37.90         |                    | 28.85             | N/A              | N/A              | N/A              | 34.72      | 37.90         |                    | 29.62             | 24.14            | 24.72            | 24.63            | 35.14      | 37.18         |                   |
| 14P       | 29.29              | 17.10             | 19.07            | 19.20            | 34.72            | 37.90      |               |                    | 29.42             | N/A              | N/A              | N/A              | 33.76      | 38.43         |                    | 28.22             | N/A              | N/A              | 41.53            | 33.76      | 38.43         |                    | 26.30             | N/A              | N/A              | N/A              | 33.76      | 38.43         |                    | 28.85             | 19.40            | 20.95            | 21.14            | 35.14      | 37.18         |                   |
| 15P       | 28.49              | 23.06             | 24.23            | 24.17            | 34.72            | 37.90      |               |                    | 27.28             | 38.62            | N/A              | 37.70            | 34.89      | 37.21         |                    | 28.20             | 44.63            | 37.09            | 36.69            | 34.89      | 37.21         |                    | 28.32             | 41.72            | N/A              | 42.70            | 34.89      | 37.21         |                    | 30.08             | 26.01            | 27.06            | 27.09            | 35.14      | 37.18         |                   |
| 16P       | 28.01              | 21.08             | 22.30            | 22.20            | 34.72            | 37.90      |               |                    | 27.91             | 43.50            | N/A              | 44.66            | 34.72      | 37.90         |                    | 27.89             | N/A              | N/A              | 42.15            | 34.72      | 37.90         |                    | 28.25             | 35.86            | 36.22            | 36.62            | 34.72      | 37.90         |                    | 29.42             | 23.36            | 24.73            | 24.56            | 35.14      | 37.18         |                   |
| 17P       | 27.86              | 22.61             | 24.66            | 24.47            | 34.72            | 37.90      |               |                    | 27.56             | N/A              | 42.57            | 41.58            | 34.72      | 37.90         |                    | 28.17             | N/A              | N/A              | 39.26            | 34.72      | 37.90         |                    | 27.19             | N/A              | N/A              | N/A              | 34.72      | 37.90         |                    | 29.61             | 28.27            | 30.14            | 30.08            | 35.14      | 37.18         |                   |
| 18P       | 27.79              | 31.22             | 31.20            | 30.91            | 34.72            | 37.90      |               |                    | 29.22             | N/A              | 36.63            | N/A              | 34.72      | 37.90         |                    | 27.68             | N/A              | N/A              | 43.37            | 34.72      | 37.90         |                    | 28.81             | N/A              | N/A              | N/A              | 34.72      | 37.90         |                    | 28.34             | 32.06            | 32.87            | 32.60            | 34.84      | 37.00         |                   |
| 19P       | 27.81              | 33.73             | 32.82            | 33.39            | 33.76            | 38.43      |               |                    | 28.22             | N/A              | N/A              | 41.10            | 33.76      | 38.43         |                    |                   |                  |                  |                  |            |               |                    |                   |                  |                  |                  |            |               |                    |                   |                  |                  |                  |            |               |                   |

**Positives**

| A         | B                 | C     | D             | E                | F     | G             | H                | I     | J             | K                | L     | M             |
|-----------|-------------------|-------|---------------|------------------|-------|---------------|------------------|-------|---------------|------------------|-------|---------------|
|           | Ct <sub>RPP</sub> |       |               | Ct <sub>N2</sub> |       |               | Ct <sub>E1</sub> |       |               | Ct <sub>S6</sub> |       |               |
| Pool name | Individual        | Pool  | Ct difference | Individual       | Pool  | Ct difference | Individual       | Pool  | Ct difference | Individual       | Pool  | Ct difference |
| 1P        | 27.99             | 27.66 | -0.33         | 25.93            | 28.73 | 2.80          | 28.19            | 30.42 | 2.23          | 28.31            | 30.70 | 2.39          |
| 2P        | 30.23             | 28.87 | -1.36         | 19.81            | 23.25 | 3.43          | 20.86            | 24.25 | 3.39          | 21.52            | 25.45 | 3.93          |
| 3P        | 30.50             | 29.01 | -1.50         | 20.67            | 20.31 | -0.36         | 20.84            | 20.61 | -0.22         | 20.54            | 20.46 | -0.08         |
| 4P        | 27.63             | 27.08 | -0.55         | 32.52            | 33.09 | 0.57          | 33.79            | 34.22 | 0.43          | 34.24            | 34.70 | 0.45          |
| 5P        | 28.43             | 28.82 | 0.39          | 15.32            | 18.01 | 2.69          | 16.49            | 18.74 | 2.25          | 16.58            | 18.38 | 1.79          |
| 6P        | 29.03             | 28.07 | -0.95         | 26.65            | 29.18 | 2.52          | 28.78            | 30.90 | 2.12          | 29.38            | 31.17 | 1.79          |
| 7P        | 29.10             | 29.04 | -0.05         | 21.48            | 23.68 | 2.20          | 23.29            | 25.06 | 1.77          | 23.16            | 24.96 | 1.80          |
| 8P        | 29.60             | 28.73 | -0.88         | 32.91            | 33.72 | 0.81          | 33.68            | 34.38 | 0.70          | 33.48            | 34.91 | 1.43          |
| 9P        | 28.41             | 28.09 | -0.31         | 21.68            | 23.05 | 1.37          | 22.80            | 24.41 | 1.61          | 22.99            | 24.19 | 1.20          |
| 10P       | 28.27             | 30.80 | 2.53          | 20.07            | 25.15 | 5.08          | 21.38            | 26.27 | 4.89          | 21.71            | 26.49 | 4.78          |
| 11P       | 29.45             | 30.11 | 0.66          | 21.49            | 24.67 | 3.17          | 23.53            | 26.74 | 3.21          | 24.17            | 27.12 | 2.95          |
| 12P       | 28.25             | 31.54 | 3.28          | 17.45            | 21.92 | 4.48          | 19.10            | 23.31 | 4.21          | 19.55            | 23.86 | 4.31          |
| 13P       | 28.56             | 29.62 | 1.06          | 20.85            | 24.14 | 3.29          | 21.81            | 24.72 | 2.90          | 21.73            | 24.63 | 2.90          |
| 14P       | 29.29             | 28.85 | -0.44         | 17.10            | 19.40 | 2.31          | 19.07            | 20.95 | 1.88          | 19.20            | 21.14 | 1.95          |
| 15P       | 28.49             | 30.08 | 1.59          | 23.06            | 26.01 | 2.95          | 24.23            | 27.06 | 2.83          | 24.17            | 27.09 | 2.92          |
| 16P       | 28.01             | 29.42 | 1.41          | 21.08            | 23.36 | 2.28          | 22.30            | 24.73 | 2.43          | 22.20            | 24.56 | 2.35          |
| 17P       | 27.86             | 29.61 | 1.75          | 22.61            | 28.27 | 5.66          | 24.66            | 30.14 | 5.48          | 24.47            | 30.08 | 5.61          |
| 18P       | 27.79             | 28.34 | 0.54          | 31.22            | 32.06 | 0.84          | 31.20            | 32.87 | 1.67          | 30.91            | 32.60 | 1.70          |
| 19P       | 27.81             | 28.20 | 0.39          | 33.73            | 35.50 | 1.78          | 32.82            | 35.10 | 2.28          | 33.39            | 36.11 | 2.72          |
| 20P       | 28.46             | 28.60 | 0.13          | 21.16            | 22.62 | 1.46          | 22.26            | 24.04 | 1.78          | 22.16            | 24.09 | 1.93          |
| 21P       | 27.06             | 28.06 | 1.00          | 33.26            | 35.91 | 2.65          | 33.12            | 35.93 | 2.81          | 32.61            | 34.74 | 2.13          |

Regression

| Pool name | Ct <sub>N</sub> |       | Ct <sub>E</sub> |       | Ct <sub>S</sub> |       |
|-----------|-----------------|-------|-----------------|-------|-----------------|-------|
|           | Individual      | Pool  | Individual      | Pool  | Individual      | Pool  |
| 1P        | 25.93           | 28.73 | 28.19           | 30.42 | 28.31           | 30.70 |
| 2P        | 19.81           | 23.25 | 20.86           | 24.25 | 21.52           | 25.45 |
| 3P        | 20.67           | 20.31 | 20.84           | 20.61 | 20.54           | 20.46 |
| 4P        | 32.52           | 33.09 | 33.79           | 34.22 | 34.24           | 34.70 |
| 5P        | 15.32           | 18.01 | 16.49           | 18.74 | 16.58           | 18.38 |
| 6P        | 26.65           | 29.18 | 28.78           | 30.90 | 29.38           | 31.17 |
| 7P        | 21.48           | 23.68 | 23.29           | 25.06 | 23.16           | 24.96 |
| 8P        | 32.91           | 33.72 | 33.68           | 34.38 | 33.48           | 34.91 |
| 9P        | 21.68           | 23.05 | 22.80           | 24.41 | 22.99           | 24.19 |
| 10P       | 20.07           | 25.15 | 21.38           | 26.27 | 21.71           | 26.49 |
| 11P       | 21.49           | 24.67 | 23.53           | 26.74 | 24.17           | 27.12 |
| 12P       | 17.45           | 21.92 | 19.10           | 23.31 | 19.55           | 23.86 |
| 13P       | 20.85           | 24.14 | 21.81           | 24.72 | 21.73           | 24.63 |
| 14P       | 17.10           | 19.40 | 19.07           | 20.95 | 19.20           | 21.14 |
| 15P       | 23.06           | 26.01 | 24.23           | 27.06 | 24.17           | 27.09 |
| 16P       | 21.08           | 23.36 | 22.30           | 24.73 | 22.20           | 24.56 |
| 17P       | 22.61           | 28.27 | 24.66           | 30.14 | 24.47           | 30.08 |
| 18P       | 31.22           | 32.06 | 31.20           | 32.87 | 30.91           | 32.60 |
| 19P       | 33.73           | 35.50 | 32.82           | 35.10 | 33.39           | 36.11 |
| 20P       | 21.16           | 22.62 | 22.26           | 24.04 | 22.16           | 24.09 |
| 21P       | 33.26           | 35.91 | 33.12           | 35.93 | 32.61           | 34.74 |

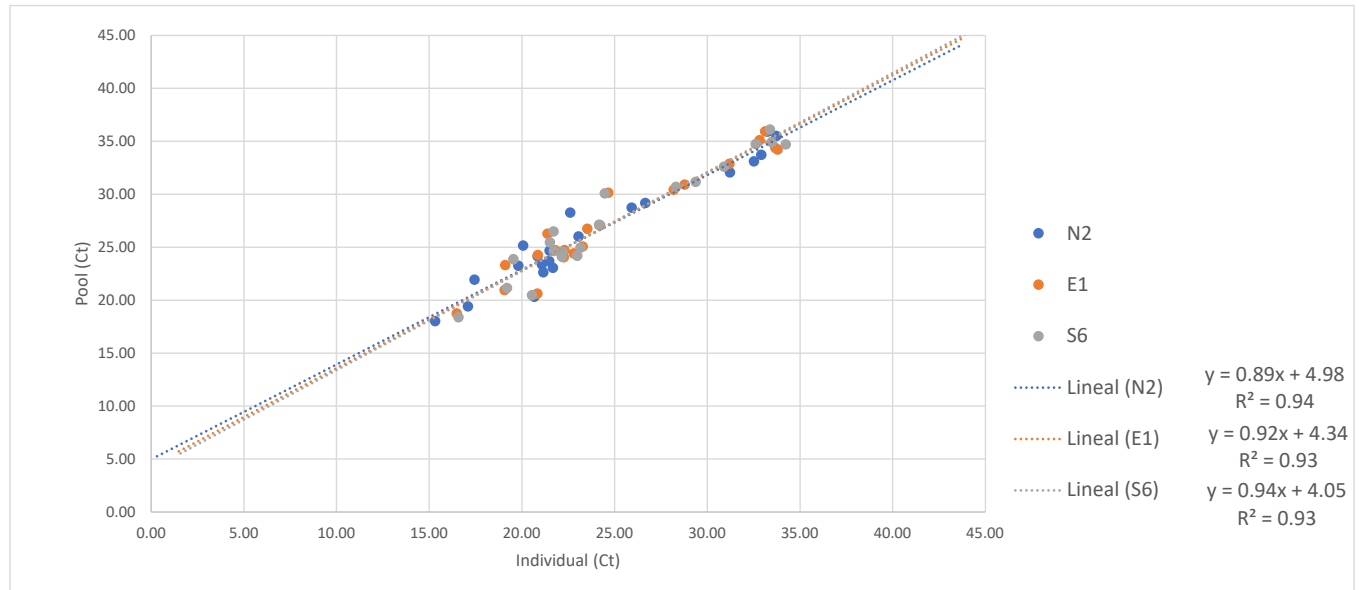

| Gene | Pool  |              |              | Individual |              |              |
|------|-------|--------------|--------------|------------|--------------|--------------|
|      | LOD   | 95% CI lower | 95% CI upper | LOD        | 95% CI lower | 95% CI upper |
| N    | 37.29 | 36.91        | 37.67        | 36.30      | 35.88        | 36.73        |
| E    | 37.29 | 36.91        | 37.67        | 35.82      | 35.40        | 36.23        |
| S    | 37.29 | 36.91        | 37.67        | 35.36      | 34.96        | 35.77        |

For a pool which is at the limit of detection, the individual sample would have had a Ct around 36.30 for N2. This means that during the pooling procedure samples with Cts between 36.30 and 37.29 would have been detected using individual testing but will not be due to pooling.
