# Supplementary material for: Development and Implementation of a scalable and versatile test for COVID-19 diagnostics in rural communities
Source: bioRxiv or medRxiv preprint supplement (doi:10.1101/2021.03.01.21252679), 2021-03-08
Supplement: Supplementary file [file media-13.pdf]

|     |          |       |       |       |       |       |       |       |       |          |          |          |          |          |          |
|-----|----------|-------|-------|-------|-------|-------|-------|-------|-------|----------|----------|----------|----------|----------|----------|
| 53  | V0011438 | 28.28 | 19.32 | 21.47 | 22.33 | 36.94 | 36.95 | 34.94 | 35.92 | Positive | Positive | Positive | Positive | Positive | Positive |
| 54  | V0012919 | 27.95 | 22.28 | 22.81 | 22.95 | 36.94 | 36.95 | 34.94 | 35.92 | Positive | Positive | Positive | Positive | Positive | Positive |
| 55  | V0014055 | 29.30 | 27.99 | 28.54 | 28.45 | 36.94 | 36.95 | 34.94 | 35.92 | Positive | Positive | Positive | Positive | Positive | Positive |
| 56  | V0014061 | 28.23 | 26.56 | 27.50 | 27.86 | 36.94 | 36.95 | 34.94 | 35.92 | Positive | Positive | Positive | Positive | Positive | Positive |
| 57  | V0012907 | 29.70 | 15.19 | 16.42 | 17.14 | 34.83 | 36.30 | 32.83 | 33.55 | Positive | Positive | Positive | Positive | Positive | Positive |
| 58  | V0003662 | 29.15 | 33.54 | 34.72 | 35.70 | 34.83 | 36.30 | 32.83 | 33.55 | Negative | Negative | Negative | Positive | Negative | Negative |
| 59  | V0012806 | 29.20 | 27.11 | 26.94 | 26.93 | 37.03 | 35.40 | 35.03 | 36.02 | Positive | Positive | Positive | Positive | Positive | Positive |
| 60  | V0012116 | 29.97 | 35.21 | 36.56 | 36.21 | 37.03 | 35.40 | 35.03 | 36.02 | Negative | Negative | Negative | Positive | Negative | Negative |
| 61  | V0012153 | 29.33 | 34.55 | 37.44 | 35.54 | 37.03 | 35.40 | 35.03 | 36.02 | Positive | Negative | Negative | Positive | Negative | Positive |
| 62  | V0012513 | 32.64 | 35.03 | 35.09 | 36.12 | 36.60 | 36.96 | 34.60 | 35.54 | Negative | Negative | Negative | Positive | Positive | Negative |
| 63  | V0014030 | 29.40 | 36.55 | 36.39 | 36.83 | 36.60 | 36.96 | 34.60 | 35.54 | Negative | Negative | Negative | Negative | Negative | Negative |
| 64  | V0011709 | 28.99 | 34.29 | 34.75 | 36.70 | 36.60 | 36.96 | 34.60 | 35.54 | Positive | Negative | Negative | Positive | Positive | Negative |
| 65  | V0012038 | 27.46 | 27.07 | 27.58 | 27.68 | 36.46 | 35.56 | 34.46 | 35.39 | Positive | Positive | Positive | Positive | Positive | Positive |
| 66  | V0012076 | 30.36 | 20.23 | 21.60 | 21.85 | 36.46 | 35.56 | 34.46 | 35.39 | Positive | Positive | Positive | Positive | Positive | Positive |
| 67  | V0013487 | 30.13 | 34.67 | 34.95 | 35.82 | 36.46 | 35.56 | 34.46 | 35.39 | Negative | Negative | Negative | Positive | Positive | Negative |
| 68  | V0012539 | 32.13 | 36.04 | 36.52 | 36.30 | 36.37 | 36.90 | 34.37 | 35.28 | Negative | Negative | Negative | Negative | Negative | Negative |
| 69  | V0013218 | 29.54 | 20.20 | 20.24 | 20.29 | 36.37 | 36.90 | 34.37 | 35.28 | Positive | Positive | Positive | Positive | Positive | Positive |
| 70  | V0013385 | 28.72 | 27.71 | 27.52 | 27.85 | 36.37 | 36.90 | 34.37 | 35.28 | Positive | Positive | Positive | Positive | Positive | Positive |
| 71  | V0013210 | 28.33 | 29.53 | 29.88 | 29.79 | 36.09 | 35.41 | 34.09 | 34.97 | Positive | Positive | Positive | Positive | Positive | Positive |
| 72  | V0012016 | 28.18 | 25.03 | 23.84 | 23.99 | 36.04 | 36.13 | 34.04 | 34.91 | Positive | Positive | Positive | Positive | Positive | Positive |
| 73  | V0012096 | 27.94 | 29.64 | 30.30 | 30.29 | 36.04 | 36.13 | 34.04 | 34.91 | Positive | Positive | Positive | Positive | Positive | Positive |
| 74  | V0012100 | 28.21 | 25.32 | 25.51 | 25.89 | 36.04 | 36.13 | 34.04 | 34.91 | Positive | Positive | Positive | Positive | Positive | Positive |
| 75  | V0012315 | 30.14 | 36.14 | 34.94 | 35.90 | 35.98 | 35.56 | 33.98 | 34.84 | Negative | Negative | Negative | Negative | Negative | Negative |
| 76  | V0010757 | 28.60 | 16.49 | 17.23 | 17.09 | 36.11 | 36.43 | 34.11 | 34.99 | Positive | Positive | Positive | Positive | Positive | Positive |
| 77  | V0010968 | 28.45 | 34.05 | 35.83 | 35.88 | 36.24 | 36.28 | 34.24 | 35.14 | Positive | Negative | Negative | Positive | Negative | Negative |
| 78  | V0012065 | 29.89 | 35.11 | 34.55 | 36.57 | 36.24 | 36.28 | 34.24 | 35.14 | Negative | Negative | Negative | Positive | Positive | Negative |
| 79  | V0012208 | 28.20 | 32.33 | 32.87 | 33.42 | 36.24 | 36.28 | 34.24 | 35.14 | Positive | Positive | Positive | Positive | Positive | Positive |
| 80  | V0012303 | 30.40 | 18.75 | 20.23 | 20.66 | 34.72 | 36.43 | 32.72 | 33.43 | Positive | Positive | Positive | Positive | Positive | Positive |
| 81  | V0012307 | 31.77 | 21.62 | 23.33 | 24.10 | 34.72 | 36.43 | 32.72 | 33.43 | Positive | Positive | Positive | Positive | Positive | Positive |
| 82  | V0011361 | 30.28 | 34.42 | 36.63 | 35.55 | 35.76 | 35.17 | 33.76 | 34.59 | Negative | Negative | Negative | Positive | Negative | Negative |
| 83  | V0012002 | 29.06 | 17.45 | 17.82 | 18.21 | 35.70 | 35.19 | 33.70 | 34.53 | Positive | Positive | Positive | Positive | Positive | Positive |
| 84  | V0012305 | 29.46 | 23.81 | 25.37 | 26.50 | 35.70 | 35.19 | 33.70 | 34.53 | Positive | Positive | Positive | Positive | Positive | Positive |
| 85  | V0012311 | 25.18 | 36.73 | 34.84 | 34.49 | 35.70 | 35.19 | 33.70 | 34.53 | Negative | Negative | Negative | Negative | Negative | Positive |
| 86  | V0009459 | 28.97 | 35.91 | 35.35 | 35.86 | 35.89 | 35.44 | 33.89 | 34.75 | Negative | Negative | Negative | Negative | Negative | Negative |
| 87  | V0010733 | 29.56 | 16.35 | 18.29 | 18.17 | 36.45 | 34.90 | 34.45 | 35.37 | Positive | Positive | Positive | Positive | Positive | Positive |
| 88  | V0010756 | 29.71 | 34.39 | 37.02 | 36.20 | 36.45 | 34.90 | 34.45 | 35.37 | Positive | Negative | Negative | Positive | Negative | Negative |
| 89  | V0011595 | 28.00 | 21.16 | 23.21 | 23.50 | 36.70 | 34.78 | 34.70 | 35.65 | Positive | Positive | Positive | Positive | Positive | Positive |
| 90  | V0011727 | 28.48 | 27.96 | 29.20 | 29.03 | 36.70 | 34.78 | 34.70 | 35.65 | Positive | Positive | Positive | Positive | Positive | Positive |
| 91  | V0011736 | 28.71 | 34.72 | 34.87 | 35.54 | 36.70 | 34.78 | 34.70 | 35.65 | Negative | Negative | Negative | Positive | Positive | Positive |
| 92  | V0011057 | 27.14 | 34.89 | 35.73 | 35.67 | 36.12 | 36.22 | 34.12 | 35.00 | Negative | Negative | Negative | Positive | Negative | Negative |
| 93  | V0011710 | 28.08 | 35.74 | 34.20 | 36.01 | 36.12 | 36.22 | 34.12 | 35.00 | Negative | Negative | Negative | Negative | Positive | Negative |
| 94  | V0010958 | 27.83 | 37.29 | 37.23 | 45.00 | 37.33 | 36.09 | 35.33 | 36.36 | Negative | Negative | Negative | Negative | Negative | Negative |
| 95  | V0011446 | 27.37 | 23.50 | 25.28 | 25.97 | 37.33 | 36.09 | 35.33 | 36.36 | Positive | Positive | Positive | Positive | Positive | Positive |
| 96  | V0009529 | 28.67 | 33.80 | 36.04 | 36.63 | 37.33 | 36.09 | 35.33 | 36.36 | Positive | Negative | Negative | Positive | Positive | Negative |
| 97  | V0009535 | 29.38 | 15.97 | 17.74 | 18.86 | 37.33 | 36.09 | 35.33 | 36.36 | Positive | Positive | Positive | Positive | Positive | Positive |
| 98  | V0009548 | 28.25 | 36.10 | 37.26 | 37.60 | 37.33 | 36.09 | 35.33 | 36.36 | Negative | Negative | Negative | Positive | Negative | Negative |
| 99  | V0012405 | 28.69 | 33.34 | 32.72 | 33.96 | 36.87 | 35.30 | 34.87 | 35.84 | Positive | Positive | Positive | Positive | Positive | Positive |
| 100 | V0010641 | 26.97 | 33.80 | 34.16 | 33.61 | 35.84 | 35.60 | 33.84 | 34.68 | Positive | Negative | Positive | Positive | Positive | Positive |



|     |          |       |       |       |       |       |       |       |       |          |          |          |          |          |          |
|-----|----------|-------|-------|-------|-------|-------|-------|-------|-------|----------|----------|----------|----------|----------|----------|
| 53  | V0011438 | 28.28 | 19.32 | 21.47 | 22.33 | 36.94 | 36.95 | 35.35 | 35.81 | Positive | Positive | Positive | Positive | Positive | Positive |
| 54  | V0012919 | 27.95 | 22.28 | 22.81 | 22.95 | 36.94 | 36.95 | 35.35 | 35.81 | Positive | Positive | Positive | Positive | Positive | Positive |
| 55  | V0014055 | 29.30 | 27.99 | 28.54 | 28.45 | 36.94 | 36.95 | 35.35 | 35.81 | Positive | Positive | Positive | Positive | Positive | Positive |
| 56  | V0014061 | 28.23 | 26.56 | 27.50 | 27.86 | 36.94 | 36.95 | 35.35 | 35.81 | Positive | Positive | Positive | Positive | Positive | Positive |
| 57  | V0012907 | 29.70 | 15.19 | 16.42 | 17.14 | 34.83 | 36.30 | 33.24 | 33.69 | Positive | Positive | Positive | Positive | Positive | Positive |
| 58  | V0003662 | 29.15 | 33.54 | 34.72 | 35.70 | 34.83 | 36.30 | 33.24 | 33.69 | Negative | Negative | Negative | Positive | Negative | Negative |
| 59  | V0012806 | 29.20 | 27.11 | 26.94 | 26.93 | 37.03 | 35.40 | 35.44 | 35.90 | Positive | Positive | Positive | Positive | Positive | Positive |
| 60  | V0012116 | 29.97 | 35.21 | 36.56 | 36.21 | 37.03 | 35.40 | 35.44 | 35.90 | Positive | Negative | Negative | Positive | Negative | Negative |
| 61  | V0012153 | 29.33 | 34.55 | 37.44 | 35.54 | 37.03 | 35.40 | 35.44 | 35.90 | Positive | Negative | Negative | Positive | Negative | Positive |
| 62  | V0012513 | 32.64 | 35.03 | 35.09 | 36.12 | 36.60 | 36.96 | 35.02 | 35.48 | Negative | Negative | Negative | Positive | Positive | Negative |
| 63  | V0014030 | 29.40 | 36.55 | 36.39 | 36.83 | 36.60 | 36.96 | 35.02 | 35.48 | Negative | Negative | Negative | Negative | Negative | Negative |
| 64  | V0011709 | 28.99 | 34.29 | 34.75 | 36.70 | 36.60 | 36.96 | 35.02 | 35.48 | Positive | Positive | Negative | Positive | Positive | Negative |
| 65  | V0012038 | 27.46 | 27.07 | 27.58 | 27.68 | 36.46 | 35.56 | 34.88 | 35.34 | Positive | Positive | Positive | Positive | Positive | Positive |
| 66  | V0012076 | 30.36 | 20.23 | 21.60 | 21.85 | 36.46 | 35.56 | 34.88 | 35.34 | Positive | Positive | Positive | Positive | Positive | Positive |
| 67  | V0013487 | 30.13 | 34.67 | 34.95 | 35.82 | 36.46 | 35.56 | 34.88 | 35.34 | Positive | Negative | Negative | Positive | Positive | Negative |
| 68  | V0012539 | 32.13 | 36.04 | 36.52 | 36.30 | 36.37 | 36.90 | 34.78 | 35.24 | Negative | Negative | Negative | Negative | Negative | Negative |
| 69  | V0013218 | 29.54 | 20.20 | 20.24 | 20.29 | 36.37 | 36.90 | 34.78 | 35.24 | Positive | Positive | Positive | Positive | Positive | Positive |
| 70  | V0013385 | 28.72 | 27.71 | 27.52 | 27.85 | 36.37 | 36.90 | 34.78 | 35.24 | Positive | Positive | Positive | Positive | Positive | Positive |
| 71  | V0013210 | 28.33 | 29.53 | 29.88 | 29.79 | 36.09 | 35.41 | 34.51 | 34.96 | Positive | Positive | Positive | Positive | Positive | Positive |
| 72  | V0012016 | 28.18 | 25.03 | 23.84 | 23.99 | 36.04 | 36.13 | 34.46 | 34.91 | Positive | Positive | Positive | Positive | Positive | Positive |
| 73  | V0012096 | 27.94 | 29.64 | 30.30 | 30.29 | 36.04 | 36.13 | 34.46 | 34.91 | Positive | Positive | Positive | Positive | Positive | Positive |
| 74  | V0012100 | 28.21 | 25.32 | 25.51 | 25.89 | 36.04 | 36.13 | 34.46 | 34.91 | Positive | Positive | Positive | Positive | Positive | Positive |
| 75  | V0012315 | 30.14 | 36.14 | 34.94 | 35.90 | 35.98 | 35.56 | 34.39 | 34.84 | Negative | Negative | Negative | Negative | Negative | Negative |
| 76  | V0010757 | 28.60 | 16.49 | 17.23 | 17.09 | 36.11 | 36.43 | 34.52 | 34.98 | Positive | Positive | Positive | Positive | Positive | Positive |
| 77  | V0010968 | 28.45 | 34.05 | 35.83 | 35.88 | 36.24 | 36.28 | 34.66 | 35.11 | Positive | Negative | Negative | Positive | Negative | Negative |
| 78  | V0012065 | 29.89 | 35.11 | 34.55 | 36.57 | 36.24 | 36.28 | 34.66 | 35.11 | Negative | Positive | Negative | Positive | Positive | Negative |
| 79  | V0012208 | 28.20 | 32.33 | 32.87 | 33.42 | 36.24 | 36.28 | 34.66 | 35.11 | Positive | Positive | Positive | Positive | Positive | Positive |
| 80  | V0012303 | 30.40 | 18.75 | 20.23 | 20.66 | 34.72 | 36.43 | 33.14 | 33.58 | Positive | Positive | Positive | Positive | Positive | Positive |
| 81  | V0012307 | 31.77 | 21.62 | 23.33 | 24.10 | 34.72 | 36.43 | 33.14 | 33.58 | Positive | Positive | Positive | Positive | Positive | Positive |
| 82  | V0011361 | 30.28 | 34.42 | 36.63 | 35.55 | 35.76 | 35.17 | 34.17 | 34.63 | Negative | Negative | Negative | Positive | Negative | Negative |
| 83  | V0012002 | 29.06 | 17.45 | 17.82 | 18.21 | 35.70 | 35.19 | 34.11 | 34.56 | Positive | Positive | Positive | Positive | Positive | Positive |
| 84  | V0012305 | 29.46 | 23.81 | 25.37 | 26.50 | 35.70 | 35.19 | 34.11 | 34.56 | Positive | Positive | Positive | Positive | Positive | Positive |
| 85  | V0012311 | 25.18 | 36.73 | 34.84 | 34.49 | 35.70 | 35.19 | 34.11 | 34.56 | Negative | Negative | Negative | Negative | Negative | Positive |
| 86  | V0009459 | 28.97 | 35.91 | 35.35 | 35.86 | 35.89 | 35.44 | 34.31 | 34.76 | Negative | Negative | Negative | Negative | Negative | Negative |
| 87  | V0010733 | 29.56 | 16.35 | 18.29 | 18.17 | 36.45 | 34.90 | 34.86 | 35.32 | Positive | Positive | Positive | Positive | Positive | Positive |
| 88  | V0010756 | 29.71 | 34.39 | 37.02 | 36.20 | 36.45 | 34.90 | 34.86 | 35.32 | Positive | Negative | Negative | Positive | Negative | Negative |
| 89  | V0011595 | 28.00 | 21.16 | 23.21 | 23.50 | 36.70 | 34.78 | 35.11 | 35.57 | Positive | Positive | Positive | Positive | Positive | Positive |
| 90  | V0011727 | 28.48 | 27.96 | 29.20 | 29.03 | 36.70 | 34.78 | 35.11 | 35.57 | Positive | Positive | Positive | Positive | Positive | Positive |
| 91  | V0011736 | 28.71 | 34.72 | 34.87 | 35.54 | 36.70 | 34.78 | 35.11 | 35.57 | Positive | Positive | Negative | Positive | Positive | Positive |
| 92  | V0011057 | 27.14 | 34.89 | 35.73 | 35.67 | 36.12 | 36.22 | 34.53 | 34.99 | Negative | Negative | Negative | Positive | Negative | Negative |
| 93  | V0011710 | 28.08 | 35.74 | 34.20 | 36.01 | 36.12 | 36.22 | 34.53 | 34.99 | Negative | Positive | Negative | Negative | Positive | Negative |
| 94  | V0010958 | 27.83 | 37.29 | 37.23 | 45.00 | 37.33 | 36.09 | 35.75 | 36.21 | Negative | Negative | Negative | Negative | Negative | Negative |
| 95  | V0011446 | 27.37 | 23.50 | 25.28 | 25.97 | 37.33 | 36.09 | 35.75 | 36.21 | Positive | Positive | Positive | Positive | Positive | Positive |
| 96  | V0009529 | 28.67 | 33.80 | 36.04 | 36.63 | 37.33 | 36.09 | 35.75 | 36.21 | Positive | Negative | Negative | Positive | Positive | Negative |
| 97  | V0009535 | 29.38 | 15.97 | 17.74 | 18.86 | 37.33 | 36.09 | 35.75 | 36.21 | Positive | Positive | Positive | Positive | Positive | Positive |
| 98  | V0009548 | 28.25 | 36.10 | 37.26 | 37.60 | 37.33 | 36.09 | 35.75 | 36.21 | Negative | Negative | Negative | Positive | Negative | Negative |
| 99  | V0012405 | 28.69 | 33.34 | 32.72 | 33.96 | 36.87 | 35.30 | 35.28 | 35.75 | Positive | Positive | Positive | Positive | Positive | Positive |
| 100 | V0010641 | 26.97 | 33.80 | 34.16 | 33.61 | 35.84 | 35.60 | 34.25 | 34.71 | Positive | Positive | Positive | Positive | Positive | Positive |



|     |          |       |       |       |       |       |       |       |       |          |          |          |          |          |          |
|-----|----------|-------|-------|-------|-------|-------|-------|-------|-------|----------|----------|----------|----------|----------|----------|
| 51  | V0011423 | 27.97 | 26.64 | 28.07 | 28.40 | 36.53 | 35.77 | 35.53 | 37.70 | Positive | Positive | Positive | Positive | Positive | Positive |
| 52  | V0014057 | 28.89 | 21.48 | 22.35 | 22.57 | 36.53 | 35.77 | 35.53 | 37.70 | Positive | Positive | Positive | Positive | Positive | Positive |
| 53  | V0011438 | 28.28 | 19.32 | 21.47 | 22.33 | 36.94 | 36.95 | 35.94 | 38.15 | Positive | Positive | Positive | Positive | Positive | Positive |
| 54  | V0012919 | 27.95 | 22.28 | 22.81 | 22.95 | 36.94 | 36.95 | 35.94 | 38.15 | Positive | Positive | Positive | Positive | Positive | Positive |
| 55  | V0014055 | 29.30 | 27.99 | 28.54 | 28.45 | 36.94 | 36.95 | 35.94 | 38.15 | Positive | Positive | Positive | Positive | Positive | Positive |
| 56  | V0014061 | 28.23 | 26.56 | 27.50 | 27.86 | 36.94 | 36.95 | 35.94 | 38.15 | Positive | Positive | Positive | Positive | Positive | Positive |
| 57  | V0012907 | 29.70 | 15.19 | 16.42 | 17.14 | 34.83 | 36.30 | 33.83 | 35.81 | Positive | Positive | Positive | Positive | Positive | Positive |
| 58  | V0003662 | 29.15 | 33.54 | 34.72 | 35.70 | 34.83 | 36.30 | 33.83 | 35.81 | Positive | Negative | Negative | Positive | Positive | Positive |
| 59  | V0012806 | 29.20 | 27.11 | 26.94 | 26.93 | 37.03 | 35.40 | 36.03 | 38.25 | Positive | Positive | Positive | Positive | Positive | Positive |
| 60  | V0012116 | 29.97 | 35.21 | 36.56 | 36.21 | 37.03 | 35.40 | 36.03 | 38.25 | Positive | Negative | Negative | Positive | Positive | Positive |
| 61  | V0012153 | 29.33 | 34.55 | 37.44 | 35.54 | 37.03 | 35.40 | 36.03 | 38.25 | Positive | Negative | Positive | Positive | Positive | Positive |
| 62  | V0012513 | 32.64 | 35.03 | 35.09 | 36.12 | 36.60 | 36.96 | 35.60 | 37.78 | Positive | Positive | Negative | Positive | Positive | Positive |
| 63  | V0014030 | 29.40 | 36.55 | 36.39 | 36.83 | 36.60 | 36.96 | 35.60 | 37.78 | Negative | Negative | Negative | Positive | Positive | Positive |
| 64  | V0011709 | 28.99 | 34.29 | 34.75 | 36.70 | 36.60 | 36.96 | 35.60 | 37.78 | Positive | Positive | Negative | Positive | Positive | Positive |
| 65  | V0012038 | 27.46 | 27.07 | 27.58 | 27.68 | 36.46 | 35.56 | 35.46 | 37.63 | Positive | Positive | Positive | Positive | Positive | Positive |
| 66  | V0012076 | 30.36 | 20.23 | 21.60 | 21.85 | 36.46 | 35.56 | 35.46 | 37.63 | Positive | Positive | Positive | Positive | Positive | Positive |
| 67  | V0013487 | 30.13 | 34.67 | 34.95 | 35.82 | 36.46 | 35.56 | 35.46 | 37.63 | Positive | Positive | Negative | Positive | Positive | Positive |
| 68  | V0012539 | 32.13 | 36.04 | 36.52 | 36.30 | 36.37 | 36.90 | 35.37 | 37.52 | Negative | Negative | Negative | Positive | Positive | Positive |
| 69  | V0013218 | 29.54 | 20.20 | 20.24 | 20.29 | 36.37 | 36.90 | 35.37 | 37.52 | Positive | Positive | Positive | Positive | Positive | Positive |
| 70  | V0013385 | 28.72 | 27.71 | 27.52 | 27.85 | 36.37 | 36.90 | 35.37 | 37.52 | Positive | Positive | Positive | Positive | Positive | Positive |
| 71  | V0013210 | 28.33 | 29.53 | 29.88 | 29.79 | 36.09 | 35.41 | 35.09 | 37.21 | Positive | Positive | Positive | Positive | Positive | Positive |
| 72  | V0012016 | 28.18 | 25.03 | 23.84 | 23.99 | 36.04 | 36.13 | 35.04 | 37.16 | Positive | Positive | Positive | Positive | Positive | Positive |
| 73  | V0012096 | 27.94 | 29.64 | 30.30 | 30.29 | 36.04 | 36.13 | 35.04 | 37.16 | Positive | Positive | Positive | Positive | Positive | Positive |
| 74  | V0012100 | 28.21 | 25.32 | 25.51 | 25.89 | 36.04 | 36.13 | 35.04 | 37.16 | Positive | Positive | Positive | Positive | Positive | Positive |
| 75  | V0012315 | 30.14 | 36.14 | 34.94 | 35.90 | 35.98 | 35.56 | 34.98 | 37.08 | Negative | Positive | Negative | Positive | Positive | Positive |
| 76  | V0010757 | 28.60 | 16.49 | 17.23 | 17.09 | 36.11 | 36.43 | 35.11 | 37.23 | Positive | Positive | Positive | Positive | Positive | Positive |
| 77  | V0010968 | 28.45 | 34.05 | 35.83 | 35.88 | 36.24 | 36.28 | 35.24 | 37.38 | Positive | Negative | Negative | Positive | Positive | Positive |
| 78  | V0012065 | 29.89 | 35.11 | 34.55 | 36.57 | 36.24 | 36.28 | 35.24 | 37.38 | Positive | Positive | Negative | Positive | Positive | Positive |
| 79  | V0012208 | 28.20 | 32.33 | 32.87 | 33.42 | 36.24 | 36.28 | 35.24 | 37.38 | Positive | Positive | Positive | Positive | Positive | Positive |
| 80  | V0012303 | 30.40 | 18.75 | 20.23 | 20.66 | 34.72 | 36.43 | 33.72 | 35.69 | Positive | Positive | Positive | Positive | Positive | Positive |
| 81  | V0012307 | 31.77 | 21.62 | 23.33 | 24.10 | 34.72 | 36.43 | 33.72 | 35.69 | Positive | Positive | Positive | Positive | Positive | Positive |
| 82  | V0011361 | 30.28 | 34.42 | 36.63 | 35.55 | 35.76 | 35.17 | 34.76 | 36.84 | Positive | Negative | Negative | Positive | Positive | Positive |
| 83  | V0012002 | 29.06 | 17.45 | 17.82 | 18.21 | 35.70 | 35.19 | 34.70 | 36.78 | Positive | Positive | Positive | Positive | Positive | Positive |
| 84  | V0012305 | 29.46 | 23.81 | 25.37 | 26.50 | 35.70 | 35.19 | 34.70 | 36.78 | Positive | Positive | Positive | Positive | Positive | Positive |
| 85  | V0012311 | 25.18 | 36.73 | 34.84 | 34.49 | 35.70 | 35.19 | 34.70 | 36.78 | Negative | Negative | Positive | Positive | Positive | Positive |
| 86  | V0009459 | 28.97 | 35.91 | 35.35 | 35.86 | 35.89 | 35.44 | 34.89 | 36.99 | Negative | Negative | Negative | Positive | Positive | Positive |
| 87  | V0010733 | 29.56 | 16.35 | 18.29 | 18.17 | 36.45 | 34.90 | 35.45 | 37.61 | Positive | Positive | Positive | Positive | Positive | Positive |
| 88  | V0010756 | 29.71 | 34.39 | 37.02 | 36.20 | 36.45 | 34.90 | 35.45 | 37.61 | Positive | Negative | Negative | Positive | Positive | Positive |
| 89  | V0011595 | 28.00 | 21.16 | 23.21 | 23.50 | 36.70 | 34.78 | 35.70 | 37.89 | Positive | Positive | Positive | Positive | Positive | Positive |
| 90  | V0011727 | 28.48 | 27.96 | 29.20 | 29.03 | 36.70 | 34.78 | 35.70 | 37.89 | Positive | Positive | Positive | Positive | Positive | Positive |
| 91  | V0011736 | 28.71 | 34.72 | 34.87 | 35.54 | 36.70 | 34.78 | 35.70 | 37.89 | Positive | Positive | Positive | Positive | Positive | Positive |
| 92  | V0011057 | 27.14 | 34.89 | 35.73 | 35.67 | 36.12 | 36.22 | 35.12 | 37.24 | Positive | Negative | Negative | Positive | Positive | Positive |
| 93  | V0011710 | 28.08 | 35.74 | 34.20 | 36.01 | 36.12 | 36.22 | 35.12 | 37.24 | Negative | Positive | Negative | Positive | Positive | Positive |
| 94  | V0010958 | 27.83 | 37.29 | 37.23 | 45.00 | 37.33 | 36.09 | 36.33 | 38.59 | Negative | Negative | Negative | Positive | Positive | Negative |
| 95  | V0011446 | 27.37 | 23.50 | 25.28 | 25.97 | 37.33 | 36.09 | 36.33 | 38.59 | Positive | Positive | Positive | Positive | Positive | Positive |
| 96  | V0009529 | 28.67 | 33.80 | 36.04 | 36.63 | 37.33 | 36.09 | 36.33 | 38.59 | Positive | Positive | Negative | Positive | Positive | Positive |
| 97  | V0009535 | 29.38 | 15.97 | 17.74 | 18.86 | 37.33 | 36.09 | 36.33 | 38.59 | Positive | Positive | Positive | Positive | Positive | Positive |
| 98  | V0009548 | 28.25 | 36.10 | 37.26 | 37.60 | 37.33 | 36.09 | 36.33 | 38.59 | Positive | Negative | Negative | Positive | Positive | Positive |
| 99  | V0012405 | 28.69 | 33.34 | 32.72 | 33.96 | 36.87 | 35.30 | 35.87 | 38.08 | Positive | Positive | Positive | Positive | Positive | Positive |
| 100 | V0010641 | 26.97 | 33.80 | 34.16 | 33.61 | 35.84 | 35.60 | 34.84 | 36.93 | Positive | Positive | Positive | Positive | Positive | Positive |
