# Supplementary material for: Development and Implementation of a scalable and versatile test for COVID-19 diagnostics in rural communities
Source: bioRxiv or medRxiv preprint supplement (doi:10.1101/2021.03.01.21252679), 2021-03-08
Supplement: Supplementary file [file media-14.pdf]

Saliva samples

| A              | B          | C                  | D                 | E                    | F                  | G                  | H                  | I             | J           | K           | L            | M                    | N                   | O                    | P                  | Q                  | R                  | S             | T           | U             | V                     | W             |
|----------------|------------|--------------------|-------------------|----------------------|--------------------|--------------------|--------------------|---------------|-------------|-------------|--------------|----------------------|---------------------|----------------------|--------------------|--------------------|--------------------|---------------|-------------|---------------|-----------------------|---------------|
| Patient number | Swab VT ID | Swab date received | Swab plate number | Sw Ct <sub>RPP</sub> | Sw Ct <sub>N</sub> | Sw Ct <sub>E</sub> | Sw Ct <sub>S</sub> | Sw-RPP cutoff | Sw-N cutoff | Swab result | Saliva VT ID | Saliva date received | Saliva plate number | SI Ct <sub>RPP</sub> | SI Ct <sub>N</sub> | SI Ct <sub>E</sub> | SI Ct <sub>S</sub> | SI-RPP cutoff | SI-N cutoff | Saliva result | Swab and Saliva match | Final call    |
|                | V0008867   |                    |                   | 29.62                | N/A                | N/A                | N/A                | 36.94         | 35.36       | Negative    | V0012691     |                      |                     | 29.93                | N/A                | N/A                | 44.43              | 36.94         | 35.36       | Negative      | true                  | True negative |
|                | V0009268   |                    |                   | 28.60                | 41.33              | N/A                | 41.85              | 36.94         | 35.36       | Negative    | V0012713     |                      |                     | 35.69                | N/A                | N/A                | N/A                | 36.94         | 35.36       | Negative      | true                  | True negative |
|                | V0009379   |                    |                   | 30.53                | N/A                | N/A                | N/A                | 36.94         | 35.36       | Negative    | V0012726     |                      |                     | 34.98                | N/A                | N/A                | N/A                | 36.94         | 35.36       | Negative      | true                  | True negative |
|                | V0010862   |                    |                   | 28.46                | N/A                | N/A                | 38.63              | 36.94         | 35.36       | Negative    | V0012701     |                      |                     | 30.38                | N/A                | N/A                | N/A                | 36.94         | 35.36       | Negative      | true                  | True negative |
|                | V0010888   |                    |                   | 28.49                | N/A                | N/A                | 38.94              | 36.94         | 35.36       | Negative    | V0012707     |                      |                     | 30.64                | 37.43              | N/A                | 41.53              | 36.94         | 35.36       | Negative      | true                  | True negative |
|                | V0010750   |                    |                   | 30.04                | 36.63              | 36.73              | 36.17              | 38.28         | 35.38       | Negative    | V0012728     |                      |                     | 30.76                | N/A                | 43.92              | N/A                | 38.28         | 35.38       | Negative      | true                  | True negative |
|                | V0011036   |                    |                   | 28.97                | 44.53              | 39.92              | 43.86              | 38.28         | 35.38       | Negative    | V0012689     |                      |                     | 34.96                | N/A                | N/A                | N/A                | 37.60         | 35.92       | Negative      | true                  | True negative |
|                | V0010899   |                    |                   | 29.34                | N/A                | N/A                | N/A                | 37.60         | 35.92       | Negative    | V0012492     |                      |                     | 33.14                | N/A                | N/A                | N/A                | 37.60         | 35.92       | Negative      | true                  | True negative |
|                | V0011029   |                    |                   | 28.76                | N/A                | N/A                | N/A                | 37.60         | 35.92       | Negative    | V0012685     |                      |                     | 36.11                | N/A                | N/A                | N/A                | 37.60         | 35.92       | Negative      | true                  | True negative |
|                | V0011039   |                    |                   | 28.91                | N/A                | N/A                | 38.45              | 37.60         | 35.92       | Negative    | V0012682     |                      |                     | 33.15                | N/A                | N/A                | N/A                | 37.60         | 35.92       | Negative      | true                  | True negative |
|                | V0011045   |                    |                   | 28.74                | N/A                | N/A                | N/A                | 37.60         | 35.92       | Negative    | V0012725     |                      |                     | 32.57                | 43.35              | N/A                | 42.64              | 37.60         | 35.92       | Negative      | true                  | True negative |
|                | V0011054   |                    |                   | 27.90                | N/A                | 42.16              | 39.60              | 37.60         | 35.92       | Negative    | V0012719     |                      |                     | 34.13                | N/A                | N/A                | N/A                | 37.60         | 35.92       | Negative      | true                  | True negative |
|                | V0011767   |                    |                   | 29.27                | N/A                | N/A                | N/A                | 37.60         | 35.92       | Negative    | V0012489     |                      |                     | 32.37                | N/A                | N/A                | N/A                | 37.60         | 35.92       | Negative      | true                  | True negative |
|                | V0012985   |                    |                   | 29.12                | 37.91              | N/A                | N/A                | 36.22         | 36.12       | Negative    | V0012720     |                      |                     | 32.44                | N/A                | N/A                | N/A                | 36.13         | 36.95       | Negative      | true                  | True negative |
|                | V0011484   |                    |                   | 28.79                | N/A                | N/A                | N/A                | 39.12         | 37.98       | Negative    | V0012490     |                      |                     | 32.08                | N/A                | N/A                | N/A                | 39.12         | 37.98       | Negative      | true                  | True negative |
|                | V0010674   |                    |                   | 28.13                | 43.35              | N/A                | 43.10              | 37.30         | 37.12       | Negative    | V0012487     |                      |                     | 38.06                | N/A                | N/A                | N/A                | 37.30         | 37.12       | Negative      | true                  | True negative |
|                | V0011742   |                    |                   | 28.20                | 44.75              | N/A                | N/A                | 37.30         | 37.12       | Negative    | V0012493     |                      |                     | 32.66                | 42.60              | 41.67              | N/A                | 37.30         | 37.12       | Negative      | true                  | True negative |
|                | V0010710   |                    |                   | 26.69                | N/A                | N/A                | N/A                | 37.30         | 37.12       | Negative    | V0012496     |                      |                     | 35.36                | N/A                | N/A                | 42.02              | 37.30         | 37.12       | Negative      | true                  | True negative |
|                | V0010702   |                    |                   | 28.03                | N/A                | N/A                | 41.83              | 37.30         | 37.12       | Negative    | V0012575     |                      |                     | 31.87                | 41.56              | 41.20              | N/A                | 37.30         | 37.12       | Negative      | true                  | True negative |
|                | V0011658   |                    |                   | 28.37                | N/A                | 38.07              | N/A                | 37.30         | 37.12       | Negative    | V0012683     |                      |                     | 32.42                | N/A                | N/A                | N/A                | 37.30         | 37.12       | Negative      | true                  | True negative |
|                | V0010644   |                    |                   | 29.18                | N/A                | N/A                | 43.52              | 37.30         | 37.12       | Negative    | V0012690     |                      |                     | 30.53                | N/A                | N/A                | 43.73              | 37.30         | 37.12       | Negative      | true                  | True negative |
|                | V0013010   |                    |                   | 28.21                | 43.26              | N/A                | 37.98              | 34.78         | 36.70       | Negative    | V0012579     |                      |                     | 34.78                | N/A                | N/A                | N/A                | 35.17         | 35.76       | Negative      | true                  | True negative |
|                | V0010762   |                    |                   | 29.17                | N/A                | 43.66              | N/A                | 36.09         | 37.33       | Negative    | V0012574     |                      |                     | 29.33                | N/A                | 39.45              | 38.15              | 35.17         | 35.76       | Negative      | true                  | True negative |
|                | V0011433   |                    |                   | 28.97                | 40.69              | 39.36              | 42.44              | 36.09         | 37.33       | Negative    | V0012518     |                      |                     | 31.47                | N/A                | N/A                | 43.68              | 35.17         | 35.76       | Negative      | true                  | True negative |
|                | V0011650   |                    |                   | 31.02                | N/A                | N/A                | N/A                | 35.44         | 35.89       | Negative    | V0012521     |                      |                     | 32.85                | N/A                | N/A                | N/A                | 35.17         | 35.76       | Negative      | true                  | True negative |
|                | V0011678   |                    |                   | 29.09                | 42.88              | 42.01              | N/A                | 36.22         | 36.12       | Negative    | V0012567     |                      |                     | 34.98                | N/A                | N/A                | N/A                | 35.17         | 35.76       | Negative      | true                  | True negative |
|                | V0013241   |                    |                   | 28.14                | 39.25              | N/A                | 40.34              | 34.89         | 35.60       | Negative    | V0012532     |                      |                     | 34.64                | N/A                | N/A                | N/A                | 34.89         | 35.60       | Negative      | true                  | True negative |
|                | V0012786   |                    |                   | 28.25                | N/A                | N/A                | 42.23              | 36.30         | 34.83       | Negative    | V0012540     |                      |                     | 34.40                | N/A                | N/A                | N/A                | 36.91         | 35.28       | Negative      | true                  | True negative |
|                | V0012926   |                    |                   | 29.32                | N/A                | N/A                | N/A                | 36.30         | 34.83       | Negative    | V0012537     |                      |                     | 36.21                | N/A                | N/A                | N/A                | 36.91         | 35.28       | Negative      | true                  | True negative |
|                | V0012921   |                    |                   | 28.25                | N/A                | N/A                | 44.53              | 36.30         | 34.83       | Negative    | V0012511     |                      |                     | 32.21                | N/A                | N/A                | N/A                | 36.91         | 35.28       | Negative      | true                  | True negative |
|                | V0013398   |                    |                   | 28.26                | N/A                | N/A                | 41.01              | 36.90         | 36.37       | Negative    | V0012500     |                      |                     | 29.79                | N/A                | N/A                | N/A                | 36.91         | 35.28       | Negative      | true                  | True negative |
|                | V0013014   |                    |                   | 28.99                | N/A                | N/A                | N/A                | 36.95         | 36.94       | Negative    | V0012556     |                      |                     | 34.46                | N/A                | N/A                | N/A                | 35.83         | 36.17       | Negative      | true                  | True negative |
|                | V0014305   |                    |                   | 29.01                | N/A                | N/A                | N/A                | 36.95         | 36.94       | Negative    | V0012555     |                      |                     | 34.12                | N/A                | N/A                | N/A                | 35.83         | 36.17       | Negative      | true                  | True negative |
|                | V0013231   |                    |                   | 27.38                | 39.57              | 38.67              | 39.17              | 36.95         | 36.94       | Negative    | V0010599     |                      |                     | 33.16                | N/A                | N/A                | N/A                | 35.83         | 36.17       | Negative      | true                  | True negative |
|                | V0013204   |                    |                   | 29.18                | N/A                | N/A                | N/A                | 35.77         | 36.53       | Negative    | V0012550     |                      |                     | 34.94                | N/A                | N/A                | N/A                | 35.83         | 36.17       | Negative      | true                  | True negative |
|                | V0013948   |                    |                   | 27.53                | N/A                | N/A                | N/A                | 36.95         | 36.94       | Negative    | V0012531     |                      |                     | 31.28                | N/A                | 37.99              | N/A                | 37.06         | 35.68       | Negative      | true                  | True negative |
|                | V0014222   |                    |                   | 27.04                | 37.62              | N/A                | 41.66              | 36.95         | 36.94       | Negative    | V0012495     |                      |                     | 31.73                | N/A                | 44.85              | 41.52              | 37.06         | 35.68       | Negative      | true                  | True negative |
|                | V0014249   |                    |                   | 28.19                | 39.93              | N/A                | 43.67              | 35.77         | 36.53       | Negative    | V0012508     |                      |                     | 33.84                | N/A                | N/A                | N/A                | 37.06         | 35.68       | Negative      | true                  | True negative |
|                | V0014118   |                    |                   | 27.31                | N/A                | N/A                | N/A                | 35.77         | 36.53       | Negative    | V0012524     |                      |                     | 31.10                | N/A                | N/A                | N/A                | 37.06         | 35.68       | Negative      | true                  | True negative |
|                | V0014227   |                    |                   | 27.88                | 43.83              | N/A                | N/A                | 35.77         | 36.53       | Negative    | V0012560     |                      |                     | 35.77                | 37.27              | N/A                | N/A                | 37.06         | 35.68       | Negative      | true                  | True negative |
|                | V0013205   |                    |                   | 29.39                | N/A                | N/A                | N/A                | 35.77         | 36.53       | Negative    | V0012565     |                      |                     | 31.81                | N/A                | 39.16              | N/A                | 37.06         | 35.68       | Negative      | true                  | True negative |
|                | V0014243   |                    |                   | 27.88                | 43.07              | N/A                | 43.56              | 36.95         | 36.94       | Negative    | V0012534     |                      |                     | 28.86                | N/A                | N/A                | N/A                | 37.06         | 35.68       | Negative      | true                  | True negative |
|                | V0014177   |                    |                   | 29.15                | N/A                | N/A                | 42.86              | 36.95         | 36.94       | Negative    | V0012563     |                      |                     | 29.85                | N/A                | N/A                | N/A                | 37.06         | 35.68       | Negative      | true                  | True negative |
|                | V0014221   |                    |                   | 29.22                | N/A                | N/A                | 40.19              | 36.95         | 36.94       | Negative    | V0012519     |                      |                     | 31.50                | N/A                | 38.10              | N/A                | 37.06         | 35.68       | Negative      | true                  | True negative |
|                | V0014341   |                    |                   | 28.22                | N/A                | N/A                | 38.89              | 36.95         | 36.94       | Negative    | V0012549     |                      |                     | 31.26                | N/A                | N/A                | N/A                | 37.06         | 35.68       | Negative      | true                  | True negative |
|                | V0013980   |                    |                   | 28.42                | 43.10              | 44.80              | N/A                | 35.46         | 36.18       | Negative    | V0012498     |                      |                     | 34.32                | N/A                | N/A                | 38.65              | 37.06         | 35.68       | Negative      | true                  | True negative |
|                | V0014256   |                    |                   | 27.56                | 42.38              | N/A                | 42.74              | 36.95         | 36.94       | Negative    | V0012559     |                      |                     | 33.44                | N/A                | N/A                | N/A                | 37.06         | 35.68       | Negative      | true                  | True negative |
|                | V0010569   |                    |                   | 28.56                | N/A                | 41.00              | 43.48              | 36.95         | 36.94       | Negative    | V0010597     |                      |                     | 31.21                | N/A                | N/A                | N/A                | 37.06         | 35.68       | Negative      | true                  | True negative |
|                | V0014168   |                    |                   | 26.07                | 44.53              | N/A                | N/A                | 35.77         | 36.53       | Negative    | V0012497     |                      |                     | 30.33                | N/A                | N/A                | N/A                | 37.06         | 35.68       | Negative      | true                  | True negative |
|                | V0014258   |                    |                   | 29.34                | 43.46              | N/A                | 38.76              | 35.77         | 36.53       | Negative    | V0012527     |                      |                     | 30.15                | N/A                | N/A                | N/A                | 37.06         | 35.68       | Negative      | true                  | True negative |
|                | V0014022   |                    |                   | 30.42                | 41.57              | N/A                | N/A                | 35.77         | 36.53       | Negative    | V0012514     |                      |                     | 35.05                | N/A                | N/A                | 37.47              | 37.06         | 35.68       | Negative      | true                  | True negative |
|                | V0014174   |                    |                   | 28.14                | N/A                | N/A                | N/A                | 35.77         | 36.53       | Negative    | V0012516     |                      |                     | 32.72                | N/A                | N/A                | 39.05              | 37.06         | 35.68       | Negative      | true                  | True negative |
|                | V0012894   |                    |                   | 27.49                | N/A                | 42.45              | N/A                | 35.37         | 35.45       | Negative    | V0012552     |                      |                     | 32.39                | N/A                | N/A                | N/A                | 35.37         | 35.45       | Negative      | true                  | True negative |
|                | V0015894   |                    |                   | 27.65                | N/A                | N/A                | N/A                | 36.42         | 34.78       | Negative    | V0012485     |                      |                     | 34.40                | N/A                | N/A                | N/A                | 36.42         | 34.78       | Negative      | true                  | True negative |
|                | V0015689   |                    |                   | 29.92                | N/A                | N/A                | N/A                | 36.42         | 34.78       | Negative    | V0012545     |                      |                     | 31.33                | N/A                | N/A                | N/A                | 36.42         | 34.78       | Negative      | true                  | True negative |
|                | V0015939   |                    |                   | 29.46                | N/A                | 39.31              | N/A                | 36.42         | 34.78       | Negative    | V0012551     |                      |                     | 38.14                | N/A                | N/A                | N/A                | 36.42         | 34.78       | Negative      | true                  | True negative |
|                | V0015700   |                    |                   | 28.72                | 37.21              | N/A                | N/A                | 35.46         | 35.95       | Negative    | V0012568     |                      |                     | 31.09                | N/A                | N/A                | N/A                | 36.42         | 34.78       | Negative      | true                  | True negative |
|                | V0015931   |                    |                   | 29.33                | 37.19              | N/A                | N/A                | 35.46         | 35.95       | Negative    | V0012488     |                      |                     | 34.00                | N/A                | N/A                | N/A                | 36.10         | 36.36       | Negative      | true                  | True negative |
|                | V0015917   |                    |                   | 28.31                | N/A                | N/A                | N/A                | 36.42         | 34.78       | Negative    | V0012491     |                      |                     | 33.63                | N/A                | N/A                | N/A                | 36.10         | 36.36       | Negative      | true                  | True negative |

|          |  |  |  |       |       |       |       |       |       |          |          |  |  |  |       |       |       |       |       |       |          |      |               |
|----------|--|--|--|-------|-------|-------|-------|-------|-------|----------|----------|--|--|--|-------|-------|-------|-------|-------|-------|----------|------|---------------|
| V0015298 |  |  |  | 28.77 | 37.21 | 36.07 | N/A   | 35.46 | 35.95 | Negative | V0012501 |  |  |  | 32.64 | N/A   | N/A   | N/A   | 36.10 | 36.36 | Negative | true | True negative |
| V0015687 |  |  |  | 32.34 | N/A   | N/A   | N/A   | 35.46 | 35.95 | Negative | V0012572 |  |  |  | 30.97 | N/A   | N/A   | N/A   | 36.10 | 36.36 | Negative | true | True negative |
| V0010574 |  |  |  | 26.68 | 40.65 | N/A   | N/A   | 42.30 | 34.78 | Negative | V0012573 |  |  |  | 35.09 | N/A   | N/A   | N/A   | 36.10 | 36.36 | Negative | true | True negative |
| V0015982 |  |  |  | 29.10 | N/A   | N/A   | 41.40 | 36.20 | 36.35 | Negative | V0012576 |  |  |  | 33.84 | N/A   | N/A   | N/A   | 36.10 | 36.36 | Negative | true | True negative |
| V0016413 |  |  |  | 29.20 | N/A   | N/A   | 38.00 | 37.03 | 36.52 | Negative | V0016982 |  |  |  | 32.90 | N/A   | N/A   | N/A   | 36.39 | 37.05 | Negative | true | True negative |
| V0016407 |  |  |  | 29.90 | N/A   | 37.10 | 37.70 | 37.03 | 36.52 | Negative | V0016984 |  |  |  | 35.00 | N/A   | N/A   | N/A   | 36.39 | 37.05 | Negative | true | True negative |
| V0016754 |  |  |  | 29.01 | N/A   | N/A   | 37.68 | 36.95 | 35.95 | Negative | V0016986 |  |  |  | 34.70 | N/A   | N/A   | N/A   | 36.39 | 37.05 | Negative | true | True negative |
| V0016764 |  |  |  | 29.07 | N/A   | N/A   | N/A   | 36.39 | 37.05 | Negative | V0016991 |  |  |  | 32.10 | N/A   | N/A   | N/A   | 36.39 | 37.05 | Negative | true | True negative |
| V0015373 |  |  |  | 28.90 | N/A   | N/A   | N/A   | 37.03 | 36.52 | Negative | V0017001 |  |  |  | 31.30 | N/A   | N/A   | N/A   | 36.39 | 37.05 | Negative | true | True negative |
| V0016400 |  |  |  | 29.30 | N/A   | N/A   | N/A   | 37.03 | 36.52 | Negative | V0017011 |  |  |  | 30.10 | N/A   | N/A   | N/A   | 36.39 | 37.05 | Negative | true | True negative |
| V0015694 |  |  |  | 28.80 | N/A   | N/A   | N/A   | 37.03 | 36.52 | Negative | V0017014 |  |  |  | 31.90 | N/A   | N/A   | N/A   | 36.39 | 37.05 | Negative | true | True negative |
| V0015820 |  |  |  | 28.82 | 36.22 | 36.51 | N/A   | 34.85 | 35.12 | Negative | V0016792 |  |  |  | 34.04 | N/A   | N/A   | N/A   | 37.78 | 36.02 | Negative | true | True negative |
| V0015407 |  |  |  | 28.39 | N/A   | N/A   | N/A   | 35.41 | 36.85 | Negative | V0016806 |  |  |  | 37.55 | N/A   | N/A   | N/A   | 37.78 | 36.02 | Negative | true | True negative |
| V0009668 |  |  |  | 30.19 | N/A   | N/A   | N/A   | 37.03 | 36.11 | Negative | V0016820 |  |  |  | 33.40 | N/A   | N/A   | N/A   | 37.78 | 36.02 | Negative | true | True negative |
| V0015406 |  |  |  | 29.07 | N/A   | N/A   | 38.14 | 35.70 | 36.11 | Negative | V0016782 |  |  |  | 33.98 | 36.52 | 37.58 | 36.25 | 35.54 | 35.88 | Negative | true | True negative |
| V0016864 |  |  |  | 29.26 | N/A   | N/A   | N/A   | 35.91 | 36.21 | Negative | V0016987 |  |  |  | 32.20 | 45.00 | 44.60 | 45.00 | 36.46 | 36.01 | Negative | true | True negative |
| V0015380 |  |  |  | 27.13 | N/A   | N/A   | N/A   | 36.76 | 35.76 | Negative | V0016988 |  |  |  | 32.70 | 45.00 | 45.00 | 45.00 | 36.46 | 36.01 | Negative | true | True negative |
| V0015378 |  |  |  | 29.19 | N/A   | N/A   | N/A   | 37.51 | 36.06 | Negative | V0016993 |  |  |  | 34.80 | 45.00 | 45.00 | 45.00 | 36.46 | 36.01 | Negative | true | True negative |
| V0017052 |  |  |  | 28.90 | N/A   | N/A   | 37.42 | 36.76 | 35.76 | Negative | V0016994 |  |  |  | 31.10 | 45.00 | 45.00 | 45.00 | 36.46 | 36.01 | Negative | true | True negative |
| V0015374 |  |  |  | 29.14 | N/A   | N/A   | N/A   | 36.76 | 35.76 | Negative | V0016998 |  |  |  | 32.50 | 45.00 | 45.00 | 45.00 | 36.46 | 36.01 | Negative | true | True negative |
| V0016877 |  |  |  | 30.27 | N/A   | N/A   | N/A   | 36.76 | 35.76 | Negative | V0017000 |  |  |  | 32.30 | 45.00 | 41.20 | 45.00 | 36.46 | 36.01 | Negative | true | True negative |
| V0017193 |  |  |  | 28.28 | N/A   | N/A   | N/A   | 36.76 | 35.76 | Negative | V0017009 |  |  |  | 32.40 | 45.00 | 45.00 | 45.00 | 36.46 | 36.01 | Negative | true | True negative |
| V0017194 |  |  |  | 27.28 | N/A   | N/A   | 38.31 | 36.76 | 35.76 | Negative | V0017012 |  |  |  | 32.80 | 45.00 | 45.00 | 40.30 | 36.46 | 36.01 | Negative | true | True negative |
| V0016791 |  |  |  | 28.05 | N/A   | N/A   | 44.88 | 36.76 | 35.76 | Negative | V0017017 |  |  |  | 33.00 | 45.00 | 45.00 | 45.00 | 36.46 | 36.01 | Negative | true | True negative |
| V0017262 |  |  |  | 27.02 | N/A   | N/A   | 38.76 | 36.76 | 35.76 | Negative | V0017018 |  |  |  | 28.70 | 45.00 | 45.00 | 45.00 | 36.46 | 36.01 | Negative | true | True negative |
| V0016803 |  |  |  | 27.13 | N/A   | N/A   | 38.01 | 36.76 | 35.76 | Negative | V0017021 |  |  |  | 33.70 | 45.00 | 45.00 | 45.00 | 36.46 | 36.01 | Negative | true | True negative |
| V0017354 |  |  |  | 31.31 | N/A   | N/A   | N/A   | 35.78 | 36.30 | Negative | V0015057 |  |  |  | 34.93 | N/A   | N/A   | N/A   | 35.16 | 36.00 | Negative | true | True negative |
| V0016985 |  |  |  | 33.43 | N/A   | N/A   | N/A   | 35.78 | 36.30 | Negative | V0018455 |  |  |  | 34.42 | N/A   | N/A   | N/A   | 35.67 | 36.11 | Negative | true | True negative |
| V0018463 |  |  |  | 29.11 | 37.02 | 37.13 | 38.30 | 35.78 | 36.30 | Negative | V0018462 |  |  |  | 32.88 | N/A   | N/A   | N/A   | 35.67 | 36.11 | Negative | true | True negative |
| V0018465 |  |  |  | 30.14 | 37.06 | N/A   | 38.03 | 35.78 | 36.30 | Negative | V0018439 |  |  |  | 34.08 | N/A   | N/A   | N/A   | 35.67 | 36.11 | Negative | true | True negative |
| V0018411 |  |  |  | 28.94 | N/A   | N/A   | N/A   | 36.02 | 35.87 | Negative | V0019258 |  |  |  | 33.90 | N/A   | N/A   | N/A   | 35.10 | 35.65 | Negative | true | True negative |
| V0018364 |  |  |  | 27.85 | 36.92 | N/A   | 38.24 | 36.13 | 35.17 | Negative | V0019262 |  |  |  | 34.00 | 36.70 | N/A   | N/A   | 35.10 | 35.65 | Negative | true | True negative |
| V0015036 |  |  |  | 29.49 | N/A   | N/A   | N/A   | 36.13 | 35.17 | Negative | V0019268 |  |  |  | 32.80 | N/A   | N/A   | N/A   | 35.10 | 35.65 | Negative | true | True negative |
| V0017794 |  |  |  | 27.27 | 23.65 | 24.36 | 24.57 | 34.93 | 36.37 | Positive | V0017791 |  |  |  | 34.40 | 34.80 | 35.00 | 34.90 | 34.82 | 36.02 | Positive | true | True positive |
| V0017841 |  |  |  | 28.42 | 24.36 | 23.92 | 24.09 | 34.93 | 36.37 | Positive | V0017792 |  |  |  | 30.40 | 31.30 | 32.80 | 31.20 | 34.82 | 36.02 | Positive | true | True positive |
| V0017807 |  |  |  | 28.94 | 18.49 | 19.18 | 19.46 | 34.93 | 36.37 | Positive | V0017798 |  |  |  | 33.80 | 23.70 | 24.20 | 23.00 | 34.82 | 36.02 | Positive | true | True positive |
| V0017813 |  |  |  | 28.12 | 25.18 | 24.60 | 24.71 | 34.93 | 36.37 | Positive | V0017800 |  |  |  | 29.80 | 24.70 | 24.90 | 24.50 | 34.82 | 36.02 | Positive | true | True positive |
| V0017831 |  |  |  | 28.62 | 16.86 | 18.08 | 18.51 | 34.93 | 36.37 | Positive | V0017804 |  |  |  | 29.30 | 27.20 | 27.90 | 27.00 | 34.82 | 36.02 | Positive | true | True positive |
| V0017789 |  |  |  | 27.95 | 28.21 | 28.48 | 28.52 | 34.93 | 36.37 | Positive | V0017819 |  |  |  | 34.50 | 32.10 | 33.50 | 34.10 | 34.82 | 36.02 | Positive | true | True positive |
| V0017796 |  |  |  | 28.63 | 18.81 | 18.84 | 18.91 | 34.93 | 36.37 | Positive | V0017825 |  |  |  | 33.10 | 25.70 | 26.90 | 26.90 | 34.82 | 36.02 | Positive | true | True positive |
| V0017817 |  |  |  | 27.95 | 28.80 | 29.11 | 29.24 | 34.93 | 36.37 | Positive | V0017835 |  |  |  | 30.50 | 32.20 | 32.10 | 31.60 | 34.82 | 36.02 | Positive | true | True positive |
| V0017821 |  |  |  | 28.15 | 24.05 | 24.25 | 24.43 | 34.93 | 36.37 | Positive | V0017836 |  |  |  | 33.80 | 30.20 | 30.40 | 30.20 | 34.82 | 36.02 | Positive | true | True positive |
| V0017832 |  |  |  | 29.20 | 17.38 | 17.52 | 17.70 | 34.93 | 36.37 | Positive | V0017837 |  |  |  | 32.30 | 24.00 | 24.30 | 24.00 | 34.82 | 36.02 | Positive | true | True positive |
| V0017801 |  |  |  | 25.49 | 16.73 | 16.39 | 15.97 | 34.93 | 36.37 | Positive | V0017839 |  |  |  | 34.10 | 31.70 | 31.50 | 31.90 | 34.82 | 36.02 | Positive | true | True positive |
| V0017827 |  |  |  | 28.70 | 25.40 | 25.59 | 25.69 | 35.85 | 37.10 | Positive | V0017828 |  |  |  | 31.00 | 26.10 | 26.70 | 26.80 | 34.82 | 36.02 | Positive | true | True positive |
| V0018461 |  |  |  | 29.18 | 30.68 | 32.15 | 32.93 | 35.78 | 36.30 | Positive | V0018451 |  |  |  | 32.44 | 26.27 | 25.99 | 25.69 | 35.67 | 36.11 | Positive | true | True positive |
| V0018464 |  |  |  | 29.38 | 31.98 | 32.29 | 32.47 | 35.78 | 36.30 | Positive | V0018477 |  |  |  | 33.54 | 32.30 | 32.21 | 32.12 | 35.67 | 36.11 | Positive | true | True positive |
| V0018374 |  |  |  | 29.62 | 13.39 | 14.94 | 15.31 | 36.02 | 35.87 | Positive | V0019280 |  |  |  | 32.50 | 27.90 | 28.90 | 29.30 | 35.10 | 35.65 | Positive | true | True positive |
| V0017196 |  |  |  | 29.11 | 16.55 | 17.82 | 18.32 | 36.76 | 35.76 | Positive | V0016989 |  |  |  | 31.20 | 28.50 | 28.50 | 29.30 | 36.46 | 36.01 | Positive | true | True positive |
| V0016771 |  |  |  | 26.50 | 23.10 | 19.20 | 19.10 | 37.03 | 36.52 | Positive | V0017016 |  |  |  | 33.00 | 34.30 | 29.10 | 29.00 | 36.39 | 37.05 | Positive | true | True positive |
| V0015396 |  |  |  | 28.60 | 35.05 | 36.18 | 37.94 | 35.70 | 36.11 | Positive | V0016786 |  |  |  | 34.38 | 34.20 | 34.41 | 36.71 | 37.78 | 36.02 | Positive | true | True positive |
| V0015398 |  |  |  | 26.60 | 14.19 | 15.77 | 15.94 | 36.90 | 35.71 | Positive | V0016811 |  |  |  | 33.70 | 34.00 | 35.15 | 34.85 | 37.78 | 36.02 | Positive | true | True positive |
| V0007630 |  |  |  | 29.10 | 21.48 | 23.29 | 23.16 | 33.84 | 33.95 | Positive | V0007330 |  |  |  | 30.15 | 28.36 | 28.45 | 28.28 | 34.28 | 34.55 | Positive | true | True positive |
| V0007197 |  |  |  | 28.49 | 23.06 | 24.23 | 24.17 | 34.92 | 34.18 | Positive | V0005904 |  |  |  | 35.78 | 31.98 | 31.96 | 32.17 | 34.75 | 34.35 | Positive | true | True positive |
| V0008357 |  |  |  | 29.45 | 21.49 | 23.53 | 24.17 | 34.35 | 34.00 | Positive | V0003705 |  |  |  | 34.64 | 34.08 | 34.65 | 34.02 | 34.75 | 34.35 | Positive | true | True positive |
| V0008371 |  |  |  | 29.29 | 17.10 | 19.07 | 19.20 | 34.89 | 34.49 | Positive | V0003697 |  |  |  | 35.26 | 27.79 | 27.85 | 27.71 | 34.75 | 34.35 | Positive | true | True positive |
| V0010895 |  |  |  | 29.33 | 26.08 | 26.80 | 27.19 | 38.28 | 35.38 | Positive | V0012730 |  |  |  | 30.66 | 32.50 | 32.34 | 32.65 | 38.28 | 35.38 | Positive | true | True positive |
| V0011736 |  |  |  | 28.71 | 34.73 | 34.87 | 35.54 | 34.78 | 36.70 | Positive | V0012535 |  |  |  | 31.80 | 30.11 | 30.51 | 30.59 | 35.17 | 35.76 | Positive | true | True positive |
| V0011727 |  |  |  | 28.49 | 27.96 | 29.20 | 29.04 | 34.78 | 36.70 | Positive | V0012580 |  |  |  | 30.24 | 33.12 | 33.35 | 33.78 | 35.17 | 35.76 | Positive | true | True positive |
| V0010757 |  |  |  | 28.60 | 16.49 | 17.23 | 17.09 | 36.43 | 36.11 | Positive | V0011478 |  |  |  | 34.59 | 30.42 | 31.01 | 31.38 | 36.43 | 36.11 | Positive | true | True positive |
| V0015941 |  |  |  | 29.27 | 16.67 | 18.43 | 18.47 | 35.46 | 35.95 | Positive | V0012566 |  |  |  | 30.31 | 31.79 | 31.69 | 32.29 | 36.42 | 34.78 | Positive | true | True positive |
| V0014312 |  |  |  | 27.97 | 14.82 | 16.26 | 16.66 | 35.46 | 35.95 | Positive | V0012571 |  |  |  | 32.21 | 26.46 | 27.46 | 27.35 | 36.10 | 36.36 | Positive | true | True positive |
| V0012907 |  |  |  | 29.70 | 15.19 | 16.42 | 17.14 | 36.30 | 34.83 | Positive | V0012510 |  |  |  | 31.88 | 26.80 | 26.91 | 27.05 | 36.91 | 35.28 | Positive | true | True positive |
