# Supplementary material for: Development and Implementation of a scalable and versatile test for COVID-19 diagnostics in rural communities
Source: bioRxiv or medRxiv preprint supplement (doi:10.1101/2021.03.01.21252679), 2021-03-08
Supplement: Supplementary file [file media-15.pdf]

| A           | B                                                   | C                                  | D                                     | E                                   | F                                    | G                                    | H                                    | I              | J                    | K                       |
|-------------|-----------------------------------------------------|------------------------------------|---------------------------------------|-------------------------------------|--------------------------------------|--------------------------------------|--------------------------------------|----------------|----------------------|-------------------------|
| Database ID | NCBI Description                                    | SK_N forward<br>GCTGCAATCGTCTACAAC | SK_N reverse<br>TGAACCTGTTGCCACTACGTG | SK_E forward<br>TTCGGAAGACAGGTACGTT | SK_E reverse<br>CACACAATCGAAGCGCAGTA | SK_S forward<br>GCTGGTGCTGCAGCTTATTA | SK_S reverse<br>AGGGTCAAGTGCACAGTCTA | 3' mismatches? | Multiple mismatches? | More than 1 primer set? |
| 1           | NC_045512.2  Severe acute respiratory syndrome coro |                                    |                                       |                                     |                                      |                                      |                                      |                |                      |                         |
| 2           | MW466791.1  Severe acute respiratory syndrome coro  |                                    |                                       |                                     |                                      |                                      |                                      |                |                      |                         |
| 3           | MW466792.1  Severe acute respiratory syndrome coro  |                                    |                                       |                                     |                                      |                                      |                                      |                |                      |                         |
| 4           | MW466793.1  Severe acute respiratory syndrome coro  |                                    |                                       |                                     |                                      |                                      |                                      |                |                      |                         |
| 5           | MW466794.1  Severe acute respiratory syndrome coro  |                                    |                                       |                                     |                                      |                                      |                                      |                |                      |                         |
| 6           | MW466795.1  Severe acute respiratory syndrome coro  |                                    |                                       |                                     |                                      |                                      |                                      |                |                      |                         |
| 7           | MW466796.1  Severe acute respiratory syndrome coro  |                                    |                                       |                                     |                                      |                                      |                                      |                |                      |                         |
| 8           | MW466797.1  Severe acute respiratory syndrome coro  |                                    |                                       |                                     |                                      |                                      |                                      |                |                      |                         |
| 9           | MW466798.1  Severe acute respiratory syndrome coro  |                                    |                                       |                                     |                                      |                                      |                                      |                |                      |                         |
| 10          | MW466799.1  Severe acute respiratory syndrome coro  |                                    |                                       |                                     |                                      |                                      |                                      |                |                      |                         |
| 11          | MW466800.1  Severe acute respiratory syndrome coro  |                                    |                                       |                                     |                                      |                                      |                                      |                |                      |                         |
| 12          | MW467418.1  Severe acute respiratory syndrome coro  |                                    |                                       |                                     |                                      |                                      |                                      |                |                      |                         |
| 13          | MW467419.1  Severe acute respiratory syndrome coro  |                                    | A                                     |                                     |                                      |                                      |                                      |                |                      |                         |
| 14          | MW467420.1  Severe acute respiratory syndrome coro  |                                    |                                       |                                     |                                      |                                      |                                      |                |                      |                         |
| 15          | MW467421.1  Severe acute respiratory syndrome coro  |                                    |                                       |                                     |                                      |                                      |                                      |                |                      |                         |
| 16          | MW467422.1  Severe acute respiratory syndrome coro  |                                    |                                       |                                     |                                      |                                      |                                      |                |                      |                         |
| 17          | MW467423.1  Severe acute respiratory syndrome coro  |                                    |                                       |                                     |                                      |                                      |                                      |                |                      |                         |
| 18          | MW467424.1  Severe acute respiratory syndrome coro  |                                    | A                                     |                                     |                                      |                                      |                                      |                |                      |                         |
| 19          | MW467425.1  Severe acute respiratory syndrome coro  |                                    | A                                     |                                     |                                      |                                      |                                      |                |                      |                         |
| 20          | MW467426.1  Severe acute respiratory syndrome coro  |                                    |                                       |                                     |                                      |                                      |                                      |                |                      |                         |
| 21          | MW467427.1  Severe acute respiratory syndrome coro  |                                    |                                       |                                     |                                      |                                      |                                      |                |                      |                         |
| 22          | MW467428.1  Severe acute respiratory syndrome coro  |                                    |                                       |                                     |                                      |                                      |                                      |                |                      |                         |
| 23          | MW467429.1  Severe acute respiratory syndrome coro  |                                    |                                       |                                     |                                      |                                      |                                      |                |                      |                         |
| 24          | MW467430.1  Severe acute respiratory syndrome coro  |                                    |                                       |                                     |                                      |                                      |                                      |                |                      |                         |
| 25          | MW467431.1  Severe acute respiratory syndrome coro  |                                    | A                                     |                                     |                                      |                                      |                                      |                |                      |                         |
| 26          | MW467432.1  Severe acute respiratory syndrome coro  |                                    |                                       |                                     |                                      |                                      |                                      |                |                      |                         |
| 27          | MW467433.1  Severe acute respiratory syndrome coro  |                                    |                                       |                                     |                                      |                                      |                                      |                |                      |                         |
| 28          | MW467434.1  Severe acute respiratory syndrome coro  |                                    |                                       |                                     |                                      |                                      |                                      |                |                      |                         |
| 29          | MW467435.1  Severe acute respiratory syndrome coro  |                                    |                                       |                                     |                                      |                                      |                                      |                |                      |                         |
| 30          | MW467436.1  Severe acute respiratory syndrome coro  |                                    |                                       |                                     |                                      |                                      |                                      |                |                      |                         |
| 31          | MW467437.1  Severe acute respiratory syndrome coro  |                                    |                                       |                                     |                                      |                                      |                                      |                |                      |                         |
| 32          | MW467438.1  Severe acute respiratory syndrome coro  |                                    |                                       |                                     |                                      |                                      |                                      |                |                      |                         |
| 33          | MW467439.1  Severe acute respiratory syndrome coro  |                                    |                                       |                                     |                                      |                                      |                                      |                |                      |                         |
| 34          | MW467440.1  Severe acute respiratory syndrome coro  |                                    |                                       |                                     |                                      |                                      |                                      |                |                      |                         |
| 35          | MW467441.1  Severe acute respiratory syndrome coro  |                                    |                                       |                                     |                                      |                                      |                                      |                |                      |                         |
| 36          | MW467442.1  Severe acute respiratory syndrome coro  |                                    |                                       |                                     |                                      |                                      |                                      |                |                      |                         |
| 37          | MW467443.1  Severe acute respiratory syndrome coro  |                                    |                                       |                                     |                                      |                                      |                                      |                |                      |                         |
| 38          | MW467444.1  Severe acute respiratory syndrome coro  |                                    |                                       |                                     |                                      |                                      |                                      |                |                      |                         |
| 39          | MW467445.1  Severe acute respiratory syndrome coro  |                                    |                                       |                                     |                                      |                                      |                                      |                |                      |                         |
| 40          | MW467446.1  Severe acute respiratory syndrome coro  |                                    |                                       |                                     |                                      |                                      |                                      |                |                      |                         |
| 41          | MW467447.1  Severe acute respiratory syndrome coro  |                                    |                                       |                                     |                                      |                                      |                                      |                |                      |                         |
| 42          | MW467448.1  Severe acute respiratory syndrome coro  |                                    |                                       |                                     |                                      |                                      |                                      |                |                      |                         |
| 43          | MW467449.1  Severe acute respiratory syndrome coro  |                                    |                                       |                                     |                                      |                                      |                                      |                |                      |                         |
| 44          | MW467450.1  Severe acute respiratory syndrome coro  |                                    |                                       |                                     |                                      |                                      |                                      |                |                      |                         |
| 45          | MW467451.1  Severe acute respiratory syndrome coro  |                                    | A                                     |                                     |                                      |                                      |                                      |                |                      |                         |
| 46          | MW467452.1  Severe acute respiratory syndrome coro  |                                    |                                       |                                     |                                      |                                      |                                      |                |                      |                         |
| 47          | MW467453.1  Severe acute respiratory syndrome coro  |                                    |                                       |                                     |                                      |                                      |                                      |                |                      |                         |
| 48          | MW467454.1  Severe acute respiratory syndrome coro  |                                    | A                                     |                                     |                                      |                                      |                                      |                |                      |                         |
| 49          | MW467455.1  Severe acute respiratory syndrome coro  |                                    |                                       |                                     |                                      |                                      |                                      |                |                      |                         |
| 50          | MW467456.1  Severe acute respiratory syndrome coro  |                                    |                                       |                                     |                                      |                                      |                                      |                |                      |                         |
| 51          | MW467457.1  Severe acute respiratory syndrome coro  |                                    | A                                     |                                     |                                      |                                      |                                      |                |                      |                         |
| 52          | MW467458.1  Severe acute respiratory syndrome coro  |                                    |                                       |                                     |                                      |                                      |                                      |                |                      |                         |
| 53          | MW467459.1  Severe acute respiratory syndrome coro  |                                    | A                                     |                                     |                                      |                                      |                                      |                |                      |                         |
| 54          | MW467460.1  Severe acute respiratory syndrome coro  |                                    |                                       |                                     |                                      |                                      |                                      |                |                      |                         |
| 55          | MW467461.1  Severe acute respiratory syndrome coro  |                                    |                                       |                                     |                                      |                                      |                                      |                |                      |                         |
| 56          | MW467462.1  Severe acute respiratory syndrome coro  |                                    |                                       |                                     |                                      |                                      |                                      |                |                      |                         |
| 57          | MW467463.1  Severe acute respiratory syndrome coro  |                                    |                                       |                                     |                                      |                                      |                                      |                |                      |                         |
| 58          | MW467464.1  Severe acute respiratory syndrome coro  |                                    |                                       |                                     |                                      |                                      |                                      |                |                      |                         |
| 59          | MW467465.1  Severe acute respiratory syndrome coro  |                                    | A                                     |                                     |                                      |                                      |                                      |                |                      |                         |
| 60          | MW467466.1  Severe acute respiratory syndrome coro  |                                    |                                       |                                     |                                      |                                      |                                      |                |                      |                         |
| 61          | MW467467.1  Severe acute respiratory syndrome coro  |                                    | C                                     |                                     |                                      |                                      |                                      |                |                      |                         |
| 62          | MW467468.1  Severe acute respiratory syndrome coro  |                                    |                                       |                                     |                                      |                                      | A                                    |                |                      |                         |
| 63          | MW467469.1  Severe acute respiratory syndrome coro  |                                    |                                       |                                     |                                      |                                      |                                      |                |                      |                         |
| 64          | MW467470.1  Severe acute respiratory syndrome coro  |                                    |                                       |                                     |                                      |                                      |                                      |                |                      |                         |
| 65          | MW467471.1  Severe acute respiratory syndrome coro  |                                    |                                       |                                     |                                      |                                      |                                      |                |                      |                         |
| 66          | MW467472.1  Severe acute respiratory syndrome coro  |                                    |                                       |                                     |                                      |                                      |                                      |                |                      |                         |
| 67          | MW467473.1  Severe acute respiratory syndrome coro  |                                    |                                       |                                     |                                      |                                      |                                      |                |                      |                         |



































































































































































































































































































































































































































































































































































































































































































































































































































































































































































|       |            |                                        |       |         |       |       |       |       |
|-------|------------|----------------------------------------|-------|---------|-------|-------|-------|-------|
| 32896 | MT007544.1 | Severe acute respiratory syndrome coro | ..... | .....   | ..... | ..... | ..... | ..... |
| 32897 | MN996527.1 | Severe acute respiratory syndrome coro | ..... | .....   | ..... | ..... | ..... | ..... |
| 32898 | MN996528.1 | Severe acute respiratory syndrome coro | ..... | .....   | ..... | ..... | ..... | ..... |
| 32899 | MN996529.1 | Severe acute respiratory syndrome coro | ..... | .....   | ..... | ..... | ..... | ..... |
| 32900 | MN996530.1 | Severe acute respiratory syndrome coro | ..... | .....   | ..... | ..... | ..... | ..... |
| 32901 | MN996531.1 | Severe acute respiratory syndrome coro | ..... | .....   | ..... | ..... | ..... | ..... |
| 32902 | MN988668.1 | Severe acute respiratory syndrome coro | ..... | .....   | ..... | ..... | ..... | ..... |
| 32903 | MN988669.1 | Severe acute respiratory syndrome coro | ..... | .....   | ..... | ..... | ..... | ..... |
| 32904 | MN994467.1 | Severe acute respiratory syndrome coro | ..... | .....   | ..... | ..... | ..... | ..... |
| 32905 | MN994468.1 | Severe acute respiratory syndrome coro | ..... | .....   | ..... | ..... | ..... | ..... |
| 32906 | MN997409.1 | Severe acute respiratory syndrome coro | ..... | .....   | ..... | ..... | ..... | ..... |
| 32907 | MN988713.1 | Severe acute respiratory syndrome coro | ..... | *R..... | ..... | ..... | ..... | ..... |
| 32908 | MN938384.1 | Severe acute respiratory syndrome coro | ..... | .....   | ..... | ..... | ..... | ..... |
| 32909 | MN975262.1 | Severe acute respiratory syndrome coro | ..... | .....   | ..... | ..... | ..... | ..... |
| 32910 | MN985325.1 | Severe acute respiratory syndrome coro | ..... | .....   | ..... | ..... | ..... | ..... |
| 32911 | MN908947.3 | Severe acute respiratory syndrome coro | ..... | .....   | ..... | ..... | ..... | ..... |



Removed from analysis

| A           | B                                                   | C                  | D                   | E                     | F                    | G                      | H                      | I           | J             | K |
|-------------|-----------------------------------------------------|--------------------|---------------------|-----------------------|----------------------|------------------------|------------------------|-------------|---------------|---|
| Database ID | NCBI Description                                    | GCTGCAATCGTGTACAAC | TGAAGTGTTCGACTACGTG | TTCGGAAGAGACAGGTACGTT | CACACAATCGAAGCGCAGTA | GCTGGTCTGCGAGCTTATTA   | AGGGTCAAGTGCACAGTCTA   | Incomplete? | Poor quality? |   |
| 350         | MW454488.1   Severe acute respiratory syndrome coro |                    |                     |                       |                      | NNNNNNNNNNNNNNNNNNNNNN | NNNNNNNNNN             |             |               | 1 |
| 523         | MW454668.1   Severe acute respiratory syndrome coro |                    |                     |                       |                      |                        | NNNNNNNN               |             |               | 1 |
| 543         | MW454689.1   Severe acute respiratory syndrome coro |                    |                     |                       |                      | NNNNNNNNNNNNNNNNNNNNNN |                        |             |               | 1 |
| 782         | MW446219.1   Severe acute respiratory syndrome coro |                    |                     |                       |                      | NNNN                   |                        |             |               | 1 |
| 994         | MW433767.1   Severe acute respiratory syndrome coro |                    |                     |                       |                      |                        | NNNNNNNNNNNNNNNNNNNNNN |             |               | 1 |
| 2088        | MW403701.1   Severe acute respiratory syndrome coro |                    |                     |                       | NNNNNNNNNNNN         |                        |                        |             |               | 1 |
| 2186        | MW390866.1   Severe acute respiratory syndrome coro |                    |                     |                       | NNNNNNNN             |                        |                        |             |               | 1 |
| 2720        | MW332829.1   Severe acute respiratory syndrome coro |                    |                     |                       |                      | NNNNNNNNNNNNNNNNNNNNNN |                        |             |               | 1 |
| 2984        | MW320729.1   Severe acute respiratory syndrome coro |                    |                     |                       |                      | NNNNNNNNNNNNNNNNNNNNNN |                        |             |               | 1 |
| 2992        | MW320747.1   Severe acute respiratory syndrome coro |                    |                     |                       |                      | NNNNNNNNNNNNNNNNNNNNNN | NNNNNNNNNNNNNNNNNNNNNN |             |               | 1 |
| 2994        | MW320750.1   Severe acute respiratory syndrome coro |                    |                     |                       |                      | NNNNNNNNNNNNNNNNNNNNNN |                        |             |               | 1 |
| 3009        | MW320771.1   Severe acute respiratory syndrome coro |                    |                     |                       |                      | N                      | NNNN                   |             |               | 1 |
| 3054        | MW320864.1   Severe acute respiratory syndrome coro |                    | R                   |                       |                      | N                      | NNNN                   |             |               | 1 |
| 3066        | MW320881.1   Severe acute respiratory syndrome coro |                    |                     |                       |                      | NNNNNNNNNNNNNNNNNNNNNN |                        |             |               | 1 |
| 3069        | MW320887.1   Severe acute respiratory syndrome coro |                    |                     |                       |                      | NNNNNNNNNNNNNNNNNNNNNN |                        |             |               | 1 |
| 3072        | MW320891.1   Severe acute respiratory syndrome coro |                    |                     |                       |                      | NNNNNNNNNNNNNNNNNNNNNN |                        |             |               | 1 |
| 3082        | MW320908.1   Severe acute respiratory syndrome coro |                    |                     |                       |                      | NNNNNNNNNNNNNNNNNNNNNN |                        |             |               | 1 |
| 3085        | MW320913.1   Severe acute respiratory syndrome coro |                    |                     |                       |                      | NNNNNNNNNNNN           | NNNN                   |             |               | 1 |
| 3090        | MW320926.1   Severe acute respiratory syndrome coro |                    |                     |                       |                      | NNNNNNNNNNNNNNNNNNNNNN | NN                     |             |               | 1 |
| 3093        | MW320930.1   Severe acute respiratory syndrome coro |                    |                     |                       |                      | NNNNNNNNNNNNNNNNNNNNNN | NNNNNNNNNN             |             |               | 1 |
| 3094        | MW320931.1   Severe acute respiratory syndrome coro |                    |                     |                       |                      | NNNNNNNNNNNNNNNNNNNNNN | NNNNNNNN               |             |               | 1 |
| 3097        | MW320936.1   Severe acute respiratory syndrome coro |                    |                     |                       |                      | NNNNNNNNNNNNNNNNNNNNNN |                        |             |               | 1 |
| 3108        | MW320955.1   Severe acute respiratory syndrome coro |                    | A                   |                       |                      | NNNNNNNNNNNNNNNNNNNNNN | N                      |             |               | 1 |
| 3111        | MW320965.1   Severe acute respiratory syndrome coro |                    |                     |                       |                      | NNNNNNNNNNNNNNNNNNNNNN |                        |             |               | 1 |
| 3113        | MW320967.1   Severe acute respiratory syndrome coro |                    |                     |                       |                      | NNNNNNNNNNNNNNNNNNNNNN |                        |             |               | 1 |
| 3121        | MW320977.1   Severe acute respiratory syndrome coro |                    |                     |                       |                      | NNNNNNNNNNNNNN         |                        |             |               | 1 |
| 3133        | MW320994.1   Severe acute respiratory syndrome coro |                    |                     |                       |                      | NNNNNNNNNNNNNNNNNNNNNN | S                      |             |               | 1 |
| 3137        | MW321002.1   Severe acute respiratory syndrome coro |                    |                     |                       |                      | NNNNNNNNNNNNNNNNNNNNNN |                        |             |               | 1 |
| 3152        | MW321037.1   Severe acute respiratory syndrome coro |                    |                     |                       |                      | NNNNNNNN               |                        |             |               | 1 |
| 3153        | MW321040.1   Severe acute respiratory syndrome coro |                    |                     |                       |                      | NNNN                   |                        |             |               | 1 |
| 3157        | MW321045.1   Severe acute respiratory syndrome coro |                    |                     |                       |                      | NNNNNNNNNNNNNNNNNNNNNN | NNNNNNNNNN             |             |               | 1 |
| 3160        | MW321049.1   Severe acute respiratory syndrome coro |                    |                     |                       |                      |                        | NNNNNNNNNNNNNNNNNNNNNN |             |               | 1 |
| 3172        | MW321065.1   Severe acute respiratory syndrome coro |                    |                     |                       |                      | NNNNNNNNNNNNNNNNNNNNNN |                        |             |               | 1 |
| 3178        | MW321072.1   Severe acute respiratory syndrome coro |                    |                     |                       |                      | NNNNNNNNNNNNNNNNNNNNNN |                        |             |               | 1 |
| 3179        | MW321079.1   Severe acute respiratory syndrome coro |                    |                     |                       |                      | NNNNNNNNNNNNNNNNNNNNNN | NNNNNN                 | NNNN        |               | 1 |
| 3185        | MW321087.1   Severe acute respiratory syndrome coro |                    |                     |                       |                      | NNNNNNNNNNNNNNNNNNNNNN |                        |             |               | 1 |
| 3188        | MW321092.1   Severe acute respiratory syndrome coro |                    |                     |                       |                      | NNNNNNNNNNNNNNNNNNNNNN |                        |             |               | 1 |
| 3190        | MW321095.1   Severe acute respiratory syndrome coro |                    |                     |                       |                      | NNNNNNNNNNNNNNNNNNNNNN | NNNNNNNNNNNNNNNNNNNNNN |             |               | 1 |
| 3197        | MW321110.1   Severe acute respiratory syndrome coro |                    |                     |                       |                      | NNNNNNNNNNNNNNNNNNNNNN | NNNN                   | NNNNNN      |               | 1 |
| 3204        | MW321118.1   Severe acute respiratory syndrome coro |                    |                     |                       |                      | NNNNNNNNNNNNNNNNNNNNNN |                        |             |               | 1 |
| 3221        | MW321149.1   Severe acute respiratory syndrome coro |                    |                     |                       |                      | NNNNNNNNNN             |                        |             |               | 1 |
| 3225        | MW321158.1   Severe acute respiratory syndrome coro |                    |                     |                       |                      | NNNNNNNNNNNNNNNNNNNNNN |                        |             |               | 1 |
| 3232        | MW321172.1   Severe acute respiratory syndrome coro |                    |                     |                       |                      | NNNNNNNNNNNNNNNNNNNNNN |                        |             |               | 1 |
| 3255        | MW321218.1   Severe acute respiratory syndrome coro |                    |                     |                       |                      | NNNNNN                 |                        |             |               | 1 |
| 3270        | MW321248.1   Severe acute respiratory syndrome coro |                    |                     |                       |                      | NNNNNNNNNNNNNNNNNNNNNN |                        |             |               | 1 |
| 3274        | MW321253.1   Severe acute respiratory syndrome coro |                    |                     |                       |                      | NNNNNNNNNNNNNNNNNNNNNN | NNNNNNNNNNNNNNNNNNNNNN |             |               | 1 |
| 3275        | MW321257.1   Severe acute respiratory syndrome coro |                    |                     |                       |                      | NNNNNNNNNNNNNNNNNNNNNN |                        |             |               | 1 |
| 3276        | MW321258.1   Severe acute respiratory syndrome coro |                    |                     |                       |                      |                        | NNNNNNNNNNNNNNNNNNNNNN |             |               | 1 |
| 3286        | MW321274.1   Severe acute respiratory syndrome coro |                    |                     |                       |                      | NNNNNNNNNNNNNNNNNNNNNN | NNNN                   |             |               | 1 |
| 3289        | MW321277.1   Severe acute respiratory syndrome coro |                    |                     |                       |                      | NNNNNNNNNNNNNNNNNNNNNN |                        |             |               | 1 |
| 3291        | MW321280.1   Severe acute respiratory syndrome coro |                    |                     |                       |                      | NNNNNNNNNNNNNNNNNNNNNN |                        |             |               | 1 |
| 3294        | MW321284.1   Severe acute respiratory syndrome coro |                    |                     |                       |                      | NNNNNNNNNNNNNNNNNNNNNN |                        |             |               | 1 |
| 3300        | MW321296.1   Severe acute respiratory syndrome coro |                    |                     |                       |                      | NNNNNNNNNNNNNNNNNNNNNN |                        |             |               | 1 |
| 3305        | MW321310.1   Severe acute respiratory syndrome coro |                    |                     |                       |                      | NNNN                   |                        |             |               | 1 |
| 3312        | MW321328.1   Severe acute respiratory syndrome coro |                    |                     |                       |                      |                        | NNNNNNNNNNNNNNNNNNNNNN |             |               | 1 |
| 3317        | MW321342.1   Severe acute respiratory syndrome coro |                    |                     |                       |                      |                        | NNNN                   |             |               | 1 |
| 3326        | MW321364.1   Severe acute respiratory syndrome coro |                    |                     |                       |                      | NNNNNNNNNNNNNNNNNNNNNN |                        |             |               | 1 |
| 3327        | MW321366.1   Severe acute respiratory syndrome coro |                    |                     |                       |                      | NNNNNNNNNNNNNNNNNNNNNN |                        |             |               | 1 |
| 3334        | MW321376.1   Severe acute respiratory syndrome coro |                    |                     |                       |                      | NNNNNNNN               | NNNNNNNNNNNNNNNNNNNNNN |             |               | 1 |
| 3352        | MW321413.1   Severe acute respiratory syndrome coro |                    |                     |                       |                      | NNNNNNNNNNNNNNNNNNNNNN |                        |             |               | 1 |
| 3353        | MW321414.1   Severe acute respiratory syndrome coro |                    |                     |                       |                      |                        | NNNN                   |             |               | 1 |
| 3360        | MW321428.1   Severe acute respiratory syndrome coro |                    |                     |                       |                      | NNNNNNNNNNNNNNNNNNNNNN |                        |             |               | 1 |
| 3363        | MW321432.1   Severe acute respiratory syndrome coro |                    |                     |                       |                      | NNNNNNNN               |                        |             |               | 1 |
| 3403        | MW309478.1   Severe acute respiratory syndrome coro |                    |                     |                       |                      | NNNNNNNNNNNNNNNNNNNNNN |                        |             |               | 1 |
| 3404        | MW309481.1   Severe acute respiratory syndrome coro |                    |                     |                       |                      | NNNNNNNNNNNNNNNNNNNNNN | NNNNNN                 | NNNNNN      | NN            | 1 |
| 3406        | MW309483.1   Severe acute respiratory syndrome coro |                    |                     |                       |                      | NNNNNNNNNNNN           |                        |             |               | 1 |
| 3408        | MW309487.1   Severe acute respiratory syndrome coro |                    |                     |                       |                      | NNNNNNNNNNNNNNNNNNNNNN |                        |             |               | 1 |
