# Supplementary material for: Development and Implementation of a scalable and versatile test for COVID-19 diagnostics in rural communities
Source: bioRxiv or medRxiv preprint supplement (doi:10.1101/2021.03.01.21252679), 2021-03-08
Supplement: Supplementary file [file media-17.pdf]

Positives

| A         | B                 | C     | D             | E               | F     | G             | H               | I     | J             | K               | L     | M             |
|-----------|-------------------|-------|---------------|-----------------|-------|---------------|-----------------|-------|---------------|-----------------|-------|---------------|
|           | Ct <sub>RPP</sub> |       |               | Ct <sub>N</sub> |       |               | Ct <sub>E</sub> |       |               | Ct <sub>S</sub> |       |               |
| Pool name | Individual        | Pool  | Ct difference | Individual      | Pool  | Ct difference | Individual      | Pool  | Ct difference | Individual      | Pool  | Ct difference |
| 1P        | 29.62             | 29.94 | 0.32          | 13.39           | 14.52 | 1.13          | 14.94           | 16.19 | 1.24          | 15.31           | 16.66 | 1.34          |
| 2P        | 30.67             | 30.12 | -0.55         | 17.24           | 18.21 | 0.97          | 17.99           | 19.05 | 1.06          | 17.77           | 18.82 | 1.05          |
| 3P        | 30.61             | 30.86 | 0.25          | 18.55           | 21.31 | 2.76          | 20.04           | 23.07 | 3.03          | 20.17           | 23.23 | 3.06          |
| 4P        | 31.02             | 30.11 | -0.90         | 22.28           | 22.92 | 0.65          | 22.27           | 23.08 | 0.81          | 22.07           | 22.91 | 0.84          |
| 5P        | 31.22             | 31.23 | 0.01          | 17.15           | 18.43 | 1.29          | 18.22           | 19.50 | 1.27          | 18.54           | 19.91 | 1.37          |
| 6P        | 29.15             | 29.85 | 0.70          | 17.18           | 18.07 | 0.89          | 18.54           | 19.24 | 0.70          | 18.88           | 19.56 | 0.68          |
| 7P        | 29.99             | 31.25 | 1.26          | 17.05           | 18.92 | 1.87          | 19.17           | 20.93 | 1.76          | 19.53           | 21.63 | 2.10          |
| 8P        | 32.00             | 31.16 | -0.84         | 22.00           | 22.81 | 0.81          | 23.00           | 24.44 | 1.44          | 23.30           | 24.68 | 1.38          |
| 9P        | 29.13             | 29.81 | 0.68          | 16.78           | 17.82 | 1.04          | 18.44           | 19.52 | 1.08          | 19.05           | 20.00 | 0.96          |
| 10P       | 29.02             | 28.40 | -0.63         | 24.75           | 23.86 | -0.89         | 25.29           | 24.85 | -0.44         | 25.51           | 25.31 | -0.20         |
| 11P       | 30.89             | 29.84 | -1.05         | 15.28           | 15.23 | -0.06         | 17.27           | 17.08 | -0.20         | 17.78           | 17.49 | -0.30         |
| 12P       | 30.88             | 30.53 | -0.35         | 17.33           | 16.46 | -0.87         | 18.76           | 17.89 | -0.88         | 19.30           | 18.58 | -0.71         |
| 13P       | 27.15             | 27.19 | 0.04          | 22.54           | 22.65 | 0.11          | 22.26           | 22.55 | 0.28          | 21.56           | 22.27 | 0.71          |
| 14P       | 31.85             | 31.05 | -0.80         | 15.96           | 16.85 | 0.90          | 17.44           | 18.43 | 1.00          | 17.86           | 19.18 | 1.32          |
| 15P       | 30.25             | 30.34 | 0.08          | 15.27           | 16.42 | 1.16          | 16.31           | 18.03 | 1.72          | 16.54           | 18.30 | 1.76          |
| 16P       | 31.57             | 30.95 | -0.62         | 20.15           | 19.36 | -0.79         | 21.46           | 20.91 | -0.55         | 22.22           | 21.34 | -0.88         |
| 17P       | 29.94             | 29.95 | 0.02          | 20.48           | 20.58 | 0.10          | 21.76           | 22.05 | 0.29          | 22.11           | 22.22 | 0.11          |
| 18P       | 30.03             | 30.35 | 0.33          | 17.27           | 18.37 | 1.10          | 18.81           | 20.15 | 1.34          | 19.38           | 20.58 | 1.20          |
| 19P       | 29.23             | 30.37 | 1.14          | 16.83           | 17.99 | 1.15          | 17.94           | 19.47 | 1.54          | 17.89           | 19.71 | 1.82          |
| 20P       | 30.28             | 30.39 | 0.10          | 19.54           | 20.47 | 0.93          | 20.68           | 21.37 | 0.69          | 20.97           | 21.57 | 0.60          |
| 21P       | 31.28             | 29.13 | -2.16         | 16.16           | 17.74 | 1.58          | 17.94           | 19.55 | 1.61          | 18.29           | 19.75 | 1.47          |
| 22P       | 30.00             | 30.81 | 0.81          | 29.20           | 29.40 | 0.20          | 28.80           | 29.74 | 0.94          | 29.00           | 29.99 | 0.99          |

Regression

| A         | B               | C     | D               | E     | F               | G     |
|-----------|-----------------|-------|-----------------|-------|-----------------|-------|
|           | Ct <sub>N</sub> |       | Ct <sub>E</sub> |       | Ct <sub>S</sub> |       |
| Pool name | Individual      | Pool  | Individual      | Pool  | Individual      | Pool  |
| 1P        | 13.39           | 14.52 | 14.94           | 16.19 | 15.31           | 16.66 |
| 2P        | 17.24           | 18.21 | 17.99           | 19.05 | 17.77           | 18.82 |
| 3P        | 18.55           | 21.31 | 20.04           | 23.07 | 20.17           | 23.23 |
| 4P        | 22.28           | 22.92 | 22.27           | 23.08 | 22.07           | 22.91 |
| 5P        | 17.15           | 18.43 | 18.22           | 19.50 | 18.54           | 19.91 |
| 6P        | 17.18           | 18.07 | 18.54           | 19.24 | 18.88           | 19.56 |
| 7P        | 17.05           | 18.92 | 19.17           | 20.93 | 19.53           | 21.63 |
| 8P        | 22.00           | 22.81 | 23.00           | 24.44 | 23.30           | 24.68 |
| 9P        | 16.78           | 17.82 | 18.44           | 19.52 | 19.05           | 20.00 |
| 10P       | 24.75           | 23.86 | 25.29           | 24.85 | 25.51           | 25.31 |
| 11P       | 15.28           | 15.23 | 17.27           | 17.08 | 17.78           | 17.49 |
| 12P       | 17.33           | 16.46 | 18.76           | 17.89 | 19.30           | 18.58 |
| 13P       | 22.54           | 22.65 | 22.26           | 22.55 | 21.56           | 22.27 |
| 14P       | 15.96           | 16.85 | 17.44           | 18.43 | 17.86           | 19.18 |
| 15P       | 15.27           | 16.42 | 16.31           | 18.03 | 16.54           | 18.30 |
| 16P       | 20.15           | 19.36 | 21.46           | 20.91 | 22.22           | 21.34 |
| 17P       | 20.48           | 20.58 | 21.76           | 22.05 | 22.11           | 22.22 |
| 18P       | 17.27           | 18.37 | 18.81           | 20.15 | 19.38           | 20.58 |
| 19P       | 16.83           | 17.99 | 17.94           | 19.47 | 17.89           | 19.71 |
| 20P       | 19.54           | 20.47 | 20.68           | 21.37 | 20.97           | 21.57 |
| 21P       | 16.16           | 17.74 | 17.94           | 19.55 | 18.29           | 19.75 |
| 22P       | 29.20           | 29.40 | 28.80           | 29.74 | 29.00           | 29.99 |

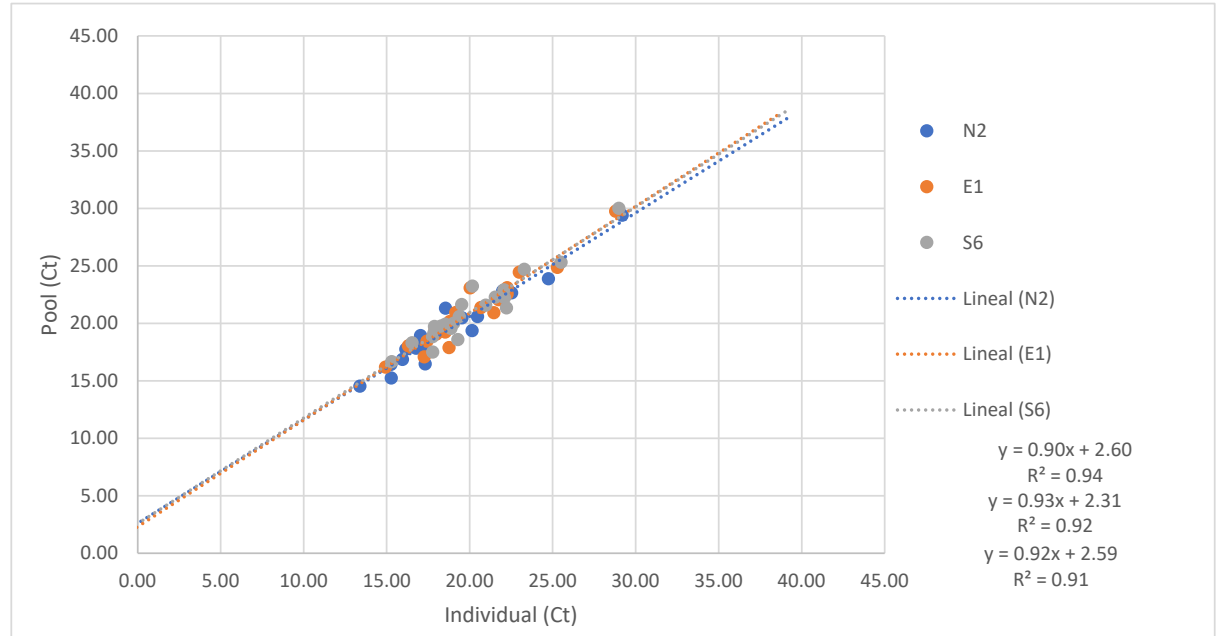

|   | LOD   | Pool       |           | LOD   | Individual |              |
|---|-------|------------|-----------|-------|------------|--------------|
|   |       | 95% CI low | 95% CI up |       | 95% CI low | 95% CI upper |
| N | 37.29 | 36.91      | 37.67     | 38.54 | 38.12      | 38.97        |
| E | 37.29 | 36.91      | 37.67     | 37.61 | 37.20      | 38.02        |
| S | 37.29 | 36.91      | 37.67     | 37.72 | 37.30      | 38.13        |

For a pool which is at the limit of detection, the individual sample would have had a Ct around 38.54 for N2 based on the regression analysis. Near the limit of detection, the regression analysis indicated this slight increase in Ct due to pooling when

n=2, this is likely due to little change in Cts due to pooling two samples.
