# Supplementary material for: Development and Implementation of a scalable and versatile test for COVID-19 diagnostics in rural communities
Source: bioRxiv or medRxiv preprint supplement (doi:10.1101/2021.03.01.21252679), 2021-03-08
Supplement: Supplementary file [file media-18.pdf]

Pool raw data

| B         | C                  | D            | E      | F     | G               | H     | I     | J        | K         | L            | M                  | N            | O      | P     | Q               | R     | S     | T        | U         | V            | W                  | X            | Y      | Z     | AA              | AB    | AC    | AD       | AE        | AF           | AG        | AH           | AI     | AJ    | AK              | AL    | AM    | AN       | AO        | AP           |       |       |
|-----------|--------------------|--------------|--------|-------|-----------------|-------|-------|----------|-----------|--------------|--------------------|--------------|--------|-------|-----------------|-------|-------|----------|-----------|--------------|--------------------|--------------|--------|-------|-----------------|-------|-------|----------|-----------|--------------|-----------|--------------|--------|-------|-----------------|-------|-------|----------|-----------|--------------|-------|-------|
| Pool name | Original test date | Plate number | Sample | Claw  | Cl <sub>2</sub> | CL    | CL    | Result   | cut-off N | cut-off 9990 | Original test date | Plate number | Sample | Claw  | Cl <sub>2</sub> | CL    | CL    | Result   | cut-off N | cut-off 9990 | Original test date | Plate number | Sample | Claw  | Cl <sub>2</sub> | CL    | CL    | Result   | cut-off N | cut-off 9990 | Test date | Plate number | Sample | Claw  | Cl <sub>2</sub> | CL    | CL    | Result   | cut-off N | cut-off 9990 |       |       |
| 1N        |                    |              |        | 29.40 | 40.66           | N/A   | N/A   | Negative | 35.59     | 34.67        |                    |              |        | 28.76 | 37.60           | N/A   | N/A   | Negative | 35.81     | 35.08        |                    |              |        | 28.98 | N/A             | N/A   | N/A   | Negative | 35.81     | 35.08        |           |              |        | 29.40 | 37.25           | N/A   | N/A   | Negative | 36.08     | 35.95        |       |       |
| 2N        |                    |              |        | 29.02 | 40.24           | 37.58 | N/A   | Negative | 35.59     | 34.67        |                    |              |        | 29.04 | 38.01           | 42.29 | 39.06 | Negative | 35.81     | 35.08        |                    |              |        | 30.07 | N/A             | N/A   | 43.27 | 44.51    | Negative  | 35.81        | 35.08     |              |        |       | 29.66           | N/A   | N/A   | 42.87    | 42.20     | Negative     | 36.08 | 35.95 |
| 3N        |                    |              |        | 29.13 | N/A             | N/A   | N/A   | Negative | 35.59     | 34.67        |                    |              |        | 31.13 | N/A             | N/A   | N/A   | Negative | 35.81     | 35.08        |                    |              |        | 29.72 | N/A             | N/A   | N/A   | Negative | 35.81     | 35.08        |           |              |        | 29.64 | 37.33           | N/A   | N/A   | 36.76    | Negative  | 36.08        | 35.95 |       |
| 4N        |                    |              |        | 31.06 | N/A             | N/A   | N/A   | Negative | 35.59     | 34.67        |                    |              |        | 30.86 | N/A             | N/A   | 42.50 | N/A      | Negative  | 35.81        | 35.08              |              |        |       | 29.47           | 41.01 | N/A   | N/A      | Negative  | 35.81        | 35.08     |              |        |       | 30.95           | N/A   | N/A   | 44.93    | 44.80     | Negative     | 36.08 | 35.95 |
| 5N        |                    |              |        | 30.59 | N/A             | N/A   | N/A   | Negative | 35.59     | 34.67        |                    |              |        | 30.76 | N/A             | N/A   | N/A   | 38.68    | Negative  | 35.81        | 35.08              |              |        |       | 29.38           | N/A   | N/A   | N/A      | Negative  | 35.81        | 35.08     |              |        |       | 29.65           | 37.90 | N/A   | N/A      | N/A       | Negative     | 36.08 | 35.95 |
| 6N        |                    |              |        | 28.84 | N/A             | N/A   | N/A   | Negative | 35.59     | 34.67        |                    |              |        | 31.01 | N/A             | N/A   | N/A   | N/A      | Negative  | 35.81        | 35.08              |              |        |       | 29.99           | 41.86 | N/A   | N/A      | Negative  | 35.81        | 35.08     |              |        |       | 30.67           | N/A   | N/A   | N/A      | Negative  | 36.08        | 35.95 |       |
| 7N        |                    |              |        | 30.09 | N/A             | N/A   | N/A   | Negative | 35.59     | 34.67        |                    |              |        | 29.25 | N/A             | N/A   | N/A   | N/A      | Negative  | 35.81        | 35.08              |              |        |       | 29.25           | N/A   | N/A   | N/A      | Negative  | 35.81        | 35.08     |              |        |       | 31.04           | 37.52 | N/A   | N/A      | N/A       | Negative     | 36.08 | 35.95 |
| 8N        |                    |              |        | 29.50 | N/A             | N/A   | N/A   | Negative | 35.59     | 34.67        |                    |              |        | 30.12 | N/A             | N/A   | N/A   | N/A      | Negative  | 35.81        | 35.08              |              |        |       | 29.48           | N/A   | N/A   | N/A      | Negative  | 35.81        | 35.08     |              |        |       | 29.84           | 36.22 | N/A   | N/A      | 38.27     | Negative     | 36.08 | 35.95 |
| 9N        |                    |              |        | 30.05 | N/A             | N/A   | N/A   | Negative | 35.59     | 34.67        |                    |              |        | 31.92 | N/A             | N/A   | N/A   | N/A      | Negative  | 35.81        | 35.08              |              |        |       | 29.22           | N/A   | N/A   | N/A      | Negative  | 35.81        | 35.08     |              |        |       | 29.79           | N/A   | N/A   | N/A      | Negative  | 36.10        | 34.84 |       |
| 10N       |                    |              |        | 29.97 | N/A             | N/A   | N/A   | Negative | 35.59     | 34.67        |                    |              |        | 31.13 | N/A             | N/A   | N/A   | N/A      | Negative  | 35.81        | 35.08              |              |        |       | 29.72           | N/A   | N/A   | N/A      | Negative  | 35.59        | 34.67     |              |        |       | 31.14           | N/A   | N/A   | N/A      | Negative  | 36.10        | 34.84 |       |
| 11N       |                    |              |        | 29.37 | N/A             | N/A   | 43.88 | Negative | 35.60     | 35.06        |                    |              |        | 30.20 | N/A             | N/A   | N/A   | N/A      | Negative  | 35.60        | 35.06              |              |        |       | 31.13           | N/A   | N/A   | N/A      | Negative  | 35.60        | 35.06     |              |        |       | 29.83           | N/A   | N/A   | N/A      | 40.28     | Negative     | 36.15 | 35.56 |
| 12N       |                    |              |        | 29.96 | N/A             | N/A   | N/A   | Negative | 35.60     | 35.06        |                    |              |        | 30.01 | 40.05           | N/A   | N/A   | N/A      | Negative  | 35.60        | 35.06              |              |        |       | 29.75           | N/A   | N/A   | N/A      | Negative  | 35.60        | 35.06     |              |        |       | 29.48           | N/A   | N/A   | N/A      | Negative  | 36.15        | 35.56 |       |
| 13N       |                    |              |        | 31.63 | N/A             | N/A   | N/A   | Negative | 35.60     | 35.06        |                    |              |        | 30.16 | N/A             | N/A   | N/A   | N/A      | Negative  | 35.60        | 35.06              |              |        |       | 30.14           | N/A   | N/A   | N/A      | Negative  | 35.60        | 35.06     |              |        |       | 30.46           | N/A   | N/A   | N/A      | Negative  | 36.15        | 35.56 |       |
| 14N       |                    |              |        | 29.81 | N/A             | N/A   | N/A   | Negative | 35.60     | 35.06        |                    |              |        | 30.22 | N/A             | N/A   | N/A   | N/A      | Negative  | 35.60        | 35.06              |              |        |       | 30.18           | 44.99 | N/A   | N/A      | Negative  | 35.60        | 35.06     |              |        |       | 30.11           | N/A   | N/A   | N/A      | Negative  | 36.15        | 35.56 |       |
| 15N       |                    |              |        | 29.87 | N/A             | N/A   | N/A   | Negative | 35.60     | 35.06        |                    |              |        | 29.46 | N/A             | N/A   | 37.69 | N/A      | Negative  | 35.60        | 35.06              |              |        |       | 28.86           | N/A   | N/A   | 40.91    | Negative  | 35.60        | 35.06     |              |        |       | 29.32           | N/A   | N/A   | N/A      | Negative  | 36.15        | 35.56 |       |
| 16N       |                    |              |        | 29.23 | N/A             | N/A   | N/A   | Negative | 35.60     | 35.06        |                    |              |        | 26.20 | N/A             | N/A   | 43.98 | N/A      | Negative  | 35.60        | 35.06              |              |        |       | 30.26           | N/A   | N/A   | N/A      | Negative  | 35.60        | 35.06     |              |        |       | 29.88           | N/A   | N/A   | N/A      | Negative  | 36.15        | 35.56 |       |
| 17N       |                    |              |        | 29.97 | N/A             | N/A   | N/A   | Negative | 35.60     | 35.06        |                    |              |        | 30.48 | 36.31           | N/A   | N/A   | N/A      | Negative  | 35.60        | 35.06              |              |        |       | 30.37           | N/A   | N/A   | 40.47    | Negative  | 35.60        | 35.06     |              |        |       | 29.78           | N/A   | N/A   | N/A      | Negative  | 36.15        | 35.56 |       |
| 18N       |                    |              |        | 30.02 | N/A             | N/A   | N/A   | Negative | 35.60     | 35.06        |                    |              |        | 29.88 | N/A             | N/A   | N/A   | N/A      | Negative  | 35.60        | 35.06              |              |        |       | 29.55           | N/A   | N/A   | N/A      | Negative  | 35.60        | 35.06     |              |        |       | 29.60           | N/A   | N/A   | N/A      | Negative  | 36.15        | 35.56 |       |
| 19N       |                    |              |        | 29.86 | N/A             | N/A   | N/A   | Negative | 35.60     | 35.06        |                    |              |        | 29.63 | N/A             | N/A   | N/A   | N/A      | Negative  | 35.60        | 35.06              |              |        |       | 30.03           | N/A   | N/A   | N/A      | Negative  | 35.52        | 34.96     |              |        |       | 30.03           | N/A   | N/A   | N/A      | Negative  | 36.15        | 35.56 |       |
| 20N       |                    |              |        | 29.95 | N/A             | N/A   | N/A   | Negative | 35.60     | 35.06        |                    |              |        | 30.24 | 38.69           | N/A   | N/A   | N/A      | Negative  | 35.60        | 35.06              |              |        |       | 32.18           | N/A   | N/A   | N/A      | Negative  | 35.52        | 34.96     |              |        |       | 30.12           | N/A   | N/A   | N/A      | Negative  | 36.15        | 35.56 |       |
| 1P        |                    |              |        | 29.62 | 13.29           | 14.94 | 15.31 | Positive | 35.87     | 36.67        |                    |              |        | 29.20 | N/A             | N/A   | N/A   | N/A      | Negative  | 35.81        | 35.08              |              |        |       | 34.10           | N/A   | N/A   | N/A      | Negative  | 35.81        | 35.08     |              |        |       | 29.66           | 15.21 | 16.69 | 16.89    | Positive  | 36.08        | 35.95 |       |
| 2P        |                    |              |        | 30.67 | 17.24           | 17.69 | 17.77 | Positive | 35.87     | 36.62        |                    |              |        | 28.06 | N/A             | N/A   | N/A   | N/A      | Negative  | 35.81        | 35.08              |              |        |       | 33.04           | N/A   | N/A   | N/A      | Negative  | 35.81        | 35.08     |              |        |       | 29.63           | 18.22 | 18.52 | 18.65    | Positive  | 36.08        | 35.95 |       |
| 3P        |                    |              |        | 30.61 | 18.55           | 20.04 | 20.17 | Positive | 35.87     | 36.62        |                    |              |        | 29.21 | N/A             | N/A   | 44.93 | N/A      | Negative  | 35.81        | 35.08              |              |        |       | 29.10           | N/A   | N/A   | N/A      | Negative  | 35.81        | 35.08     |              |        |       | 31.34           | 21.62 | 22.81 | 23.21    | Positive  | 36.08        | 35.95 |       |
| 4P        |                    |              |        | 31.02 | 22.28           | 22.27 | 22.07 | Positive | 36.09     | 35.73        |                    |              |        | 29.94 | N/A             | N/A   | N/A   | N/A      | Negative  | 35.81        | 35.08              |              |        |       | 29.38           | N/A   | N/A   | N/A      | Negative  | 35.81        | 35.08     |              |        |       | 31.78           | 23.63 | 23.67 | 23.57    | Positive  | 36.08        | 35.95 |       |
| 5P        |                    |              |        | 31.22 | 17.15           | 18.22 | 18.54 | Positive | 36.09     | 35.73        |                    |              |        | 28.76 | 37.60           | N/A   | N/A   | N/A      | Negative  | 35.81        | 35.08              |              |        |       | 28.98           | N/A   | N/A   | N/A      | Negative  | 35.81        | 35.08     |              |        |       | 30.01           | 18.84 | 19.88 | 20.23    | Positive  | 36.08        | 35.95 |       |
| 6P        |                    |              |        | 29.15 | 17.18           | 18.54 | 18.88 | Positive | 36.09     | 35.73        |                    |              |        | 29.04 | 38.01           | 42.29 | 39.06 | Negative | 35.81     | 35.08        |                    |              |        | 30.07 | N/A             | 43.27 | 44.51 | Negative | 35.81     | 35.08        |           |              |        | 29.64 | 18.71           | 19.63 | 20.10 | Positive | 36.08     | 35.95        |       |       |
| 7P        |                    |              |        | 29.90 | 17.05           | 18.17 | 18.53 | Positive | 35.97     | 36.32        |                    |              |        | 30.11 | N/A             | N/A   | N/A   | N/A      | Negative  | 35.81        | 35.08              |              |        |       | 28.95           | N/A   | N/A   | N/A      | Negative  | 35.81        | 35.08     |              |        |       | 30.74           | 18.52 | 20.06 | 20.94    | Positive  | 36.08        | 35.95 |       |
| 8P        |                    |              |        | 32.00 | 22.00           | 23.00 | 23.30 | Positive | 35.47     | 36.52        |                    |              |        | 29.05 | N/A             | N/A   | 41.95 | N/A      | Negative  | 35.81        | 35.08              |              |        |       | 28.93           | N/A   | N/A   | 44.70    | Negative  | 35.81        | 35.08     |              |        |       | 30.63           | 23.69 | 24.80 | 25.28    | Positive  | 36.08        | 35.95 |       |
| 9P        |                    |              |        | 29.13 | 16.78           | 18.44 | 19.05 | Positive | 36.14     | 36.22        |                    |              |        | 29.36 | N/A             | N/A   | N/A   | N/A      | Negative  | 35.81        | 35.08              |              |        |       | 30.07           | 43.32 | N/A   | N/A      | Negative  | 35.81        | 35.08     |              |        |       | 29.30           | 18.04 | 19.19 | 20.01    | Positive  | 36.08        | 35.95 |       |
| 10P       |                    |              |        | 29.02 | 24.75           | 25.29 | 25.51 | Positive | 35.53     | 35.84        |                    |              |        | 30.27 | N/A             | N/A   | N/A   | N/A      | Negative  | 35.81        | 35.08              |              |        |       | 29.38           | N/A   | N/A   | 38.52    | Negative  | 35.81        | 35.08     |              |        |       | 29.36           | 24.88 | 25.64 | 26.38    | Positive  | 36.08        | 35.95 |       |
| 11P       |                    |              |        | 30.89 | 15.28           | 17.27 | 17.78 | Positive | 35.88     | 34.58        |                    |              |        | 31.13 | N/A             | N/A   | N/A   | N/A      | Negative  | 35.81        | 35.08              |              |        |       | 29.72           | N/A   | N/A   | N/A      | Negative  | 35.81        | 35.08     |              |        |       | 30.88           | 16.00 | 17.49 | 18.67    | Positive  | 36.08        | 35.95 |       |
| 12P       |                    |              |        | 30.88 | 17.31           | 18.76 | 19.30 | Positive | 35.40     | 35.38        |                    |              |        | 31.13 | N/A             | N/A   | 41.61 | N/A      | Negative  | 35.81        | 35.08              |              |        |       | 28.55           | N/A   | 40.18 | 41.41    | Negative  | 35.81        | 35.08     |              |        |       | 31.38           | 17.91 | 19.03 | 19.69    | Positive  | 36.08        | 35.95 |       |
| 13P       |                    |              |        | 27.15 | 22.54           | 22.26 | 21.56 | Positive | 35.40     | 35.38        |                    |              |        | 30.86 | N/A             | 42.50 | N/A   | N/A      | Negative  | 35.81        | 35.08              |              |        |       | 29.47           | 41.01 | N/A   | N/A      | Negative  | 35.81        | 35.08     |              |        |       | 28.31           | 23.54 | 23.50 | 23.32    | Positive  | 36.08        | 35.95 |       |
| 14P       |                    |              |        | 31.85 | 15.86           | 17.44 | 17.86 | Positive | 35.40     | 35.38        |                    |              |        | 30.76 | N/A             | N/A   | 38.68 | N/A      | Negative  | 35.81        | 35.08              |              |        |       | 29.38           | N/A   | N/A   | N/A      | Negative  | 35.81        | 35.08     |              |        |       | 30.42           | 16.65 | 17.69 | 17.86    | Positive  | 36.08        | 35.95 |       |
| 15P       |                    |              |        | 30.25 | 15.27           | 16.31 | 16.54 | Positive | 35.40     | 35.38        |                    |              |        | 31.01 | N/A             | N/A   | N/A   | N/A      | Negative  | 35.81        | 35.08              |              |        |       | 28.99           | 41.86 | N/A   | N/A      | Negative  | 35.81        | 35.08     |              |        |       | 30.23           | 17.07 | 18.10 | 18.75    | Positive  | 36.08        | 35.95 |       |
| 16P       |                    |              |        | 31.57 | 20.15           | 21.46 | 22.22 | Positive | 35.40     | 35.38        |                    |              |        | 31.47 | N/A             | N/A   | N/A   | N/A      | Negative  | 35.81        | 35.08              |              |        |       | 29.25           | N/A   | N/A   | N/A      | Negative  | 35.81        | 35.08     |              |        |       | 31.58           | 20.74 | 22.05 | 22.97    | Positive  | 36.08        | 35.95 |       |
| 17P       |                    |              |        | 29.94 | 20.48           | 21.76 | 22.11 | Positive | 35.40     | 35.38        |                    |              |        | 30.12 | N/A             | N/A   | N/A   | N/A      | Negative  | 35.81        | 35.08              |              |        |       | 30.17           | 21.70 | 22.80 | 23.48    | Positive  | 35.81        | 35.08     |              |        |       | 30.17           | 21.70 | 22.80 | 23.48    | Positive  | 36.08        | 35.95 |       |
| 18P       |                    |              |        | 30.03 | 17.27           | 18.81 | 19.38 | Positive | 35.40     | 35.38        |                    |              |        | 31.92 | N/A             | N/A   | N/A   | N/A      | Negative  | 35.81        | 35.08              |              |        |       | 29.22           | N/A   | N/A   | N/A      | Negative  | 35.81        | 35.08     |              |        |       | 30.09           | 17.77 | 19.30 | 20.21    | Positive  | 36.08        | 35.95 |       |
| 19P       |                    |              |        | 29.23 | 16.83           | 17.94 | 17.89 | Positive | 35.40     | 35.38        |                    |              |        | 31.07 | N/A             | N/A   | N/A   | N/A      | Negative  | 35.81        | 35.08              |              |        |       | 29.46           | N/A   | N/A   | N/A      | Negative  | 35.59        |           |              |        |       |                 |       |       |          |           |              |       |       |

**Positives**

| A         | B                 | C     | D             | E               | F     | G             | H               | I     | J             | K               | L     | M             |
|-----------|-------------------|-------|---------------|-----------------|-------|---------------|-----------------|-------|---------------|-----------------|-------|---------------|
|           | Ct <sub>RPP</sub> |       |               | Ct <sub>N</sub> |       |               | Ct <sub>E</sub> |       |               | Ct <sub>S</sub> |       |               |
| Pool name | Individual        | Pool  | Ct difference | Individual      | Pool  | Ct difference | Individual      | Pool  | Ct difference | Individual      | Pool  | Ct difference |
| 1P        | 29.62             | 29.66 | 0.04          | 13.39           | 15.21 | 1.81          | 14.94           | 16.09 | 1.14          | 15.31           | 16.89 | 1.58          |
| 2P        | 30.67             | 29.83 | -0.83         | 17.24           | 18.22 | 0.98          | 17.99           | 18.52 | 0.53          | 17.77           | 18.65 | 0.88          |
| 3P        | 30.61             | 31.34 | 0.73          | 18.55           | 21.62 | 3.07          | 20.04           | 22.81 | 2.77          | 20.17           | 23.21 | 3.04          |
| 4P        | 31.02             | 31.78 | 0.76          | 22.28           | 23.63 | 1.35          | 22.27           | 23.67 | 1.40          | 22.07           | 23.57 | 1.50          |
| 5P        | 31.22             | 30.01 | -1.21         | 17.15           | 18.84 | 1.69          | 18.22           | 19.88 | 1.66          | 18.54           | 20.23 | 1.69          |
| 6P        | 29.15             | 29.64 | 0.49          | 17.18           | 18.71 | 1.53          | 18.54           | 19.63 | 1.09          | 18.88           | 20.10 | 1.22          |
| 7P        | 29.99             | 30.74 | 0.75          | 17.05           | 18.52 | 1.47          | 19.17           | 20.06 | 0.89          | 19.53           | 20.94 | 1.42          |
| 8P        | 32.00             | 30.63 | -1.37         | 22.00           | 23.69 | 1.69          | 23.00           | 24.80 | 1.80          | 23.30           | 25.28 | 1.98          |
| 9P        | 29.13             | 29.30 | 0.17          | 16.78           | 18.04 | 1.26          | 18.44           | 19.19 | 0.75          | 19.05           | 20.01 | 0.96          |
| 10P       | 29.02             | 29.36 | 0.34          | 24.75           | 24.88 | 0.13          | 25.29           | 25.64 | 0.35          | 25.51           | 26.38 | 0.87          |
| 11P       | 30.89             | 30.88 | -0.01         | 15.28           | 16.00 | 0.71          | 17.27           | 17.49 | 0.22          | 17.78           | 18.67 | 0.89          |
| 12P       | 30.88             | 31.38 | 0.50          | 17.33           | 17.91 | 0.58          | 18.76           | 19.03 | 0.27          | 19.30           | 19.89 | 0.59          |
| 13P       | 27.15             | 28.31 | 1.16          | 22.54           | 23.54 | 1.00          | 22.26           | 23.50 | 1.24          | 21.56           | 23.32 | 1.76          |
| 14P       | 31.85             | 30.42 | -1.43         | 15.96           | 16.05 | 0.09          | 17.44           | 17.09 | -0.34         | 17.86           | 17.86 | 0.00          |
| 15P       | 30.25             | 30.23 | -0.02         | 15.27           | 17.07 | 1.80          | 16.31           | 18.10 | 1.79          | 16.54           | 18.75 | 2.21          |
| 16P       | 31.57             | 31.58 | 0.01          | 20.15           | 20.74 | 0.59          | 21.46           | 22.05 | 0.59          | 22.22           | 22.97 | 0.75          |
| 17P       | 29.94             | 30.17 | 0.24          | 20.48           | 21.70 | 1.21          | 21.76           | 22.80 | 1.04          | 22.11           | 23.48 | 1.37          |
| 18P       | 30.03             | 30.09 | 0.06          | 17.27           | 17.77 | 0.50          | 18.81           | 19.30 | 0.49          | 19.38           | 20.21 | 0.83          |
| 19P       | 29.23             | 30.47 | 1.24          | 16.83           | 17.97 | 1.13          | 17.94           | 19.10 | 1.16          | 17.89           | 19.44 | 1.55          |
| 20P       | 30.28             | 30.77 | 0.49          | 19.54           | 21.28 | 1.73          | 20.68           | 22.08 | 1.40          | 20.97           | 22.53 | 1.56          |
| 21P       | 31.28             | 31.06 | -0.23         | 16.16           | 18.31 | 2.15          | 17.94           | 20.25 | 2.31          | 18.29           | 20.70 | 2.42          |
| 22P       | 30.00             | 31.15 | 1.15          | 29.20           | 30.92 | 1.72          | 28.80           | 30.70 | 1.90          | 29.00           | 30.94 | 1.94          |

## Regression

| A         | B               | C     | D               | E     | F               | G     |
|-----------|-----------------|-------|-----------------|-------|-----------------|-------|
|           | Ct <sub>N</sub> |       | Ct <sub>E</sub> |       | Ct <sub>S</sub> |       |
| Pool name | Individual      | Pool  | Individual      | Pool  | Individual      | Pool  |
| 1P        | 13.39           | 15.21 | 14.94           | 16.09 | 15.31           | 16.89 |
| 2P        | 17.24           | 18.22 | 17.99           | 18.52 | 17.77           | 18.65 |
| 3P        | 18.55           | 21.62 | 20.04           | 22.81 | 20.17           | 23.21 |
| 4P        | 22.28           | 23.63 | 22.27           | 23.67 | 22.07           | 23.57 |
| 5P        | 17.15           | 18.84 | 18.22           | 19.88 | 18.54           | 20.23 |
| 6P        | 17.18           | 18.71 | 18.54           | 19.63 | 18.88           | 20.10 |
| 7P        | 17.05           | 18.52 | 19.17           | 20.06 | 19.53           | 20.94 |
| 8P        | 22.00           | 23.69 | 23.00           | 24.80 | 23.30           | 25.28 |
| 9P        | 16.78           | 18.04 | 18.44           | 19.19 | 19.05           | 20.01 |
| 10P       | 24.75           | 24.88 | 25.29           | 25.64 | 25.51           | 26.38 |
| 11P       | 15.28           | 16.00 | 17.27           | 17.49 | 17.78           | 18.67 |
| 12P       | 17.33           | 17.91 | 18.76           | 19.03 | 19.30           | 19.89 |
| 13P       | 22.54           | 23.54 | 22.26           | 23.50 | 21.56           | 23.32 |
| 14P       | 15.96           | 16.05 | 17.44           | 17.09 | 17.86           | 17.86 |
| 15P       | 15.27           | 17.07 | 16.31           | 18.10 | 16.54           | 18.75 |
| 16P       | 20.15           | 20.74 | 21.46           | 22.05 | 22.22           | 22.97 |
| 17P       | 20.48           | 21.70 | 21.76           | 22.80 | 22.11           | 23.48 |
| 18P       | 17.27           | 17.77 | 18.81           | 19.30 | 19.38           | 20.21 |
| 19P       | 16.83           | 17.97 | 17.94           | 19.10 | 17.89           | 19.44 |
| 20P       | 19.54           | 21.28 | 20.68           | 22.08 | 20.97           | 22.53 |
| 21P       | 16.16           | 18.31 | 17.94           | 20.25 | 18.29           | 20.70 |
| 22P       | 29.20           | 30.92 | 28.80           | 30.70 | 29.00           | 30.94 |

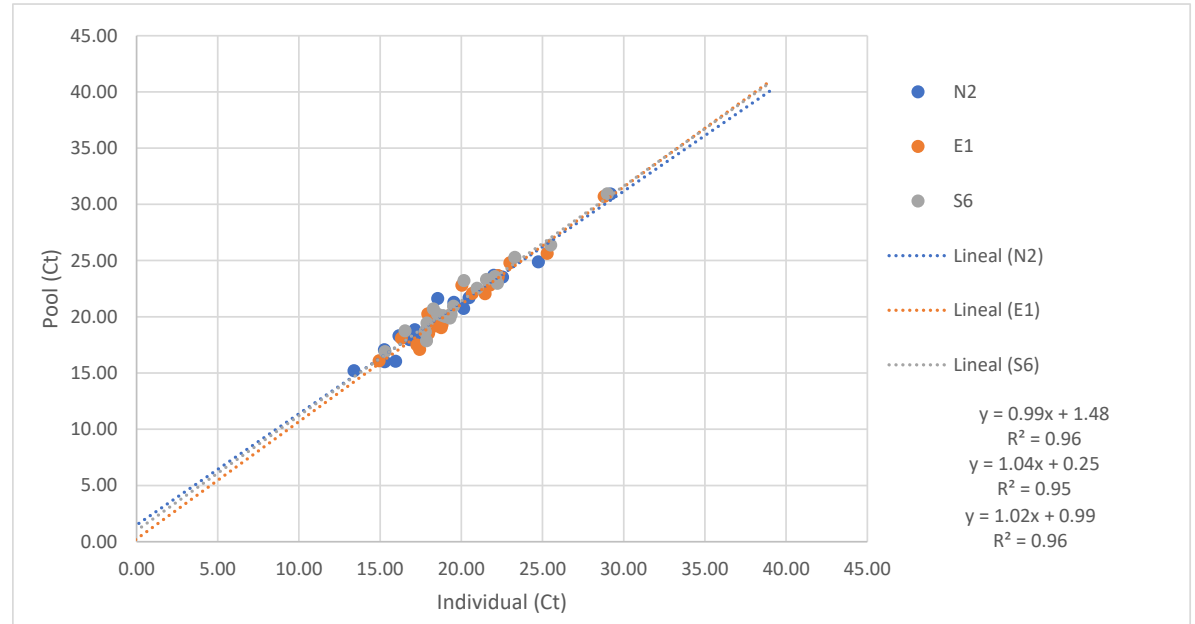

|   | Pool  |            |           | Individual |            |              |
|---|-------|------------|-----------|------------|------------|--------------|
|   | LOD   | 95% CI low | 95% CI up | LOD        | 95% CI low | 95% CI upper |
| N | 37.29 | 36.91      | 37.67     | 36.17      | 35.79      | 36.56        |
| E | 37.29 | 36.91      | 37.67     | 35.62      | 35.25      | 35.98        |
| S | 37.29 | 36.91      | 37.67     | 35.59      | 35.22      | 35.96        |

For a pool which is at the limit of detection, the individual sample would have had a Ct around 36.17 for N2. This means that during the pooling procedure samples with Cts between 36.17 and 37.29 would have been detected using individual testing but will not be due to pooling.
